# Supplementary material
Source: PubMed Central journal article supplement (PMC2980567)

## Supporting Information

### Stereoselective Synthesis of Spirooxindole Amides through Nitrile Hydrozirconation

Chunliang Lu, Qing Xiao, and Paul E. Floreancig\*

Department of Chemistry  
University of Pittsburgh  
Pittsburgh, Pennsylvania, 15260

#### General Experimental:

Proton ( $^1\text{H}$  NMR) and carbon ( $^{13}\text{C}$  NMR) nuclear magnetic resonance spectra were recorded on a Bruker Avance 300 spectrometer at 300 MHz and 75 MHz, a Bruker Avance 400 spectrometer at 400 MHz and 100 MHz, a Bruker Avance 500 spectrometer at 500 MHz, a Bruker Avance 600 spectrometer at 600 MHz if specified. The chemical shifts are reported in parts per million (ppm) on the delta ( $\delta$ ) scale. The solvent peak was used as a reference value, for  $^1\text{H}$  NMR:  $\text{CDCl}_3 = 7.27$  ppm, DMSO = 2.50, for  $^{13}\text{C}$  NMR:  $\text{CDCl}_3 = 77.23$ , DMSO = 39.52. Data are reported as follows: (s = singlet; d = doublet; t = triplet; q = quartet; sept = septet; dd = doublet of doublets; ddd = doublet of doublet of doublets; dddd = doublet of doublet of doublet of doublet; td = triplet of doublets; dtd = doublet of triplet of doublets; br = broad). High resolution and low resolution mass spectra were recorded on a VG 7070 spectrometer. Infrared (IR) spectra were collected on a Mattson Cygnus 100 spectrometer. Samples for IR were prepared as a thin film on a NaCl plate by dissolving the compound in  $\text{CH}_2\text{Cl}_2$  and then evaporating the  $\text{CH}_2\text{Cl}_2$ . Tetrahydrofuran and diethyl ether were distilled from sodium and benzophenone. Methylene chloride was distilled under  $\text{N}_2$  from  $\text{CaH}_2$ . All acid chlorides were freshly distilled prior to use. Analytical TLC was performed on E. Merck pre-coated (25 mm) silica gel 60F-254 plates. Visualization was done under UV (254 nm). Flash chromatography was done using ICN SiliTech 32-63 60 Å silica gel. Reagent grade ethyl acetate, diethyl ether, toluene and hexanes (commercial mixture) were purchased from EM Science and used as is for chromatography. All reactions were performed in oven or flame-dried glassware under argon with magnetic stirring unless otherwise noted. All the reactions that use the Schwartz reagent were performed under argon unless otherwise specified. All products in this manuscript are racemic mixtures but are drawn and named as single enantiomers to indicate their relative stereochemistry.

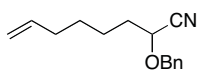

### 2-(Benzyloxy)oct-7-enitrile (5)

To a solution of 6-heptenal (**4**) (168 mg, 1.5 mmol) and BnOTMS (649 mg, 3.6 mmol) in CH<sub>2</sub>Cl<sub>2</sub> (2.5 mL) under argon was added BiBr<sub>3</sub> (34 mg, 0.075 mmol). The suspension was stirred overnight, and then TMSCN (394 mL, 3.1 mmol) and BiBr<sub>3</sub> (32 mg, 0.075 mmol) were added. The suspension was stirred for another 4 h then was quenched with saturated NaHCO<sub>3</sub>. The mixture was extracted with EtOAc (3x), and the combined organic layer was washed with brine. The organic layer was dried over Na<sub>2</sub>SO<sub>4</sub>, concentrated at reduced pressure, and purified by flash chromatography (5% to 10% EtOAc in hexane) to give **5** as a colorless oil (277 mg, 81%). <sup>1</sup>H NMR (300 MHz, CDCl<sub>3</sub>) δ 7.38-7.35 (m, 5H), 5.79 (ddt, 1H, *J* = 6.6, 10.2, 17.1 Hz), 5.02 (d, 1H, *J* = 17.1 Hz), 4.97 (d, 1H, *J* = 9.6 Hz), 4.86 (d, 1H, *J* = 11.7 Hz), 4.53 (d, 1H, *J* = 11.7 Hz), 4.16 (t, 1H, *J* = 6.6 Hz), 2.05 (q, 2H, *J* = 6.6 Hz), 1.91-1.85 (m, 2H), 1.54-1.48 (m, 2H), 1.46-1.37 (m, 2H); <sup>13</sup>C NMR (75 MHz, CDCl<sub>3</sub>) δ 138.4, 136.1, 128.8, 128.6, 128.3, 118.4, 115.0, 72.3, 67.7, 33.5, 33.4, 28.3, 24.3; IR (neat) 3068, 3033, 2930, 2864, 1640, 1456, 1100, 913, 740 cm<sup>-1</sup>; HRMS (EI) *m/z* calcd for C<sub>15</sub>H<sub>19</sub>NO [M]<sup>+</sup> 229.1467, found 229.1460.

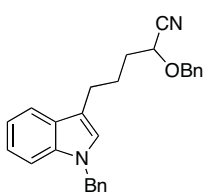

### 5-(1-Benzyl-1*H*-indol-3-yl)-2-(benzyloxy)pentanenitrile (6)

To a solution of **5** (1.90 g, 8.3 mmol) in CH<sub>2</sub>Cl<sub>2</sub> (84 mL) was treated with O<sub>3</sub> at -78 °C until the blue color persisted. PPh<sub>3</sub> (8.7 g, 33.1 mmol) was then added and the solution was allowed to warm to rt. After stirring for 1 hour, the solvent was removed under reduced pressure, and the residue was purified by flash chromatography (5% to 40% EtOAc in hexane) to give the aldehyde as colorless oil (1.48 g, 78%). To a solution of the aldehyde (400 mg, 1.73 mmol) in HOAc (9 mL), was added 1-benzyl-1-phenylhydrazine hydrochloride (406 mg, 1.73 mmol). The solution was stirred at 100 °C for 1 h under N<sub>2</sub>. The solution was cooled to rt and the solvent was removed under reduced pressure. The residue was diluted with EtOAc and washed with saturated NaHCO<sub>3</sub> solution (2x). The organic layer was dried over Na<sub>2</sub>SO<sub>4</sub>, concentrated under reduced pressure, and purified by flash chromatography (5% to 10% EtOAc in hexane) to give **6** as a slightly red oil (610 mg, 89%). <sup>1</sup>H NMR (300 MHz, CDCl<sub>3</sub>) δ 7.58 (d, 1H, *J* = 7.5 Hz), 7.37-7.25 (m, 9H), 7.18 (t, 1H, *J* = 7.2 Hz), 7.13-7.08 (m, 3H), 6.89 (s, 1H), 5.28 (s, 2H), 4.83 (d, 1H, *J* = 11.4 Hz), 4.49 (d, 1H, *J* = 11.4 Hz), 4.17 (t, 1H, *J* = 6.0 Hz), 2.80 (t, 2H, *J* = 6.3 Hz), 1.95-1.91 (m, 4H); <sup>13</sup>C NMR (75 MHz, CDCl<sub>3</sub>) δ 137.8, 136.8, 136.1, 128.9, 128.8, 128.5, 128.4, 128.1, 127.7, 126.9, 125.7, 121.9, 119.1, 118.5, 114.8, 109.8, 72.3, 67.7, 50.0, 33.3, 25.4, 24.5; IR (neat) 3030, 2926, 2866, 1466, 1454, 1331, 1101, 739 cm<sup>-1</sup>; HRMS (EI) *m/z* calcd for C<sub>27</sub>H<sub>26</sub>N<sub>2</sub>O [M]<sup>+</sup> 394.2045, found 394.2043.

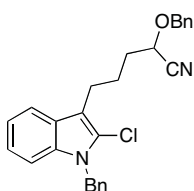

### 5-(1-Benzyl-2-chloro-1*H*-indol-3-yl)-2-(benzyloxy)pentanenitrile (7)

To a solution of **6** (250 mg, 0.63 mmol) in CH<sub>2</sub>Cl<sub>2</sub> (5.3 mL) was added NCS (85 mg, 0.63 mmol) at room temperature under argon atmosphere. The solution was stirred for 1 h, and then the solvent was removed under reduced pressure. The residue was purified by flash chromatography (5% to 10% EtOAc in hexane) to give **7** as slightly yellow oil (217 mg, 80%). <sup>1</sup>H NMR (500 MHz, CDCl<sub>3</sub>) δ 7.51 (d, 1H, *J* = 7.5 Hz), 7.37-7.33 (m, 4H), 7.29-7.22 (m, 5H), 7.17 (t, 1H, *J* = 7.5 Hz), 7.12 (t, 1H, *J* = 7.0 Hz), 7.08 (d,

2H,  $J = 7.0$  Hz), 5.38 (s, 2H), 4.83 (d, 1H,  $J = 11.5$  Hz), 4.49 (d, 1H,  $J = 11.5$  Hz), 4.17 (t, 1H,  $J = 5.5$  Hz), 2.84 (app s, 2H), 1.95-1.91 (m, 4H);  $^{13}\text{C}$  NMR (75 MHz,  $\text{CDCl}_3$ )  $\delta$  137.3, 136.1, 135.6, 128.9, 128.8, 128.6, 128.4, 127.6, 126.9, 126.5, 123.6, 122.3, 120.2, 118.4, 118.4, 111.0, 109.9, 72.4, 67.6, 47.0, 33.0, 25.0, 23.5; IR (neat) 3060, 3031, 2928, 2865, 1456, 1334, 1102, 739, 697  $\text{cm}^{-1}$ ; HRMS (EI)  $m/z$  calcd for  $\text{C}_{27}\text{H}_{25}\text{N}_2\text{OCl}$   $[\text{M}]^+$  428.1655, found 428.1647.

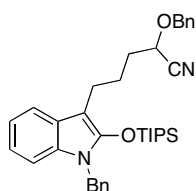

**5-(1-Benzyl-2-((triisopropylsilyloxy)-1H-indol-3-yl)-2-(benzyloxy)pentanenitrile (8)**

To a solution of **6** (135 mg, 0.34 mmol) in AcOH/concentrated HCl (16.3 mL, 4:1) was added DMSO (468  $\mu\text{L}$ , 6.8 mmol) dropwise at room temperature. The solution was stirred for 1.5 hours, and then poured into saturated  $\text{NaHCO}_3$  solution. The mixture was extracted with EtOAc (2x), and the combined organic layer was dried over  $\text{Na}_2\text{SO}_4$ . After removal of the solvent under reduced pressure, the residue was purified by chromatography (10% to 30% EtOAc in hexane) to give the oxindole as yellow oil (84 mg, 60%). To a solution of the oxindole (838 mg, 2.04 mmol) in  $\text{CH}_2\text{Cl}_2$  (17 mL) under argon at 0  $^\circ\text{C}$  were added  $\text{Et}_3\text{N}$  (566  $\mu\text{L}$ , 4.08 mmol) and TIPSOTf (553  $\mu\text{L}$ , 2.04 mmol). The ice bath was removed and the solution was stirred at rt for 1.5 h. The reaction was quenched with saturated  $\text{NaHCO}_3$  solution. The aqueous layer was extracted with  $\text{CH}_2\text{Cl}_2$  (2x), and then the combined organic layer was dried over  $\text{Na}_2\text{SO}_4$ . The mixture was filtered and concentrated, then the resulting residue was purified by flash chromatography (4% to 10% EtOAc in hexane with 0.5%  $\text{Et}_3\text{N}$ ) to give **8** as a slightly yellow oil (1.09 g, 95%).  $^1\text{H}$  NMR (400 MHz,  $\text{CDCl}_3$ )  $\delta$  7.40 (d, 1H,  $J = 7.2$  Hz), 7.38-7.32 (m, 5H), 7.24 (app d, 2H,  $J = 7.6$  Hz), 7.20 (d, 1H,  $J = 7.2$  Hz), 7.06-6.98 (m, 5H), 5.22 (s, 2H), 4.80 (d, 1H,  $J = 11.6$  Hz), 4.46 (d, 1H,  $J = 11.6$  Hz), 4.15 (t, 1H,  $J = 6.0$  Hz), 2.73 (t, 2H,  $J = 7.0$  Hz), 1.99-1.85 (m, 4H), 1.27 (septet, 3H,  $J = 7.6$  Hz), 1.08 (d, 18H,  $J = 7.2$  Hz);  $^{13}\text{C}$  NMR (100 MHz,  $\text{CDCl}_3$ )  $\delta$  145.2, 137.8, 136.1, 131.6, 128.6, 128.6, 128.2, 127.4, 127.1, 126.3, 119.7, 119.4, 118.4, 117.5, 109.2, 93.1, 72.2, 67.8, 45.1, 33.5, 25.5, 23.2, 17.9, 13.8; IR (neat) 3061, 3031, 2946, 2867, 1620, 1578, 1469, 1414, 1339, 1008, 769, 737  $\text{cm}^{-1}$ ; HRMS (ESI)  $m/z$  calcd for  $\text{C}_{36}\text{H}_{47}\text{N}_2\text{O}_2\text{Si}$   $[\text{M}+\text{H}]^+$  567.3407, found 567.3363.

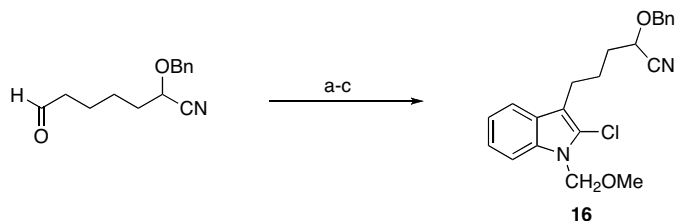

**Reagents and conditions**

a)  $\text{PhNHNH}_2$ , HOAc, 105  $^\circ\text{C}$ , 61%. b) NCS,  $\text{CCl}_4$ . c) NaH, THF, then MOMCl, 63% (two steps).

**Scheme 1.** Synthesis of *N*-methoxymethyl indole substrate.

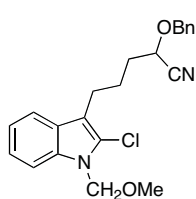

**2-(Benzyloxy)-5-(2-chloro-1-(methoxymethyl)-1H-indol-3-yl)pentanenitrile (16)**

$^1\text{H}$  NMR (300 MHz,  $\text{CDCl}_3$ )  $\delta$  7.49 (d, 1H,  $J = 8.0$  Hz), 7.43 (d, 1H,  $J = 8.0$  Hz), 7.36-7.35 (m, 4H), 7.24 (d, 1H,  $J = 7.2$  Hz), 7.17 (t, 1H,  $J = 7.2$  Hz), 5.52 (s, 2H), 4.83 (d, 1H,  $J = 11.4$  Hz), 4.50 (d, 1H,  $J = 11.4$  Hz), 4.17 (t, 1H,  $J = 6.0$  Hz), 3.29 (s, 3H), 2.80 (t, 2H,  $J = 6.0$  Hz), 1.92-1.88 (m, 4H);  $^{13}\text{C}$  NMR (75 MHz,  $\text{CDCl}_3$ )  $\delta$  136.0, 135.9, 128.7, 128.5, 128.3, 127.1, 123.3, 122.7, 120.8, 118.4, 118.3, 112.0, 109.9, 73.9, 72.3, 67.5, 56.1, 32.9, 24.8, 23.3; IR (neat) 3032, 2935, 2360, 2340, 1455, 1322, 1099, 742, 698  $\text{cm}^{-1}$ ; HRMS (EI)  $m/z$  calcd for  $\text{C}_{22}\text{H}_{23}\text{N}_2\text{O}_2\text{Cl}$   $[\text{M}]^+$  382.1448, found 382.1449.

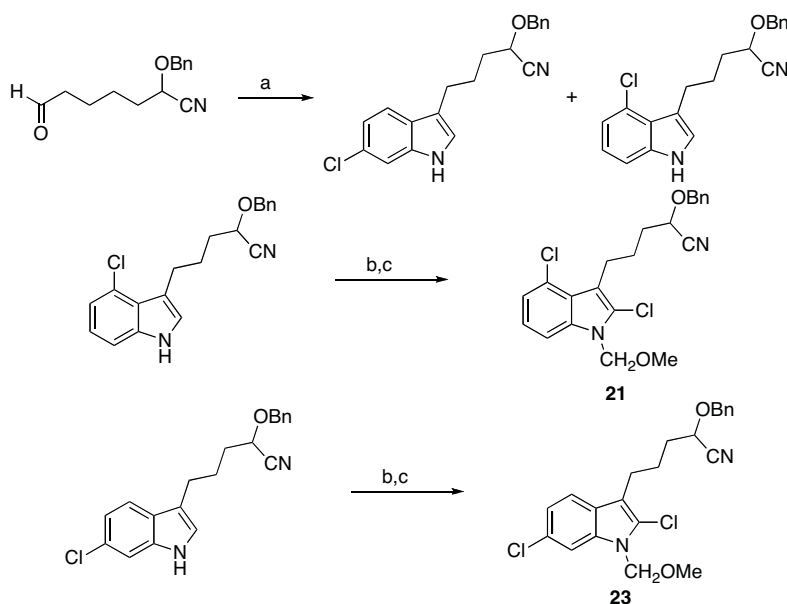

**Reagents and conditions**

a) *m*-ClPhNH $_2$ ·HCl, HOAc, reflux, 45%, 5:4 mixture of products. b) NCS,  $\text{CCl}_4$ . c) NaH, THF, then MOMCl, 43% for **21**, 47% for **23** (two steps).

**Scheme 2.** Preparation of chloroindole substrates.

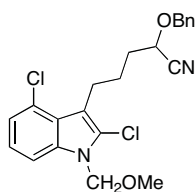

**2-(Benzyloxy)-5-(2,6-dichloro-1-(methoxymethyl)-1H-indol-3-yl)pentanenitrile (21)**

$^1\text{H}$  NMR (300 MHz,  $\text{CDCl}_3$ )  $\delta$  7.43 (d, 1H,  $J = 1.5$  Hz), 7.40-7.35 (m, 6H), 7.13 (dd, 1H,  $J = 1.5, 8.4$  Hz), 5.47 (s, 2H), 4.83 (d, 1H,  $J = 11.7$  Hz), 4.50 (d, 1H,  $J = 11.4$  Hz), 4.16 (t, 1H,  $J = 5.7$  Hz), 3.29 (s, 3H), 2.77 (t, 2H,  $J = 6.3$  Hz), 1.89-1.88 (m, 4H);  $^{13}\text{C}$  NMR (75 MHz,  $\text{CDCl}_3$ )  $\delta$  136.2, 136.0, 128.8, 128.6, 128.4, 125.7, 123.9, 121.6, 119.4, 118.3, 112.2, 110.2, 74.1, 72.4, 67.5, 56.2, 33.0, 24.8, 23.4; IR (neat) 3064, 3032, 2935, 2868, 1465, 1394, 1334, 1099, 913, 807, 741  $\text{cm}^{-1}$ ; HRMS (ESI)  $m/z$  calcd for  $\text{C}_{22}\text{H}_{22}\text{N}_2\text{O}_2\text{Cl}_2\text{Na}$   $[\text{M}+\text{Na}]^+$  439.0956, found 439.0959.

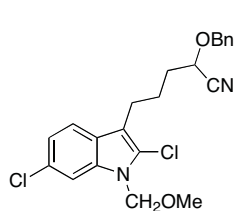

**2-(Benzyloxy)-5-(2,4-dichloro-1-(methoxymethyl)-1H-indol-3-yl)pentanenitrile (23)**

$^1\text{H}$  NMR (300 MHz,  $\text{CDCl}_3$ )  $\delta$  7.38-7.32 (m, 6H), 7.14 (app d, 1H,  $J = 1.5$  Hz), 7.13 (app s, 1H), 5.51 (s, 2H), 4.84 (d, 1H,  $J = 11.7$  Hz), 4.52 (d, 1H,  $J = 11.4$  Hz), 4.20 (t, 1H,  $J = 6.3$  Hz), 3.29 (s, 3H), 3.02 (t, 2H,  $J = 6.9$  Hz), 2.03-1.87 (m, 4H);  $^{13}\text{C}$  NMR (75 MHz,  $\text{CDCl}_3$ )  $\delta$  137.2, 136.1, 128.7, 128.4, 128.3, 125.6, 125.0, 123.9, 123.1, 122.0, 118.4, 112.4, 108.7, 74.2, 72.3, 67.7, 56.1, 32.9, 26.5, 24.0; IR (neat) 3062, 3031, 2939, 2867, 1457, 1430, 1323, 1187, 1102, 914, 739  $\text{cm}^{-1}$ ; HRMS (EI)  $m/z$  calcd for  $\text{C}_{22}\text{H}_{23}\text{N}_2\text{O}_2\text{Cl}_2$   $[\text{M}]^+$  416.1058, found 416.1054.

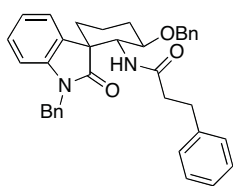

**N-((1S,2R,3R)-1'-Benzyl-3-(benzyloxy)-2'-oxospiro[cyclohexane-1,3'-indolin]-2-yl)-3-phenylpropanamide (11)**

To a solution of **7** (98 mg, 0.23 mmol) in  $\text{CH}_2\text{Cl}_2$  (2.3 mL) was added  $\text{Cp}_2\text{Zr}(\text{H})\text{Cl}$  (74 mg, 0.29 mmol). The reaction mixture was stirred for 15 min. Hydrocinnamoyl chloride (43  $\mu\text{L}$ , 0.29 mmol) was added and the mixture was stirred overnight. The mixture was quenched with saturated  $\text{NaHCO}_3$  solution, and extracted with EtOAc (3x). The combined organic layer was dried over  $\text{Na}_2\text{SO}_4$  and concentrated under reduced pressure. The residue was purified by column chromatography (15% EtOAc in hexane to 100% EtOAc) to give product as two diastereomers (103 mg, 83%, 7.3:1). The faster eluting product **11** was the major diastereomer and was isolated as a white solid (mp 138.7  $^\circ\text{C}$ -140.8  $^\circ\text{C}$ ):  $^1\text{H}$  NMR (300 MHz,  $\text{CDCl}_3$ ) 7.39 (d, 1H,  $J = 7.5$  Hz), 7.32-7.06 (m, 15H), 6.90 (d, 2H,  $J = 7.8$  Hz), 6.70 (d, 1H,  $J = 7.2$  Hz), 4.92 (d, 1H,  $J = 15.6$  Hz), 4.86 (d, 1H,  $J = 9.9$  Hz), 4.79 (d, 1H,  $J = 15.6$  Hz), 4.67 (d, 1H,  $J = 12.0$  Hz), 4.62 (t, 1H,  $J = 9.9$  Hz), 4.45 (d, 1H,  $J = 12.0$  Hz), 4.24 (dt, 1H,  $J = 4.5, 10.8$  Hz), 2.58-2.37 (m, 3H), 2.19 (qt, 1H,  $J = 3.9, 13.2$  Hz), 2.07-1.97 (m, 1H), 1.91-1.78 (m, 2H), 1.74-1.53 (m, 3H);  $^{13}\text{C}$  NMR (100 MHz,  $\text{CDCl}_3$ )  $\delta$  178.7, 171.9, 142.0, 141.1, 139.2, 136.3, 131.8, 129.0, 128.5, 128.5, 128.2, 127.9, 127.7, 127.4, 126.1, 123.9, 123.3, 108.6, 76.3, 90.9, 55.4, 54.4, 43.6, 38.1, 35.2, 31.3, 31.0, 19.0; IR (neat) 3323, 3060, 3029, 2931, 2864, 1699, 1655, 1611, 1543, 1492, 1366, 1027, 1100, 1028, 741  $\text{cm}^{-1}$ ; HRMS (ESI)  $m/z$  calcd for  $\text{C}_{36}\text{H}_{36}\text{N}_2\text{O}_3\text{Na}$   $[\text{M}+\text{Na}]^+$  567.2624, found 567.2648.

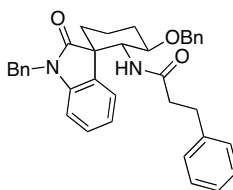

The slower eluting product was repurified by preparative TLC (10% EtOAc in  $\text{CH}_2\text{Cl}_2$ ) to give minor diastereomer **12** as a white solid (mp 171.2  $^\circ\text{C}$ -175.0  $^\circ\text{C}$ ):  $^1\text{H}$  NMR (400 MHz, DMSO)  $\delta$  7.60 (d, 1H,  $J = 7.2$  Hz), 7.29-7.19 (m, 13H), 7.14-7.11 (m, 1H), 7.08-7.03 (m, 3H), 6.88 (d, 1H,  $J = 9.6$  Hz), 6.86 (d, 1H,  $J = 7.6$  Hz), 4.97 (d, 1H,  $J = 15.6$  Hz), 4.68 (d, 1H,  $J = 15.6$  Hz), 4.62 (d, 1H,  $J = 11.6$  Hz), 4.47 (t, 1H,  $J = 10.4$  Hz), 4.45 (d, 1H,  $J = 11.6$  Hz), 3.84 (dt, 1H,  $J = 4.4, 10.8$  Hz), 2.55 (t, 2H,  $J = 8.4$  Hz), 2.36 (app d, 1H,  $J = 9.6$  Hz), 2.21-2.13 (m, 1H), 2.06-1.98 (m, 1H), 1.94-1.85 (m, 2H), 1.81-1.77 (m, 1H), 1.50-1.42 (m, 2H);  $^{13}\text{C}$  NMR (75 MHz, DMSO)  $\delta$  177.2, 171.2, 142.9, 141.4, 139.3, 136.6, 130.0, 128.4, 128.2, 128.0, 127.9, 127.2, 125.9, 125.7, 121.9, 108.9, 77.4, 70.6, 54.8, 54.0, 42.6, 36.9, 33.7, 31.1, 30.9, 19.7; IR (neat) 3272, 3061, 3028, 2925, 2854, 1712, 1650, 1609, 1546, 1464, 1363  $\text{cm}^{-1}$ ; HRMS (ESI)  $m/z$  calcd for  $\text{C}_{36}\text{H}_{36}\text{N}_2\text{O}_3\text{Na}$   $[\text{M}+\text{Na}]^+$  567.2624, found 567.2604.

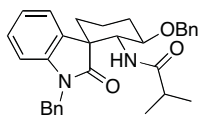

***N*-((1*S*,2*R*,3*R*)-1'-Benzyl-3-(benzyloxy)-2'-oxospiro[cyclohexane-1,3'-indolin]-2-yl)isobutyramide (**13**)**

To a solution of **7** (104 mg, 0.24 mmol) in CH<sub>2</sub>Cl<sub>2</sub> (2.4 mL) was added Cp<sub>2</sub>Zr(H)Cl (78 mg, 0.30 mmol). The reaction mixture was stirred for 15 min. Isobutyryl chloride (31 μL, 0.30 mmol) was added and the mixture was stirred overnight. The reaction was quenched with saturated NaHCO<sub>3</sub> solution, and extracted with EtOAc (3x). The combined organic layer was dried over Na<sub>2</sub>SO<sub>4</sub> and concentrated under reduced pressure. The residue was purified by column chromatography (15% EtOAc in hexane to 100% EtOAc) to give product as two diastereomers (100 mg, 87%, 3.6:1). The faster eluting product was the major diastereomer **13** and was isolated as a pale yellow oil: <sup>1</sup>H NMR (500 MHz, CDCl<sub>3</sub>) δ 7.36 (d, 1H, *J* = 7.5 Hz), 7.30-7.27 (m, 10H), 7.13 (t, 1H, *J* = 7.5 Hz), 7.05 (t, 1H, *J* = 7.5 Hz), 6.70 (d, 1H, *J* = 7.5 Hz), 4.98 (d, 1H, *J* = 15.5 Hz), 4.83 (d, 1H, *J* = 9.5 Hz), 4.78 (d, 1H, *J* = 15.5 Hz), 4.70 (d, 1H, *J* = 12.0 Hz), 4.60 (t, 1H, *J* = 10.0 Hz), 4.49 (t, 1H, *J* = 12.0 Hz), 4.28 (dt, 1H, *J* = 4.0, 10.5 Hz), 2.40 (d, 1H, *J* = 11.5 Hz), 2.23 (app q, 1H, *J* = 13.5 Hz), 1.90 (t, 1H, *J* = 13.5 Hz), 1.81 (app d, 1H, *J* = 13.5 Hz), 1.74-1.70 (m, 2H), 1.63-1.57 (m, 1H), 0.78 (d, 3H, *J* = 6.5 Hz), 0.42 (d, 3H, *J* = 6.5 Hz); <sup>13</sup>C NMR (75 MHz, CDCl<sub>3</sub>) δ 178.8, 176.5, 142.0, 139.2, 136.4, 131.6, 129.0, 128.4, 128.0, 127.7, 127.6, 127.5, 124.0, 123.3, 108.4, 76.2, 71.0, 55.0, 54.6, 43.7, 35.9, 34.9, 31.2, 19.6, 19.1, 18.9; IR (neat) 3337, 3060, 3030, 2867, 1694, 1611, 1491, 1466, 1365, 1208, 1173, 1098, 740, 698 cm<sup>-1</sup>; HRMS (EI) *m/z* calcd for C<sub>31</sub>H<sub>34</sub>N<sub>2</sub>O<sub>3</sub> [M]<sup>+</sup> 482.2569, found 482.2569.

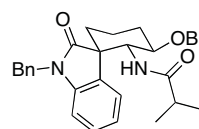

The slower eluting product was minor diastereomer **25** and was isolated as a white solid (mp 158.1 °C-161.2 °C): <sup>1</sup>H NMR (300 MHz, DMSO) δ 7.59 (d, 1H, *J* = 7.5 Hz), 7.27-7.22 (m, 11H), 7.07 (t, 1H, *J* = 7.2 Hz), 6.84 (t, 1H, *J* = 7.5 Hz), 6.70 (d, 1H, *J* = 9.6 Hz), 4.86 (d, 1H, *J* = 15.9 Hz), 4.78 (d, 1H, *J* = 15.9 Hz), 4.62 (d, 1H, *J* = 11.4 Hz), 4.47 (d, 1H, *J* = 11.4 Hz), 4.40 (t, 1H, *J* = 10.2 Hz), 3.86 (dt, 1H, *J* = 4.5, 10.5 Hz), 2.37 (app d, 1H, *J* = 14.1 Hz), 2.12 (quintet, 1H, *J* = 6.9 Hz), 1.90-1.76 (m, 3H), 1.47-1.41 (m, 2H), 0.74 (d, 3H, *J* = 6.6 Hz), 0.70 (d, 3H, *J* = 6.9 Hz); <sup>13</sup>C NMR (75 MHz, DMSO) δ 177.2, 175.6, 143.0, 139.2, 136.4, 130.0, 128.5, 127.9, 127.2, 127.0, 126.9, 125.9, 121.8, 108.8, 77.1, 70.5, 54.4, 54.1, 42.7, 33.8, 33.5, 31.0, 19.8, 19.6, 18.9; IR (neat) 3345, 3060, 3032, 2934, 2870, 1712, 1678, 1609, 1489, 1463, 1364, 1209, 1105, 743, 697 cm<sup>-1</sup>; HRMS (EI) *m/z* calcd for C<sub>31</sub>H<sub>34</sub>N<sub>2</sub>O<sub>3</sub> [M]<sup>+</sup> 482.2569, found 482.2579.

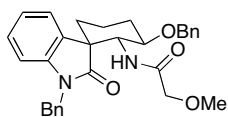

***N*-((1*S*,2*R*,3*R*)-1'-Benzyl-3-(benzyloxy)-2'-oxospiro[cyclohexane-1,3'-indolin]-2-yl)-2-methoxyacetamide (**14**)**

To a solution of **7** (118 mg, 0.28 mmol) in CH<sub>2</sub>Cl<sub>2</sub> (2.8 mL) was added Cp<sub>2</sub>Zr(H)Cl (89 mg, 0.34 mmol). The reaction mixture was stirred for 15 min. Methoxyacetyl chloride (31 μL, 0.34 mmol) was added and the mixture was stirred overnight. The reaction was quenched with saturated NaHCO<sub>3</sub> solution, and extracted with EtOAc (3x). The combined organic layer was dried over Na<sub>2</sub>SO<sub>4</sub>, and concentrated under reduced pressure. The residue was purified by column chromatography (15% EtOAc in hexane to 100% EtOAc) to give product as two diastereomers (61 mg, 46%, 9.1:1). The faster eluting product was major diastereomer **14** and was isolated as a white solid (mp 121.0 °C-123.8 °C): <sup>1</sup>H NMR (400 MHz, CDCl<sub>3</sub>) 7.38 (d, 1H, *J* = 7.2 Hz), 7.34-7.25 (m, 10H), 7.11 (t, 1H, *J* = 7.6 Hz), 7.05 (d, 1H, *J* = 7.2

Hz), 6.61 (d, 1H,  $J = 7.2$  Hz), 6.22 (d, 1H,  $J = 10.4$  Hz), 4.99 (d, 1H,  $J = 15.6$  Hz), 4.83 (d, 1H,  $J = 15.6$  Hz), 4.72 (d, 1H,  $J = 11.6$  Hz), 4.64 (t, 1H,  $J = 10.4$  Hz), 4.52 (d, 1H,  $J = 11.6$  Hz), 4.31 (dt, 1H,  $J = 4.4, 10.8$  Hz), 3.61 (d, 1H,  $J = 15.2$  Hz), 3.49 (d, 1H,  $J = 15.2$  Hz), 3.07 (s, 3H), 2.42 (d, 1H,  $J = 12.8$  Hz), 2.23 (qt, 1H,  $J = 3.6, 13.6$  Hz), 1.91 (app dt, 1H,  $J = 4.0, 14.0$  Hz), 1.84-1.80 (m, 1H), 1.71 (app dq, 1H,  $J = 3.2, 13.6$  Hz), 1.60-1.54 (m, 1H);  $^{13}\text{C}$  NMR (75 MHz,  $\text{CDCl}_3$ )  $\delta$  178.3, 169.5, 141.9, 139.0, 135.8, 131.6, 128.8, 128.2, 128.0, 127.6, 127.3, 127.2, 127.1, 123.5, 123.1, 108.6, 71.6, 71.2, 58.8, 54.8, 54.2, 43.6, 35.5, 30.9, 18.8; IR (neat) 3063, 3032, 2931, 1695, 1613, 1519, 1366, 1204, 1110, 1027, 741  $\text{cm}^{-1}$ ; HRMS (ESI)  $m/z$  calcd for  $\text{C}_{30}\text{H}_{32}\text{N}_2\text{O}_4\text{Na}$   $[\text{M}+\text{Na}]^+$  507.2260, found 507.2279.

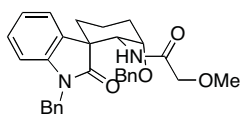

The slower eluting *syn*-diastereomer was repurified by preparative TLC (10% EtOAc in  $\text{CH}_2\text{Cl}_2$ ):  $^1\text{H}$  NMR (400 MHz,  $\text{CDCl}_3$ )  $\delta$  7.37 (d, 1H,  $J = 7.2$  Hz), 7.33-7.24 (m, 10H), 7.16 (t, 1H,  $J = 8.0$  Hz), 7.07 (d, 1H,  $J = 10.4$  Hz), 6.97 (t, 1H,  $J = 7.6$  Hz), 6.70 (d, 1H,  $J = 7.6$  Hz), 5.01 (d, 1H,  $J = 15.6$  Hz), 4.80 (d, 1H,  $J = 15.6$  Hz), 4.60 (dd, 1H,  $J = 4.0, 10.0$  Hz), 4.57 (d, 1H,  $J = 12.0$  Hz), 4.44 (d, 1H,  $J = 12.0$  Hz), 4.05 (quintet, 1H,  $J = 4.0$  Hz), 3.89 (d, 1H,  $J = 14.8$  Hz), 3.82 (d, 1H,  $J = 14.8$  Hz), 2.18-2.12 (m, 1H), 2.10-2.03 (m, 1H), 1.99-1.95 (m, 1H), 1.91-1.81 (m, 2H), 1.66-1.63 (m, 1H);  $^{13}\text{C}$  NMR (100 MHz,  $\text{CDCl}_3$ )  $\delta$  176.8, 169.9, 142.6, 138.4, 136.1, 132.3, 129.0, 128.5, 128.1, 127.8, 127.7, 127.4, 124.9, 122.1, 109.5, 73.6, 72.2, 70.5, 59.5, 51.3, 49.4, 44.1, 29.9, 27.3, 19.0; IR (neat) 3061, 2938, 1711, 1681, 1610, 1465, 1360, 1110, 1026, 918  $\text{cm}^{-1}$ ; HRMS (ESI)  $m/z$  calcd for  $\text{C}_{30}\text{H}_{32}\text{N}_2\text{O}_4\text{Na}$   $[\text{M}+\text{Na}]^+$  507.2260, found 507.2239.

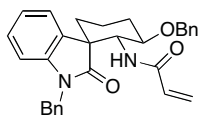

***N*-((1*S*,2*R*,3*R*)-1'-Benzyl-3-(benzyloxy)-2'-oxospiro[cyclohexane-1,3'-indolin]-2-yl)acrylamide (**15**)**

To a solution of **7** (109 mg, 0.25 mmol) in  $\text{CH}_2\text{Cl}_2$  (2.5 mL) was added  $\text{Cp}_2\text{Zr}(\text{H})\text{Cl}$  (82 mg, 0.32 mmol). The reaction mixture was stirred for 15 min. Acryloyl chloride (26  $\mu\text{L}$ , 0.32 mmol) was added and the mixture was stirred overnight. The reaction was quenched with saturated  $\text{NaHCO}_3$  solution, and extracted with EtOAc (3x). The combined organic layer was dried over  $\text{Na}_2\text{SO}_4$  and concentrated under reduced pressure. The residue was purified by column chromatography (15% EtOAc in hexane to 100% EtOAc) to give product as two diastereomers (62 mg, 53%, 20:1). The faster eluting product was major diastereomer **15** and was isolated as a white solid (mp 157.0  $^\circ\text{C}$ -161.2  $^\circ\text{C}$ ):  $^1\text{H}$  NMR (400 MHz,  $\text{CDCl}_3$ )  $\delta$  7.40 (d, 1H,  $J = 7.6$  Hz), 7.32-7.21 (m, 10H), 7.13 (dt, 1H,  $J = 3.6, 7.6$  Hz), 7.07 (dt, 1H,  $J = 3.6, 7.6$  Hz), 6.67 (d, 1H,  $J = 7.6$  Hz), 5.95 (dd, 1H,  $J = 3.6, 16.8$  Hz), 5.60 (dd, 1H,  $J = 10.4, 17.2$  Hz), 5.43 (dd, 1H,  $J = 3.6, 7.6$  Hz), 4.99-4.95 (m, 2H), 4.80 (d, 1H,  $J = 15.6$  Hz), 4.69 (d, 1H,  $J = 12.0$  Hz), 4.67 (t, 1H,  $J = 10.0$  Hz), 4.47 (d, 1H,  $J = 12.0$  Hz), 4.25 (dt, 1H,  $J = 4.8, 10.4$  Hz), 2.41 (app d, 1H,  $J = 3.2, 12.8$  Hz), 2.18 (qt, 1H,  $J = 4.0, 13.6$  Hz), 1.90 (dt, 1H,  $J = 4.0, 14.0$  Hz), 1.81 (app d, 1H,  $J = 12.8$  Hz), 1.72 (app dt, 1H,  $J = 3.2, 13.6$  Hz), 1.65-1.55 (m, 1H);  $^{13}\text{C}$  NMR (100 MHz,  $\text{CDCl}_3$ )  $\delta$  178.7, 165.4, 142.0, 139.1, 136.2, 131.8, 130.8, 129.1, 128.5, 128.2, 127.9, 127.8, 127.2, 126.4, 123.8, 123.5, 108.7, 76.6, 91.0, 55.4, 54.4, 43.5, 35.4, 30.9, 19.1; IR (neat) 3289, 3060, 3031, 2930, 2863, 1701, 1611, 1540, 1492, 1365, 1206, 986, 739  $\text{cm}^{-1}$ ; HRMS (ESI)  $m/z$  calcd for  $\text{C}_{30}\text{H}_{30}\text{N}_2\text{O}_3\text{Na}$   $[\text{M}+\text{Na}]^+$  489.2154, found 489.2176.

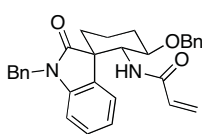

The slower eluting product was repurified by preparative TLC (10 % EtOAc in CH<sub>2</sub>Cl<sub>2</sub>) to give minor diastereomer **27** as a white solid (mp 222.6 °C-226.9 °C): <sup>1</sup>H NMR (400 MHz, DMSO) δ 7.63 (d, 1H, *J* = 7.6 Hz), 7.32-7.17 (m, 12H), 7.07 (d, 1H, *J* = 7.2 Hz), 6.78 (d, 1H, *J* = 8.0 Hz), 6.14 (dd, 1H, *J* = 9.6, 16.8 Hz), 6.01 (dd, 1H, *J* = 2.0, 16.8 Hz), 5.52 (dd, 1H, *J* = 2.4, 10.0 Hz), 5.08 (d, 1H, *J* = 16.0 Hz), 4.63-4.55 (m, 3H), 4.46 (d, 1H, *J* = 11.6 Hz), 3.90 (dt, 1H, *J* = 4.0, 10.8 Hz), 2.38 (app d, 1H, *J* = 11.6 Hz), 1.92-1.78 (m, 3H), 1.52-1.43 (m, 2H); <sup>13</sup>C NMR (100 MHz, DMSO) δ 177.1, 164.6, 142.8, 139.2, 136.2, 132.0, 129.9, 128.5, 128.0, 128.0, 127.2, 127.1, 126.8, 126.0, 125.0, 121.9, 109.0, 77.3, 70.7, 55.0, 54.0, 42.5, 33.8, 31.1, 30.7, 19.7; IR (neat) 3245, 3061, 2934, 2856, 1709, 1658, 1610, 1551, 1465, 1361, 734 cm<sup>-1</sup>; HRMS (ESI) *m/z* calcd for C<sub>30</sub>H<sub>30</sub>N<sub>2</sub>O<sub>3</sub>Na [M+Na]<sup>+</sup> 489.2154, found 489.2141.

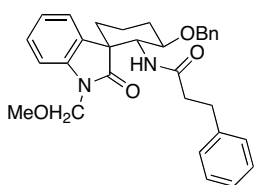

***N*-((1*S*,2*R*,3*R*)-3-(Benzyloxy)-1'-(methoxymethyl)-2'-oxospiro[cyclohexane-1,3'-indolin]-2-yl)-3-phenylpropanamide (**17**)**

To a solution of **16** (83 mg, 0.26 mmol) in CH<sub>2</sub>Cl<sub>2</sub> (2.6 mL) was added Cp<sub>2</sub>Zr(H)Cl (81 mg, 0.31 mmol). The reaction mixture was stirred for 15 min. Hydrocinnamoyl chloride (46 μL, 0.31 mmol) was added and the mixture was stirred overnight. The reaction was quenched with saturated NaHCO<sub>3</sub> solution, and extracted with EtOAc (3x). The combined organic layer was dried over Na<sub>2</sub>SO<sub>4</sub> and concentrated under reduced pressure. The residue was purified by column chromatography (15% EtOAc in hexane to 100% EtOAc) to give product as two diastereomers (83 mg, 64%, 15:1). The faster eluting product was major diastereomer **17** and was isolated as a white solid (mp 163.0 °C-164.8 °C): <sup>1</sup>H NMR (300 MHz, CDCl<sub>3</sub>) 7.41 (d, 1H, *J* = 7.2 Hz), 7.31-7.23 (m, 6H), 7.20-7.12 (m, 4H), 6.95-6.91 (m, 3H), 5.09 (d, 1H, *J* = 10.5 Hz), 5.04 (d, 1H, *J* = 10.5 Hz), 4.94 (d, 1H, *J* = 9.6 Hz), 4.67 (d, 1H, *J* = 12.0 Hz), 4.62 (t, 1H, *J* = 9.9 Hz), 4.44 (d, 1H, *J* = 12.0 Hz), 4.19 (dt, 1H, *J* = 4.5, 10.2 Hz), 3.27 (s, 3H), 2.55 (app dt, 1H, *J* = 3.0, 9.5 Hz), 2.38 (app d, 1H, *J* = 17.4 Hz), 2.19-2.08 (m, 1H), 2.06-1.93 (m, 2H), 1.87 (dd, 1H, *J* = 3.6, 12.9 Hz), 1.80-1.75 (m, 1H), 1.72-1.55 (m, 2H); <sup>13</sup>C NMR (75 MHz, CDCl<sub>3</sub>) δ 179.4, 172.0, 141.1, 139.1, 131.3, 128.6, 128.5, 128.3, 128.2, 127.7, 127.6, 124.0, 123.8, 109.0, 76.4, 71.2, 71.0, 56.3, 55.2, 55.0, 38.4, 35.7, 31.5, 30.9, 19.0; IR (neat) 3251, 3058, 2932, 2865, 1709, 1645, 1551, 1492, 1362, 1088, 743 cm<sup>-1</sup>; HRMS (ESI) *m/z* calcd for C<sub>31</sub>H<sub>34</sub>N<sub>2</sub>O<sub>4</sub>Na [M+Na]<sup>+</sup> 521.2416, found 521.2448.

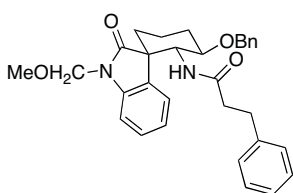

The slower eluting product was isolated as a white solid (mp 193.1 °C-196.8 °C): <sup>1</sup>H NMR (300 MHz, DMSO) δ 7.62 (d, 1H, *J* = 7.5 Hz), 7.35 (d, 1H, *J* = 7.2 Hz), 7.27-7.07 (m, 10H), 7.02 (app d, 1H, *J* = 6.9 Hz), 6.92 (d, 1H, *J* = 9.9 Hz), 4.99 (s, 2H), 4.62 (d, 1H, *J* = 11.7 Hz), 4.45 (d, 1H, *J* = 11.7 Hz), 4.40 (t, 1H, *J* = 10.2 Hz), 3.83 (dt, 1H, *J* = 3.9, 10.5 Hz), 3.10 (s, 3H), 2.36 (app d, 1H, *J* = 12.3 Hz), 2.11-1.99 (m, 2H), 1.87-1.75 (m, 4H), 1.47-1.40 (m, 2H); <sup>13</sup>C NMR (75 MHz, DMSO) δ 177.7, 171.2, 142.2, 141.4, 139.3, 129.6, 128.1, 128.0, 127.9, 127.2, 125.9, 125.7, 122.3, 109.3, 77.2, 70.7, 70.6, 55.3, 54.8, 54.3, 36.9, 33.7, 31.1, 31.0, 19.6; IR (neat) 3260, 3061, 3025, 2935, 2855, 1723, 1648, 1549, 1465, 1357, 1082, 741 cm<sup>-1</sup>; HRMS (ESI) *m/z* calcd for C<sub>31</sub>H<sub>34</sub>N<sub>2</sub>O<sub>4</sub>Na [M+Na]<sup>+</sup> 521.2416, found 521.2440.



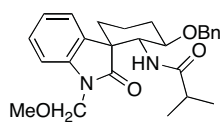

***N*-((1*S*,2*R*,3*R*)-3-(Benzyloxy)-1'-(methoxymethyl)-2'-oxospiro[cyclohexane-1,3'-indolin]-2-yl)isobutyramide (**18**)**

To a solution of **16** (99 mg, 0.26 mmol) in CH<sub>2</sub>Cl<sub>2</sub> (2.6 mL) was added Cp<sub>2</sub>Zr(H)Cl (84 mg, 0.32 mmol). The reaction mixture was stirred for 15 min. Isobutyryl chloride (34 μL, 0.32 mmol) was added and the mixture was stirred overnight. The reaction was quenched with saturated NaHCO<sub>3</sub> solution, and extracted with EtOAc (3x). The combined organic layer was dried over Na<sub>2</sub>SO<sub>4</sub> and concentrated under reduced pressure. The residue was purified by column chromatography (15% EtOAc in hexane to 100% EtOAc) to give the product as two diastereomers (59 mg, 51%, 11.8:1). The faster eluting isomer was major product **18**: <sup>1</sup>H NMR (500 MHz, CDCl<sub>3</sub>) δ 7.38 (d, 1H, *J* = 7.5 Hz), 7.37-7.30 (m, 5H), 7.22 (t, 1H, *J* = 8.0 Hz), 7.12 (t, 1H, *J* = 7.5 Hz), 6.92 (d, 1H, *J* = 7.5 Hz), 5.12 (d, 1H, *J* = 10.5 Hz), 5.09 (d, 1H, *J* = 11.0 Hz), 4.90 (d, 1H, *J* = 10.0 Hz), 4.69 (d, 1H, *J* = 11.5 Hz), 4.60 (t, 1H, *J* = 10.0 Hz), 4.48 (d, 1H, *J* = 12.0 Hz), 4.22 (dt, 1H, *J* = 4.5, 10.5 Hz), 3.34 (s, 3H), 2.39 (d, 1H, *J* = 9.5 Hz), 2.15 (q, 1H, *J* = 13.5 Hz), 1.93-1.86 (m, 2H), 1.79 (app d, 1H, *J* = 14.0 Hz), 1.70 (app d, 1H, *J* = 14.0 Hz), 1.63-1.60 (m, 1H), 0.84 (d, 3H, *J* = 6.5 Hz), 0.60 (d, 3H, *J* = 6.5 Hz); <sup>13</sup>C NMR (75 MHz, CDCl<sub>3</sub>) δ 179.6, 176.7, 141.3, 139.2, 131.2, 128.6, 128.5, 127.7, 127.6, 124.2, 123.8, 108.9, 76.3, 71.4, 71.1, 56.6, 55.2, 54.9, 36.0, 35.3, 31.1, 19.9, 19.1, 19.0; IR (neat) 3333, 3059, 2931, 2869, 1710, 1667, 1523, 1490, 1467, 1361, 1089, 744 cm<sup>-1</sup>; HRMS (EI) *m/z* calcd for C<sub>26</sub>H<sub>32</sub>N<sub>2</sub>O<sub>4</sub> [M]<sup>+</sup> 436.2362, found 436.2366.

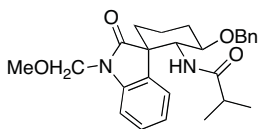

Slower eluting minor product: <sup>1</sup>H NMR (500 MHz, DMSO) δ 7.60 (d, 1H, *J* = 7.5 Hz), 7.34 (t, 1H, *J* = 7.5 Hz), 7.29-7.22 (m, 5H), 7.13 (t, 1H, *J* = 7.5 Hz), 7.07 (d, 1H, *J* = 8.0 Hz), 6.68 (d, 1H, *J* = 10.0 Hz), 4.99 (s, 2H), 4.60 (d, 1H, *J* = 11.5 Hz), 4.46 (d, 1H, *J* = 11.5 Hz), 4.33 (t, 1H, *J* = 10.0 Hz), 3.83 (dt, 1H, *J* = 5.0, 11.5 Hz), 3.14 (s, 3H), 2.35 (app d, 1H, *J* = 6.0 Hz), 2.09 (quintet, 1H, *J* = 6.5 Hz), 1.87-1.81 (m, 2H), 1.74 (m, 1H), 1.45-1.41 (m, 2H), 0.74 (d, 3H, *J* = 6.5 Hz), 0.67 (d, 3H, *J* = 7.0 Hz); <sup>13</sup>C NMR (75 MHz, DMSO) δ 177.8, 175.6, 142.3, 139.2, 129.6, 128.0, 127.9, 127.2, 127.1, 125.9, 122.3, 109.1, 77.0, 70.7, 70.5, 55.6, 54.5, 54.3, 33.6, 33.5, 31.0, 19.7, 19.6, 18.9; IR (neat) 3322, 3060, 2936, 2871, 1723, 1659, 1527, 1465, 1358, 1241, 1095, 915, 742, 698 cm<sup>-1</sup>; HRMS (EI) *m/z* calcd for C<sub>26</sub>H<sub>32</sub>N<sub>2</sub>O<sub>4</sub> [M]<sup>+</sup> 436.2362, found 436.2360.

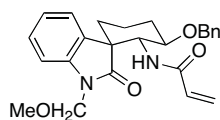

***N*-((1*S*,2*R*,3*R*)-3-(Benzyloxy)-1'-(methoxymethyl)-2'-oxospiro[cyclohexane-1,3'-indolin]-2-yl)acrylamide (**19**)**

To a solution of **16** (98 mg, 0.26 mmol) in CH<sub>2</sub>Cl<sub>2</sub> (2.6 mL) was added Cp<sub>2</sub>Zr(H)Cl (79 mg, 0.31 mmol). The reaction mixture was stirred for 15 min at room temperature. Acryloyl chloride (26 μL, 0.32 mmol) was added and the mixture was stirred for 30 min. Sc(OTf)<sub>3</sub> (13 mg, 0.026 mmol) was added and the solution was stirred for another 1.5 hours. The reaction was quenched with saturated NaHCO<sub>3</sub> solution. The mixture was extracted with EtOAc (3x), and the combined organic layer was dried over Na<sub>2</sub>SO<sub>4</sub>. After removal of the solvent under reduced pressure, the residue was purified by column chromatography (15% EtOAc in hexane to 100% EtOAc) to give product as two diastereomers (49 mg, 46%, 8.2:1). The faster eluting product was major diastereomer **19** and was isolated as a white solid (mp 126.5 °C-128.8 °C): <sup>1</sup>H NMR (300 MHz, CDCl<sub>3</sub>) 7.41 (d, 1H, *J* = 7.2 Hz), 7.31-7.20 (m, 6H),

7.12 (t, 1H,  $J = 7.2$  Hz), 6.93 (d, 1H,  $J = 7.8$  Hz), 6.01 (d, 1H,  $J = 16.8$  Hz), 5.70 (dd, 1H,  $J = 10.5, 17.1$  Hz), 5.45 (d, 1H,  $J = 10.2$  Hz), 5.10 (app s, 2H), 5.04 (d, 1H,  $J = 9.9$  Hz), 4.69 (d, 1H,  $J = 12.0$  Hz), 4.67 (t, 1H,  $J = 10.0$  Hz), 4.47 (d, 1H,  $J = 12.0$  Hz), 4.22 (dt, 1H,  $J = 4.8, 10.8$  Hz), 3.30 (s, 3H), 2.40 (app d, 1H,  $J = 12.3$  Hz), 2.11 (dt, 1H,  $J = 3.6, 13.2$  Hz), 1.89 (dt, 1H,  $J = 3.6, 13.8$  Hz), 1.81-1.52 (m, 3H);  $^{13}\text{C}$  NMR (75 MHz,  $\text{CDCl}_3$ )  $\delta$  179.4, 165.5, 141.0, 139.0, 131.0, 130.8, 128.5, 128.4, 127.8, 127.6, 126.4, 123.9, 109.1, 76.6, 71.3, 71.0, 56.4, 55.2, 54.9, 35.9, 30.9, 19.0; IR (neat) 3291, 3059, 2934, 2864, 1711, 1664, 1612, 1540, 1362, 1230, 1089, 914, 744  $\text{cm}^{-1}$ ; HRMS (ESI)  $m/z$  calcd for  $\text{C}_{25}\text{H}_{28}\text{N}_2\text{O}_4\text{Na}$   $[\text{M}+\text{Na}]^+$  443.1947, found 443.1939.

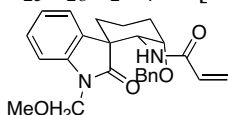

The slower eluting product was repurified by chromatography (10% to 25% EtOAc in  $\text{CH}_2\text{Cl}_2$ ) to provide the minor diastereomer:  $^1\text{H}$  NMR (300 MHz,  $\text{CDCl}_3$ )  $\delta$  7.37 (d, 1H,  $J = 7.5$  Hz), 7.32-7.26 (m, 6H), 7.06 (app t, 2H,  $J = 7.5$  Hz), 6.18 (dd, 1H,  $J = 1.8, 17.1$  Hz), 6.08 (d, 1H,  $J = 9.9$  Hz), 6.03 (d, 1H,  $J = 9.9$  Hz), 5.60 (dd, 1H,  $J = 1.8, 10.2$  Hz), 5.15 (d, 1H,  $J = 11.1$  Hz), 5.10 (d, 1H,  $J = 11.1$  Hz), 4.64 (dd, 1H,  $J = 4.2, 9.9$  Hz), 4.55 (d, 1H,  $J = 11.7$  Hz), 4.46 (d, 1H,  $J = 11.7$  Hz), 4.02 (quintet, 1H,  $J = 4.2$  Hz), 3.32 (s, 3H), 2.17-2.11 (m, 1H), 2.06-1.96 (m, 1H), 1.91-1.82 (m, 3H), 1.69-1.64 (m, 1H);  $^{13}\text{C}$  NMR (75 MHz,  $\text{CDCl}_3$ )  $\delta$  177.4, 165.6, 141.6, 138.3, 132.0, 131.1, 128.6, 128.6, 128.1, 127.8, 126.6, 124.7, 122.8, 109.8, 73.7, 71.6, 70.7, 56.4, 51.7, 50.2, 30.6, 27.4, 18.6; IR (neat) 3323, 3059, 2939, 1723, 1660, 1610, 1539, 1466, 1349, 1240, 1086, 744  $\text{cm}^{-1}$ ; HRMS (ESI)  $m/z$  calcd for  $\text{C}_{25}\text{H}_{28}\text{N}_2\text{O}_4\text{Na}$   $[\text{M}+\text{Na}]^+$  443.1947, found 443.1955.

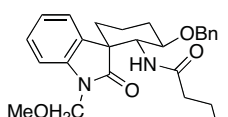

***N*-((1*S*, 2*R*, 3*R*)-3-(Benzyloxy)-1'-(methoxymethyl)-2'-oxospiro[cyclohexane-1,3'-indolin]-2-yl)-3-bromopropanamide (20)**

To a solution of **16** (113 mg, 0.30 mmol) in  $\text{CH}_2\text{Cl}_2$  (3.0 mL) was added  $\text{Cp}_2\text{Zr}(\text{H})\text{Cl}$  (95 mg, 0.37 mmol). The reaction mixture was stirred for 15 min. 3-Bromopropionyl chloride (37  $\mu\text{L}$ , 0.37 mmol) was added and the mixture was stirred for 15 min, followed by addition of  $\text{Sc}(\text{OTf})_3$  (15 mg, 0.03 mmol). The solution was stirred for another 30 min, then was quenched with saturated  $\text{NaHCO}_3$  solution. The mixture was extracted with EtOAc (3x), and the combined organic layer was dried over  $\text{Na}_2\text{SO}_4$ . After removal of the solvent under reduced pressure the residue was purified by column chromatography (15% EtOAc in hexane to 100% EtOAc) to give the product as two diastereomers (80 mg, 54%, 6.7:1). The faster eluting product was the major diastereomer **20** and was isolated as a white solid (mp 169.8  $^\circ\text{C}$ -174.5  $^\circ\text{C}$ ):  $^1\text{H}$  NMR (300 MHz,  $\text{CDCl}_3$ ) 7.33 (d, 1H,  $J = 7.5$  Hz), 7.30-7.21 (m, 6H), 7.18 (d, 1H,  $J = 7.5$  Hz), 7.08 (d, 1H,  $J = 7.5$  Hz), 6.89 (d, 1H,  $J = 7.5$  Hz), 5.06 (s, 2H), 5.01 (d, 1H,  $J = 9.9$  Hz), 4.67 (d, 1H,  $J = 12.0$  Hz), 4.54 (t, 1H,  $J = 9.9$  Hz), 4.44 (d, 1H,  $J = 12.0$  Hz), 4.18 (dt, 1H,  $J = 4.5, 10.5$  Hz), 3.29 (s, 3H), 3.19 (t, 2H,  $J = 7.5$  Hz), 2.43-2.33 (m, 2H), 2.21-2.13 (m, 1H), 2.11-2.02 (m, 1H), 1.85 (dt, 1H,  $J = 3.6, 14.1$  Hz), 1.77-1.46 (m, 3H);  $^{13}\text{C}$  NMR (75 MHz,  $\text{CDCl}_3$ )  $\delta$  179.1, 169.1, 141.0, 138.9, 130.9, 128.4, 128.2, 127.6, 127.5, 123.7, 123.6, 109.0, 76.2, 71.1, 71.0, 56.3, 55.1, 54.7, 39.8, 35.5, 30.8, 26.9, 18.8; IR (neat) 3251, 3063, 2932, 1703, 1647, 1558, 1490, 1361, 1115, 1089  $\text{cm}^{-1}$ ; HRMS (ESI)  $m/z$  calcd for  $\text{C}_{25}\text{H}_{29}\text{N}_2\text{O}_4\text{BrNa}$   $[\text{M}+\text{Na}]^+$  523.1208, found 523.1210.

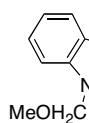

The slower eluting product was repurified by preparative TLC (20% EtOAc in CH<sub>2</sub>Cl<sub>2</sub>) to provide the minor diastereomer. <sup>1</sup>H NMR (300 MHz, CDCl<sub>3</sub>) δ 7.36 (d, 1H, *J* = 7.2 Hz), 7.33-7.30 (m, 6H), 7.06 (app t, 2H, *J* = 7.5 Hz), 6.00 (d, 1H, *J* = 9.6 Hz), 5.15 (d, 1H, *J* = 10.8 Hz), 5.09 (d, 1H, *J* = 10.8 Hz), 4.55 (dd, 1H, *J* = 4.2, 10.2 Hz), 4.52 (d, 1H, *J* = 11.7 Hz), 4.46 (d, 1H, *J* = 11.7 Hz), 4.00 (quintet, 1H, *J* = 4.2 Hz), 3.50 (t, 2H, *J* = 6.9 Hz), 3.33 (s, 3H), 2.76-2.59 (m, 2H), 2.18-2.12 (m, 1H), 2.03-1.81 (m, 4H), 1.68-1.61 (m, 1H); <sup>13</sup>C NMR (75 MHz, CDCl<sub>3</sub>) δ 177.5, 169.8, 141.6, 138.3, 131.8, 128.7, 128.6, 128.2, 127.9, 124.8, 122.8, 109.8, 73.6, 71.6, 70.7, 56.5, 51.6, 50.3, 39.9, 30.6, 27.5, 27.3, 18.5; IR (neat) 3340, 3059, 2939, 2876, 1720, 1655, 1611, 1541, 1466, 1349, 1245, 1086, 914, 746 cm<sup>-1</sup>; HRMS (ESI) *m/z* calcd for C<sub>25</sub>H<sub>29</sub>N<sub>2</sub>O<sub>4</sub>BrNa [M+Na]<sup>+</sup> 523.1208, found 523.1165.

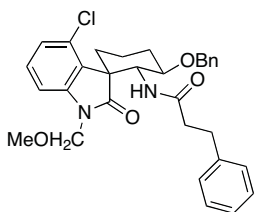

***N*-((1*S*,2*R*,3*R*)-3-(Benzyloxy)-4'-chloro-1'-(methoxymethyl)-2'-oxospiro[cyclohexane-1,3'-indolin]-2-yl)-3-phenylpropanamide (22)**

To a solution of **21** (82 mg, 0.20 mmol) in CH<sub>2</sub>Cl<sub>2</sub> (2.0 mL) was added Cp<sub>2</sub>Zr(H)Cl (63 mg, 0.25 mmol). The reaction mixture was stirred for 15 min. Hydrocinnamoyl chloride (37 μL, 0.25 mmol) was added and the mixture was stirred overnight. The reaction was quenched with saturated NaHCO<sub>3</sub> solution, and extracted with EtOAc (3x). The combined organic layer was dried over Na<sub>2</sub>SO<sub>4</sub>, and concentrated under reduced pressure. The residue was purified by column chromatography (15% EtOAc in hexane to 100% EtOAc, then 5% EtOAc in CH<sub>2</sub>Cl<sub>2</sub>) to give product **22** as single diastereomer (38 mg, 36%, white solid, mp 159.8 °C-161.6 °C): <sup>1</sup>H NMR (300 MHz, CDCl<sub>3</sub>) δ 7.30-7.08 (m, 10H), 6.98 (app d, 2H, *J* = 7.8 Hz), 6.84 (d, 1H, *J* = 7.5 Hz), 5.21 (t, 1H, *J* = 9.6 Hz), 5.06 (d, 1H, *J* = 10.8 Hz), 5.00 (d, 1H, *J* = 10.8 Hz), 4.88 (d, 1H, *J* = 9.3 Hz), 4.69 (d, 1H, *J* = 12.0 Hz), 4.44 (d, 1H, *J* = 12.0 Hz), 4.15 (dt, 1H, *J* = 4.5, 11.1 Hz), 3.26 (s, 3H), 2.72-2.60 (m, 3H), 2.37 (app d, 1H, *J* = 12.6 Hz), 2.21-1.97 (m, 3H), 1.75-1.54 (m, 3H); <sup>13</sup>C NMR (75 MHz, CDCl<sub>3</sub>) δ 178.4, 171.8, 142.8, 141.0, 138.9, 131.8, 129.5, 128.4, 128.3, 128.1, 127.6, 127.5, 126.6, 126.0, 125.3, 107.6, 76.5, 71.1, 70.7, 56.3, 56.2, 52.1, 38.2, 31.3, 30.4, 29.8, 18.5; IR (neat) 3295, 3061, 3028, 2935, 2864, 1715, 1657, 1607, 1456, 1361, 1092 cm<sup>-1</sup>; HRMS (ESI) *m/z* calcd for C<sub>31</sub>H<sub>33</sub>N<sub>2</sub>O<sub>4</sub>ClNa [M+Na]<sup>+</sup> 555.2027, found 555.2047.

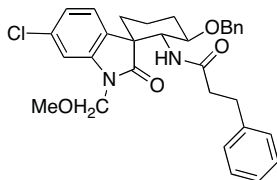

***N*-((1*S*,2*R*,3*R*)-3-(Benzyloxy)-6'-chloro-1'-(methoxymethyl)-2'-oxospiro[cyclohexane-1,3'-indolin]-2-yl)-3-phenylpropanamide (24)**

To a solution of **23** (95 mg, 0.23 mmol) in CH<sub>2</sub>Cl<sub>2</sub> (2.3 mL) was added Cp<sub>2</sub>Zr(H)Cl (73 mg, 0.28 mmol). The reaction mixture was stirred for 15 min. Hydrocinnamoyl chloride (42 μL, 0.28 mmol) was added and the mixture was stirred overnight at rt. The reaction was quenched with saturated NaHCO<sub>3</sub> solution and extracted with EtOAc (3x). The combined organic layer was dried over Na<sub>2</sub>SO<sub>4</sub>, and concentrated under reduced pressure. The residue was purified by column chromatography (15% EtOAc in hexane to 100% EtOAc) to give **24** as single diastereomer (61 mg, 50%, white solid, mp 193.0 °C-195.2 °C). <sup>1</sup>H NMR (300 MHz, CDCl<sub>3</sub>) δ 7.35-7.11 (m, 10H), 6.95-6.93 (m, 3H), 5.01 (s, 2H), 4.95 (d, 1H, *J* = 9.6

Hz), 4.68 (d, 1H,  $J = 12.0$  Hz), 4.58 (d, 1H,  $J = 9.9$  Hz), 4.40 (d, 1H,  $J = 12.0$  Hz), 4.17 (dt, 1H,  $J = 4.5, 10.5$  Hz), 3.24 (s, 3H), 2.66-2.60 (m, 2H), 2.37 (app d, 1H,  $J = 9.9$  Hz), 2.23-1.99 (m, 3H), 1.85 (dt, 1H,  $J = 3.9, 13.8$  Hz), 1.77-1.62 (m, 2H), 1.54-1.49 (m, 1H);  $^{13}\text{C}$  NMR (75 MHz,  $\text{CDCl}_3$ )  $\delta$  179.1, 172.1, 142.1, 140.9, 139.0, 134.0, 129.6, 128.6, 128.5, 127.7, 126.2, 125.1, 123.6, 109.9, 76.2, 71.2, 70.9, 56.3, 54.9, 54.8, 38.2, 35.6, 31.3, 30.8, 18.9; IR (neat) 3249, 3057, 3028, 2935, 2869, 2362, 1707, 1647, 1610, 1549, 1448, 1094  $\text{cm}^{-1}$ ; HRMS (ESI)  $m/z$  calcd for  $\text{C}_{31}\text{H}_{33}\text{N}_2\text{O}_4\text{ClNa}$   $[\text{M}+\text{Na}]^+$  555.2027, found 555.2028.

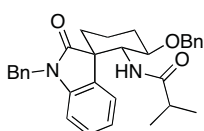

***N*-((1*R*,2*R*,3*R*)-1'-Benzyl-3-(benzyloxy)-2'-oxospiro[cyclohexane-1,3'-indolin]-2-yl)isobutyramide (25)**

To a solution of **8** (120 mg, 0.21 mmol) in  $\text{CH}_2\text{Cl}_2$  (2.1 mL) was added  $\text{Cp}_2\text{Zr}(\text{H})\text{Cl}$  (68 mg, 0.26 mmol). The reaction mixture was stirred for 15 min. Isobutyryl chloride (27  $\mu\text{L}$ , 0.26 mmol) was added and the mixture was stirred for 20 min, followed by addition of  $\text{Sc}(\text{OTf})_3$  (103 mg, 0.21 mmol). After stirring overnight the reaction was quenched with saturated  $\text{NaHCO}_3$  solution and extracted with EtOAc (3x). The combined organic layer was dried over  $\text{Na}_2\text{SO}_4$  and then concentrated under reduced pressure. The residue was purified by column chromatography (5% EtOAc in  $\text{CH}_2\text{Cl}_2$  to 100%) to give the product as four diastereomers (69 mg, 68%). The fastest eluting product was a mixture of two inseparable diastereomers (12 mg, 1:0.72). By comparison to the available spectrum, they are **13** and its epimer at the benzyloxy position. The second fastest eluting product was repurified by preparative TLC (35%

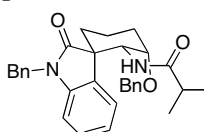

EtOAc in hexane) to yield the minor diastereomer (10 mg):  $^1\text{H}$  NMR (400 MHz,  $\text{CDCl}_3$ )  $\delta$  7.92 (d, 1H,  $J = 7.6$  Hz), 7.38-7.21 (m, 10H), 7.15 (t, 1H,  $J = 7.6$  Hz), 6.88 (t, 1H,  $J = 7.6$  Hz), 6.71 (d, 1H,  $J = 7.6$  Hz), 5.23 (d, 1H,  $J = 9.6$  Hz), 4.96 (d, 1H,  $J = 15.6$  Hz), 4.79 (d, 1H,  $J = 15.6$  Hz), 4.74 (d, 1H,  $J = 11.6$  Hz), 4.70 (dd, 1H,  $J = 3.6, 10.0$  Hz), 4.37 (d, 1H,  $J = 11.2$  Hz), 3.97-3.95 (m, 1H), 2.29 (app dt, 1H,  $J = 3.2, 14.4$  Hz), 2.10-1.95 (m, 3H), 1.77-1.63 (m, 3H), 0.85 (d, 3H,  $J = 7.2$  Hz), 0.81 (d, 3H,  $J = 6.8$  Hz);  $^{13}\text{C}$  NMR (100 MHz,  $\text{CDCl}_3$ )  $\delta$  179.4, 175.7, 143.5, 138.4, 136.3, 130.0, 128.9, 128.7, 128.4, 128.1, 128.0, 127.7, 127.6, 122.0, 108.9, 76.0, 72.0, 53.3, 51.4, 44.2, 35.5, 34.3, 27.6, 19.5, 19.4, 15.9; IR (neat) 3349, 3060, 3031, 2929, 2869, 1715, 1678, 1609, 1494, 1466, 1364, 1207, 1089, 751  $\text{cm}^{-1}$ ; HRMS (EI)  $m/z$  calcd for  $\text{C}_{31}\text{H}_{34}\text{N}_2\text{O}_3$   $[\text{M}]^+$  482.2569, found 482.2567.

The third eluting product **25** was the major diastereomer (47 mg, 46%). All spectral data for this compound were identical to the minor product from the cyclization of **7**.

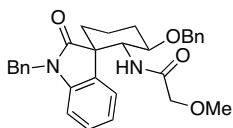

***N*-((1*R*,2*R*,3*R*)-1'-Benzyl-3-(benzyloxy)-2'-oxospiro[cyclohexane-1,3'-indolin]-2-yl)-2-methoxyacetamide (26)**

To a solution of **8** (114 mg, 0.20 mmol) in  $\text{CH}_2\text{Cl}_2$  (2.0 mL) was added  $\text{Cp}_2\text{Zr}(\text{H})\text{Cl}$  (65 mg, 0.25 mmol). The reaction mixture was stirred for 15 min. Methoxyacetyl chloride (23  $\mu\text{L}$ , 0.25 mmol) was added and the mixture was stirred for 20 min, followed by addition of  $\text{Sc}(\text{OTf})_3$  (96 mg, 0.20 mmol). After stirring overnight, the reaction was quenched with saturated  $\text{NaHCO}_3$  solution and extracted with EtOAc (3x). The combined organic layer was dried over  $\text{Na}_2\text{SO}_4$ , and then concentrated under reduced pressure. The residue was purified by column chromatography (5% EtOAc in  $\text{CH}_2\text{Cl}_2$  to 100% EtOAc) to give product as four

diastereomers (65 mg, 67%). The fastest eluting product was minor diastereomer **14** (3 mg). The second fastest eluting product was the minor diastereomer (2 mg) which was the epimer of **14** at the benzyloxyl position as shown before. The last eluting fraction was a mixture of two inseparable diastereomers (60 mg, 1:2.1), which were repurified by preparative TLC (10% EtOAc in CH<sub>2</sub>Cl<sub>2</sub>) for characterization purpose, and give the third eluting product as the minor diastereomer, <sup>1</sup>H NMR (600 MHz, CDCl<sub>3</sub>) δ 7.90 (d, 1H, *J* =

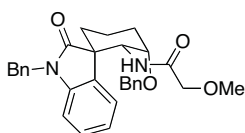

7.2 Hz), 7.34-7.23 (m, 10H), 7.15 (t, 1H, *J* = 7.8 Hz), 6.87 (t, 1H, *J* = 7.2 Hz), 6.72 (d, 1H, *J* = 7.8 Hz), 6.45 (d, 1H, *J* = 10.2 Hz), 5.10 (d, 1H, *J* = 15.0 Hz), 4.75 (dd, 1H, *J* = 3.6, 10.2 Hz), 4.73 (d, 1H, *J* = 11.4 Hz), 4.42 (d, 1H, *J* = 11.4 Hz), 3.94 (m, 1H), 3.68 (d, 1H, *J* = 15.0 Hz), 3.49 (d, 1H, *J* = 15.0 Hz), 2.28 (app d, 1H, *J* = 13.8 Hz), 2.10-1.98 (m, 2H), 1.74 (app t, 1H, *J* = 13.2 Hz), 1.68 (app d, 2H, *J* = 11.9 Hz). The slow eluting product was the major diastereomer **26** and was isolated as a white solid (mp 164.2 °C-165.8 °C): <sup>1</sup>H NMR (600 MHz, DMSO) δ 7.61 (d, 1H, *J* = 7.8 Hz), 7.31-7.28 (m, 5H), 7.26-7.22 (m, 6H), 7.06 (d, 1H, *J* = 7.2 Hz), 6.92 (d, 1H, *J* = 7.8 Hz), 6.11 (d, 1H, *J* = 10.2 Hz), 5.00 (d, 1H, *J* = 15.6 Hz), 4.70 (d, 1H, *J* = 15.6 Hz), 4.64 (d, 1H, *J* = 12.0 Hz), 4.45 (d, 1H, *J* = 12.0 Hz), 4.43 (t, 1H, *J* = 10.8 Hz), 3.86 (dt, 1H, *J* = 4.2, 10.8 Hz), 3.57 (d, 1H, *J* = 15.6 Hz), 3.43 (d, 1H, *J* = 15.6 Hz), 2.81 (s, 3H), 2.41 (app d, 1H, *J* = 15.6 Hz), 1.93-1.78 (m, 3H), 1.51-1.44 (m, 2H); <sup>13</sup>C NMR (100 MHz, DMSO) δ 177.1, 168.2, 142.9, 139.1, 136.4, 129.4, 128.5, 128.4, 128.0, 127.3, 127.2, 127.1, 125.6, 122.0, 109.2, 77.2, 71.1, 70.2, 58.2, 54.1, 53.8, 42.7, 33.5, 30.7, 19.6; IR (neat) 3271, 3060, 3031, 2929, 2853, 1714, 1608, 1521, 1464, 1364, 1113, 1070, 737 cm<sup>-1</sup>; HRMS (ESI) *m/z* calcd for C<sub>30</sub>H<sub>32</sub>N<sub>2</sub>O<sub>4</sub>Na [M+Na]<sup>+</sup> 507.2260, found 507.2251.

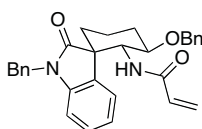

***N*-((1*R*,2*R*,3*R*)-1'-Benzyl-3-(benzyloxy)-2'-oxospiro[cyclohexane-1,3'-indolin]-2-yl)acrylamide (**27**)**

To a solution of **8** (105 mg, 0.19 mmol) in CH<sub>2</sub>Cl<sub>2</sub> (1.9 mL) was added Cp<sub>2</sub>Zr(H)Cl (60 mg, 0.23 mmol). The reaction mixture was stirred for 15 min. Acryloyl chloride (19 μL, 0.23 mmol) was added and the mixture was stirred for 20 min, followed by addition of Sc(OTf)<sub>3</sub> (93 mg, 0.20 mmol). After stirring overnight, the reaction was quenched with saturated NaHCO<sub>3</sub> solution and extracted with EtOAc (3x). The combined organic layer was dried over Na<sub>2</sub>SO<sub>4</sub>, and then concentrated under reduced pressure. The residue was purified by column chromatography (5% EtOAc in CH<sub>2</sub>Cl<sub>2</sub> to 100% EtOAc) to give product as four diastereomers (33 mg, 38%). The fastest eluting product **15** was the minor diastereomer (1 mg). The second fastest eluting product was a mixture of two inseparable diastereomers (6 mg, 1:1). The third eluting product **27** was the major diastereomer (26 mg). This product showed identical spectral data to the minor product from the cyclization of **7**.

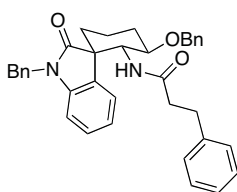

***N*-((1*R*,2*R*,3*R*)-1'-Benzyl-3-(benzyloxy)-2'-oxospiro[cyclohexane-1,3'-indolin]-2-yl)-3-phenylpropanamide (**12**)**

To a solution of **8** (113 mg, 0.20 mmol) in CH<sub>2</sub>Cl<sub>2</sub> (2.0 mL) was added Cp<sub>2</sub>Zr(H)Cl (65 mg, 0.25 mmol). The reaction mixture was stirred for 15 min. Hydrocinnamoyl chloride (37 μL, 0.25 mmol) was added and the mixture was stirred for 20 min, followed by addition of Sc(OTf)<sub>3</sub> (98 mg, 0.20 mmol). After stirring overnight, the reaction was

quenched with saturated NaHCO<sub>3</sub> solution and extracted with EtOAc (3x). The combined organic layer was dried over Na<sub>2</sub>SO<sub>4</sub> and then concentrated under reduced pressure. The residue was purified by column chromatography (5% to 100% EtOAc in CH<sub>2</sub>Cl<sub>2</sub>) to give product as four diastereomers (72 mg, 66%). The fastest eluting product was a mixture of two inseparable diastereomers (13 mg, 1:1). By comparing with the available spectra, they are **11** and its epimer at the benzyloxy position.

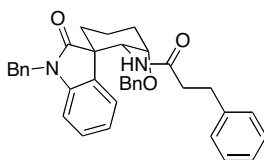

The second fastest eluting product was *syn*-diastereomer **28** (8 mg), <sup>1</sup>H NMR (400 MHz, CDCl<sub>3</sub>) δ 7.90 (d, 1H, *J* = 7.6 Hz), 7.35-7.12 (m, 14H), 7.03 (app d, 2H, *J* = 7.2 Hz), 6.87 (dt, 1H, *J* = 3.6, 7.6 Hz), 6.71 (d, 1H, *J* = 8.0 Hz), 5.16 (d, 1H, *J* = 9.6 Hz), 5.05 (d, 1H, *J* = 15.6 Hz), 4.75 (dd, 1H, *J* = 4.0, 10.0 Hz), 4.68 (d, 1H, *J* = 15.6 Hz), 4.64 (d, 1H, *J* = 11.2 Hz), 4.20 (d, 1H, *J* = 11.2 Hz), 3.87-3.86 (m, 1H), 2.75-2.61 (m, 2H), 2.25 (d, 1H, *J* = 14.0 Hz), 2.20-2.12 (m, 1H), 2.09-1.93 (m, 3H), 1.76-1.72 (m, 1H), 1.66-1.62 (m, 2H); <sup>13</sup>C NMR (100 MHz, CDCl<sub>3</sub>) δ 179.3, 171.0, 143.4, 141.0, 138.4, 136.3, 129.9, 128.9, 128.7, 128.6, 128.4, 128.4, 128.2, 128.0, 128.0, 127.8, 127.6, 126.3, 122.1, 109.0, 76.2, 71.9, 53.2, 51.7, 44.2, 38.0, 34.3, 31.3, 27.7, 15.9; IR (neat) 3087, 3029, 2936, 2866, 1711, 1670, 1609, 1494, 1466, 1364, 733 cm<sup>-1</sup>; HRMS (ESI) *m/z* calcd for C<sub>36</sub>H<sub>36</sub>N<sub>2</sub>O<sub>3</sub>Na [M+Na]<sup>+</sup> 567.2624, found 567.2598. The third eluting product **12** was the major diastereomer (51 mg). All spectral data for this compound were identical to those from the minor isomer of the cyclization of **7**.

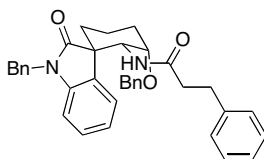

***N*-((1*R*,2*R*,3*S*)-1'-Benzyl-3-(benzyloxy)-2'-oxospiro[cyclohexane-1,3'-indolin]-2-yl)-3-phenylpropanamide (**28**)**

To a solution of **8** (62 mg, 0.11 mmol) in CH<sub>2</sub>Cl<sub>2</sub> (1.1 mL) was added Cp<sub>2</sub>Zr(H)Cl (35 mg, 0.13 mmol). The reaction mixture was stirred for 15 min. Hydrocinnamoyl chloride (19 μL, 0.13 mmol) was added and the mixture was stirred for 20 min, followed by addition of ZnCl<sub>2</sub> (0.13 mL 1M solution). After stirring overnight at room temperature, the reaction was quenched with saturated NaHCO<sub>3</sub> solution and extracted with EtOAc (3x). The combined organic layer was dried over Na<sub>2</sub>SO<sub>4</sub>, and then concentrated under reduced pressure. The residue was purified by column chromatography (5% EtOAc in CH<sub>2</sub>Cl<sub>2</sub> to 100% EtOAc) to give the product as four diastereomers (33 mg, 66%). The fastest eluting product was a mixture of two inseparable diastereomers (2 mg, 3:2). By comparing with the available spectrum, they are **11** and its epimer at the benzyloxy position. The second fastest eluting material was the major product **28** (22 mg) and the third eluting product **12** as the minor product (11 mg). All spectral data were consistent with products that had previously been prepared.

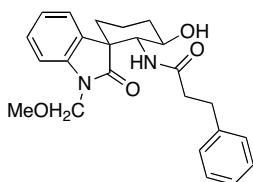

***N*-((1*S*,2*R*,3*R*)-3-Hydroxy-1'-(methoxymethyl)-2'-oxospiro[cyclohexane-1,3'-indolin]-2-yl)-3-phenylpropanamide**

To a solution of **17** (50 mg, 0.10 mmol) in EtOH/EtOAc (2 mL, 1:1) was added Pd/C (7 mg). The atmosphere was exchanged with H<sub>2</sub> and the mixture was stirred for 24 h. The suspension was diluted with EtOAc then was filtered through a short pad of silica gel. Removal of the solvent provided the alcohol as a white solid (29 mg, 71%, mp 219.2 °C-220.8 °C) that was directly used for next step without further purification: <sup>1</sup>H NMR

(300 MHz, DMSO)  $\delta$  7.30 (d, 2H,  $J = 7.5$  Hz), 7.22-6.89 (m, 7H), 5.08 (d, 1H,  $J = 10.8$  Hz), 4.98 (d, 1H,  $J = 11.1$  Hz), 4.40 (d, 1H,  $J = 5.1$  Hz), 4.25-4.15 (m, 2H), 3.19 (s, 3H), 2.31-2.23 (m, 2H), 2.11-2.00 (m, 4H), 1.92-1.83 (m, 1H), 1.62-1.45 (m, 3H);  $^{13}\text{C}$  NMR (75 MHz, DMSO)  $\delta$  178.1, 171.7, 141.5, 141.4, 131.4, 128.2, 127.9, 127.4, 125.6, 123.7, 122.2, 108.4, 70.5, 66.7, 56.9, 55.5, 53.9, 37.1, 34.8, 34.2, 31.3, 18.7; IR (neat) 3424, 3269, 2938, 1694, 1640, 1554, 1453, 1369, 1077  $\text{cm}^{-1}$ ; HRMS (ESI)  $m/z$  calcd for  $\text{C}_{24}\text{H}_{28}\text{N}_2\text{O}_4\text{Na}$   $[\text{M}+\text{Na}]^+$  431.1947, found 431.1955.

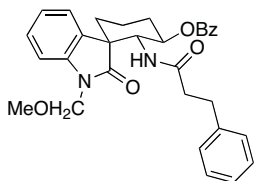

**(1S,2R,3R)-1'-(Methoxymethyl)-2'-oxo-2-(3-phenylpropanamido)spiro[cyclohexane-1,3'-indolin]-3-yl benzoate (29)**

To a solution of the alcohol (11mg, 0.027 mmol) and a catalytic amount of DMAP in pyridine (0.5 mL) was added benzoyl chloride (31  $\mu\text{L}$ , 0.27 mmol). The mixture was stirred for 30 h, then another portion of benzoyl chloride (31  $\mu\text{L}$ , 0.27 mmol) was added. After 18 h the temperature was raised to 60  $^{\circ}\text{C}$ . After stirring for 4 h the mixture was diluted with EtOAc, and then washed with saturated  $\text{NaHCO}_3$  solution. After removal of the solvent, the residue was purified by flash chromatography (20% to 40% EtOAc in hexane) to yield benzoate **29** (10 mg, 72%):  $^1\text{H}$  NMR (400 MHz,  $\text{CDCl}_3$ )  $\delta$  8.12 (d, 1H,  $J = 7.2$  Hz), 8.02 (d, 2H,  $J = 7.2$  Hz), 7.62 (t, 1H,  $J = 7.6$  Hz), 7.55 (t, 1H,  $J = 7.6$  Hz), 7.48 (t, 1H,  $J = 7.6$  Hz), 7.45-7.40 (m, 3H), 7.16 (t, 1H,  $J = 7.6$  Hz), 7.11-7.04 (m, 3H), 6.96 (d, 1H,  $J = 7.6$  Hz), 6.80-6.78 (m, 2H), 5.97 (dt, 1H,  $J = 4.8, 10.8$  Hz), 5.50 (d, 1H,  $J = 10.0$  Hz), 5.12 (d, 1H,  $J = 10.8$  Hz), 5.09 (d, 1H,  $J = 10.8$  Hz), 4.83 (t, 1H,  $J = 10.4$  Hz), 2.46-2.37 (m, 2H), 2.35-2.26 (m, 2H), 2.03-1.93 (m, 3H), 1.89-1.75 (m, 3H);  $^{13}\text{C}$  NMR (100 MHz,  $\text{CDCl}_3$ )  $\delta$  178.8, 172.3, 167.0, 141.3, 140.8, 133.8, 133.4, 130.7, 130.4, 130.1, 130.0, 128.7, 128.6, 128.5, 128.0, 126.1, 123.9, 123.8, 109.3, 71.9, 71.3, 56.4, 55.1, 54.8, 38.3, 35.5, 31.5, 31.2, 19.0; IR (neat) 3350, 3062, 3030, 2935, 1713, 1613, 1537, 1361, 1273, 1117, 713  $\text{cm}^{-1}$ ; HRMS (ESI)  $m/z$  calcd for  $\text{C}_{31}\text{H}_{32}\text{N}_2\text{O}_5\text{Na}$   $[\text{M}+\text{Na}]^+$  535.2209, found 535.2236.

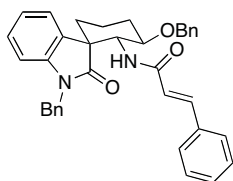

**N-((1S,2R,3R)-1'-Benzyl-3-(benzyloxy)-2'-oxospiro[cyclohexane-1,3'-indolin]-2-yl)cinnamamide (30)**

To a solution of **15** (30 mg, 0.06 mmol) in DMF (0.5 mL) in a sealed tube was added  $\text{Pd}(\text{OAc})_2$  (0.7 mg),  $\text{PPh}_3$  (1.7 mg, 0.0064 mmol), iodobenzene (7.2  $\mu\text{L}$ , 0.06 mmol) and  $\text{Cs}_2\text{CO}_3$  (23 mg, 0.07 mmol). The atmosphere was exchanged with argon, then the tube was sealed and immersed in a preheated oil bath (120  $^{\circ}\text{C}$ ). The reaction stirred for 12 h, then the mixture was diluted with EtOAc and washed with brine (2x). The organic layer was dried over  $\text{Na}_2\text{SO}_4$  and the solvent was removed under reduced pressure. The residue was purified by chromatography (10% to 50% EtOAc in hexane) to yield **30** as a slightly red solid (25 mg, 72%, mp 185.4  $^{\circ}\text{C}$ -189.8  $^{\circ}\text{C}$ ).  $^1\text{H}$  NMR (400 MHz,  $\text{CDCl}_3$ )  $\delta$  7.44 (d, 1H,  $J = 8.0$  Hz), 7.39-7.35 (m, 6H), 7.31-7.24 (m, 9H), 7.16-7.08 (m, 2H), 6.68 (d, 1H,  $J = 8.0$  Hz), 5.82 (d, 1H,  $J = 15.6$  Hz), 5.00 (app d, 2H,  $J = 15.6$  Hz), 4.83 (d, 1H,  $J = 15.6$  Hz), 4.76-4.71 (m, 2H), 4.49 (d, 1H,  $J = 12.0$  Hz), 4.29 (dt, 1H,  $J = 4.8, 10.8$  Hz), 2.44 (d, 1H,  $J = 12.8$  Hz), 2.23 (qt, 1H,  $J = 3.6, 13.6$  Hz), 1.94 (dt, 1H,  $J = 4.0, 14.0$  Hz), 1.85 (app d, 1H,  $J = 14.0$  Hz), 1.78-1.73 (m, 1H), 1.66-1.59 (m, 1H);  $^{13}\text{C}$  NMR (75 MHz,  $\text{CDCl}_3$ )  $\delta$  178.8, 165.6, 142.0, 141.0, 139.1, 136.3, 134.9, 131.9, 129.8, 129.0, 128.9, 128.5, 128.2,

128.0, 127.9, 127.8, 127.5, 127.3, 123.8, 123.4, 120.5, 108.8, 76.7, 71.0, 55.4, 54.5, 43.5, 35.3, 31.0, 19.1; IR (neat) 3304, 3060, 3030, 2932, 2864, 1699, 1663, 1612, 1492, 1366, 1209, 1027, 1098, 978, 910, 734  $\text{cm}^{-1}$ ; HRMS (ESI)  $m/z$  calcd for  $\text{C}_{36}\text{H}_{34}\text{N}_2\text{O}_3\text{Na}$   $[\text{M}+\text{Na}]^+$  565.2467, found 565.2432.

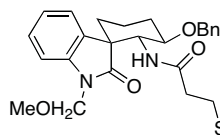

***N*-((1*S*,2*R*,3*R*)-3-(Benzyloxy)-1'-(methoxymethyl)-2'-oxospiro[cyclohexane-1,3'-indolin]-2-yl)-3-(propylthio)propanamide (31)**

To a suspension of NaH (6 mg, 0.15 mmol) in THF (0.6 mL) at 0 °C under argon was added 1-propanethiol (10  $\mu\text{L}$ , 0.11 mmol). After 15 min a solution of **19** (31 mg, 0.074 mmol) in THF (0.6 mL) was added dropwise at 0 °C. The ice bath was removed and the reaction stirred at for 1 h. The reaction mixture was quenched with water and extracted with EtOAc (2x). The combined organic layer was dried over  $\text{Na}_2\text{SO}_4$  and the solvent was removed under reduced pressure. The residue was purified by chromatography (5% to 15% EtOAc in  $\text{CH}_2\text{Cl}_2$ ) to give sulfide **31** (26 mg, 71%):  $^1\text{H}$  NMR (400 MHz,  $\text{CDCl}_3$ )  $\delta$  7.36 (d, 1H,  $J = 7.2$  Hz), 7.32-7.24 (m, 5H), 7.22 (d, 1H,  $J = 7.6$  Hz), 7.11 (t, 1H,  $J = 7.6$  Hz), 6.93 (d, 1H,  $J = 7.6$  Hz), 5.25 (d, 1H,  $J = 9.6$  Hz), 5.11 (d, 1H,  $J = 10.8$  Hz), 5.08 (d, 1H,  $J = 10.8$  Hz), 4.70 (d, 1H,  $J = 12.0$  Hz), 4.58 (t, 1H,  $J = 10.0$  Hz), 4.49 (d, 1H,  $J = 12.0$  Hz), 4.21 (dt, 1H,  $J = 4.8, 10.8$  Hz), 3.23 (s, 3H), 2.43-2.36 (m, 2H), 2.30-2.23 (m, 3H), 2.15-2.06 (m, 2H), 2.01-1.93 (m, 1H), 1.88 (dt, 1H,  $J = 3.6, 14.0$  Hz), 1.78 (app d, 1H,  $J = 14.4$  Hz), 1.71-1.68 (m, 1H), 1.60-1.55 (m, 1H), 1.47 (sextet, 2H,  $J = 7.2$  Hz), 0.91 (t, 3H,  $J = 7.2$  Hz);  $^{13}\text{C}$  NMR (75 MHz,  $\text{CDCl}_3$ )  $\delta$  179.3, 171.2, 141.2, 139.1, 131.2, 128.5, 128.3, 127.7, 127.6, 123.9, 123.7, 109.0, 76.4, 71.3, 71.1, 56.4, 55.3, 54.9, 37.0, 35.6, 34.2, 31.0, 27.6, 22.9, 19.0, 13.6; IR (neat) 3247, 3061, 2932, 2869, 1706, 1643, 1555, 1491, 1362, 1294, 1116, 1088, 740  $\text{cm}^{-1}$ ; HRMS (ESI)  $m/z$  calcd for  $\text{C}_{28}\text{H}_{36}\text{N}_2\text{O}_4\text{NaS}$   $[\text{M}+\text{Na}]^+$  519.2293, found 519.2319.

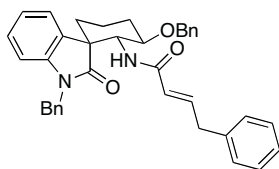

***(E)*-*N*-((1*S*,2*R*,3*R*)-1'-Benzyl-3-(benzyloxy)-2'-oxospiro[cyclohexane-1,3'-indolin]-2-yl)-4-phenylbut-2-enamide (32)**

To a solution of **15** (23 mg, 0.05 mmol) in  $\text{CH}_2\text{Cl}_2$  (1 mL) in a sealed tube were added the second generation Hoveyda-Grubbs catalyst (2 mg) and allylbenzene (19  $\mu\text{L}$ , 0.15 mmol). The atmosphere was exchanged with argon, then the tube was immersed in a preheated oil bath (41 °C). The reaction was stirred for 18 h, then the solvent was removed under reduced pressure and the residue was purified by preparative TLC (5% EtOAc in  $\text{CH}_2\text{Cl}_2$ ) to yield **32** (11 mg, 40%, 51% brsm) and starting material (5 mg):  $^1\text{H}$  NMR (400 MHz,  $\text{CDCl}_3$ )  $\delta$  7.40 (d, 1H,  $J = 7.6$  Hz), 7.33-7.22 (m, 13H), 7.16-7.06 (m, 4H), 6.75 (dt, 1H,  $J = 6.8, 15.2$  Hz), 6.66 (d, 1H,  $J = 7.6$  Hz), 5.27 (d, 1H,  $J = 15.2$  Hz), 4.96 (d, 1H,  $J = 15.6$  Hz), 4.91 (d, 1H,  $J = 10.0$  Hz), 4.80 (d, 1H,  $J = 15.6$  Hz), 4.70 (d, 1H,  $J = 12.0$  Hz), 4.68 (t, 1H,  $J = 10.0$  Hz), 4.47 (d, 1H,  $J = 12.0$  Hz), 4.24 (dt, 1H,  $J = 4.4, 10.4$  Hz), 3.39 (t, 1H,  $J = 6.4$  Hz), 2.41 (d, 1H,  $J = 10.0$  Hz), 2.19 (q, 1H,  $J = 13.2$  Hz), 1.91 (dt, 1H,  $J = 3.6, 14.0$  Hz), 1.82 (app d, 1H,  $J = 14.0$  Hz), 1.74-1.70 (m, 1H), 1.62-1.55 (m, 1H);  $^{13}\text{C}$  NMR (100 MHz,  $\text{CDCl}_3$ )  $\delta$  178.8, 165.7, 143.1, 142.0, 139.1, 138.2, 136.2, 131.9, 129.0, 129.0, 128.9, 128.4, 128.1, 127.8, 127.8, 127.5, 127.2, 126.7, 124.6, 123.8, 123.4, 108.7, 76.7, 70.9, 55.3, 54.4, 43.5, 38.3, 35.5, 30.9, 19.1; IR (neat) 3416, 3060, 3029, 2931, 2864,



1696, 1640, 1612, 1537, 1493, 1365, 1174, 1098, 980  $\text{cm}^{-1}$ ; HRMS (ESI)  $m/z$  calcd for  $\text{C}_{37}\text{H}_{36}\text{N}_2\text{O}_3\text{Na}$   $[\text{M}+\text{Na}]^+$  579.2624, found 579.2679.

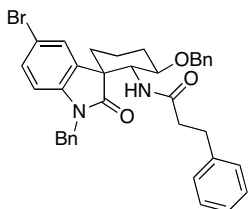

***N*-((1*S*,2*R*,3*R*)-1'-Benzyl-3-(benzyloxy)-5'-bromo-2'-oxospiro[cyclohexane-1,3'-indolin]-2-yl)-3-phenylpropanamide**

To a solution of **11** (250 mg, 0.46 mmol) in  $\text{CH}_2\text{Cl}_2$  (9 mL) was added NBS (82 mg, 0.46 mmol) at 0 °C. The ice bath was removed and the mixture was stirred for 1h. NBS (20 mg, 0.11 mmol) was added and after 40 min the solvent was removed under reduced pressure. The residue was purified by chromatography (15% to 30% EtOAc in hexane) to give the aryl bromide as white solid (170 mg, 59%).  $^1\text{H}$  NMR (400 MHz,  $\text{CDCl}_3$ ) 7.51 (d, 1H,  $J = 2.0$  Hz), 7.34-7.11 (m, 14H), 6.92 (app d, 2H,  $J = 6.8$  Hz), 6.53 (d, 1H,  $J = 8.0$  Hz), 4.89 (d, 1H,  $J = 16.0$  Hz), 4.88 (d, 1H,  $J = 8.4$  Hz), 4.74 (d, 1H,  $J = 15.6$  Hz), 4.67 (d, 1H,  $J = 12.0$  Hz), 4.57 (t, 1H,  $J = 10.0$  Hz), 4.44 (d, 1H,  $J = 12.0$  Hz), 4.21 (dt, 1H,  $J = 4.4, 10.4$  Hz), 2.56 (t, 2H,  $J = 8.0$  Hz), 2.39 (app dd, 1H,  $J = 3.2, 12.8$  Hz), 2.16 (qt, 1H,  $J = 3.6, 9.2$  Hz), 2.06 (quint, 1H,  $J = 7.6$  Hz), 1.93 (app dd, 1H,  $J = 7.6, 14.8$  Hz), 1.84 (dt, 1H,  $J = 4.0, 12.8$  Hz), 1.79 (app d, 1H,  $J = 12.8$  Hz), 1.71 (app dt, 1H,  $J = 3.2, 14.0$  Hz), 1.62-1.52 (m, 1H);  $^{13}\text{C}$  NMR (100 MHz,  $\text{CDCl}_3$ )  $\delta$  178.1, 171.9, 141.0, 140.9, 139.0, 135.8, 133.9, 131.1, 129.1, 128.5, 128.4, 128.2, 127.6, 127.6, 127.3, 127.2, 126.1, 115.9, 110.0, 76.2, 70.7, 55.0, 54.6, 43.6, 38.0, 35.1, 31.2, 30.7, 18.9; IR (neat) 3306, 3062, 3029, 2931, 2864, 1702, 1606, 1484, 1426, 1358, 1205, 1169, 1098, 737  $\text{cm}^{-1}$ ; HRMS (ESI)  $m/z$  calcd for  $\text{C}_{36}\text{H}_{35}\text{N}_2\text{O}_3\text{NaBr}$   $[\text{M}+\text{Na}]^+$  645.1729, found 645.1726.

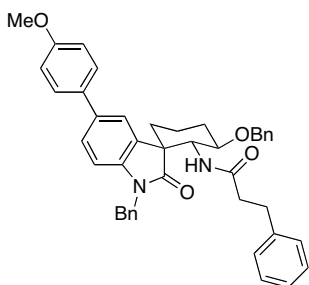

***N*-((1*S*,2*R*,3*R*)-1'-Benzyl-3-(benzyloxy)-5'-(4-methoxyphenyl)-2'-oxospiro[cyclohexane-1,3'-indolin]-2-yl)-3-phenylpropanamide (**33**)**

To a solution (40 mg, 0.06 mmol) of the aryl bromide in  $\text{THF}/\text{H}_2\text{O}$  (1 mL, 3:1) in a sealed tube was added  $(\text{PPh}_3)_4\text{Pd}$  (7 mg, 0.006 mmol), 4-methoxyphenylboronic acid (20 mg, 0.13 mmol), and  $\text{Na}_2\text{CO}_3$  (27 mg, 0.26 mmol). The atmosphere was exchanged for argon then the tube was sealed and immersed in a preheated oil bath (66 °C). The reaction stirred at 66 °C for 5 h, then the solution was extracted with EtOAc (2x). The combined organic layer was dried over  $\text{Na}_2\text{SO}_4$ . After removal of the solvent under reduced pressure, the residue was purified by flash chromatography (15% to 30% EtOAc in hexane) to give biaryl **33** (37 mg, 89%):  $^1\text{H}$  NMR (300 MHz,  $\text{CDCl}_3$ ) 7.60 (d, 1H,  $J = 1.8$  Hz), 7.52 (app d, 2H,  $J = 8.7$  Hz), 7.35-7.21 (m, 11H), 7.15-7.10 (m, 3H), 6.97 (app d, 2H,  $J = 8.7$  Hz), 6.87 (app d, 2H,  $J = 7.8$  Hz), 6.74 (d, 1H,  $J = 8.1$  Hz), 5.00 (d, 1H,  $J = 10.2$  Hz), 4.94 (d, 1H,  $J = 15.6$  Hz), 4.84 (d, 1H,  $J = 15.6$  Hz), 4.74 (t, 1H,  $J = 10.2$  Hz), 4.71 (d, 1H,  $J = 12.0$  Hz), 4.47 (d, 1H,  $J = 12.0$  Hz), 4.29 (dt, 1H,  $J = 4.2, 10.5$  Hz), 3.85 (s, 3H), 2.56-2.37 (m, 3H), 2.22 (qt, 1H,  $J = 3.6, 12.6$  Hz), 2.14-2.04 (m, 1H), 2.00-1.83 (m, 3H), 1.80-1.69 (m, 2H), 1.61-1.56 (m, 1H);  $^{13}\text{C}$  NMR (75 MHz,  $\text{CDCl}_3$ )  $\delta$  178.7, 172.0, 159.1, 141.0, 140.8, 139.2, 136.3, 136.3, 133.8, 132.3, 129.1, 128.5, 128.5, 128.3, 128.2, 127.9, 127.5, 127.3, 126.6, 126.1, 122.9, 114.4, 108.7, 76.4, 70.8, 55.5, 55.3, 54.6, 43.7, 38.2, 35.4, 31.5, 31.0, 19.0; IR (neat) 3324, 3062, 3030, 2933, 2864, 1696, 1612, 1543, 1491, 1453, 1365, 1247, 1100,

1027, 909, 813, 732  $\text{cm}^{-1}$ ; HRMS (EI)  $m/z$  calcd for  $\text{C}_{43}\text{H}_{42}\text{N}_2\text{O}_4$   $[\text{M}]^+$  650.3144, found 650.3148.

ch12-103 301a

7.376  
7.371  
7.359  
7.346  
5.834  
5.800  
5.777  
5.765  
5.755  
5.743  
5.721  
5.045  
5.039  
5.034  
4.988  
4.987  
4.982  
4.956  
4.952  
4.949  
4.882  
4.843  
4.553  
4.514  
4.176  
4.155  
4.133  
2.105  
2.101  
2.081  
2.057  
2.035  
1.914  
1.898  
1.893  
1.888  
1.876  
1.868  
1.865  
1.846  
1.844  
1.552  
1.525  
1.521  
1.504  
1.497  
1.473  
1.458  
1.435  
1.413  
1.408  
1.394  
1.389  
1.383

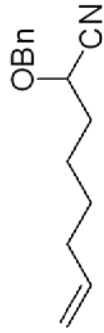

5

618

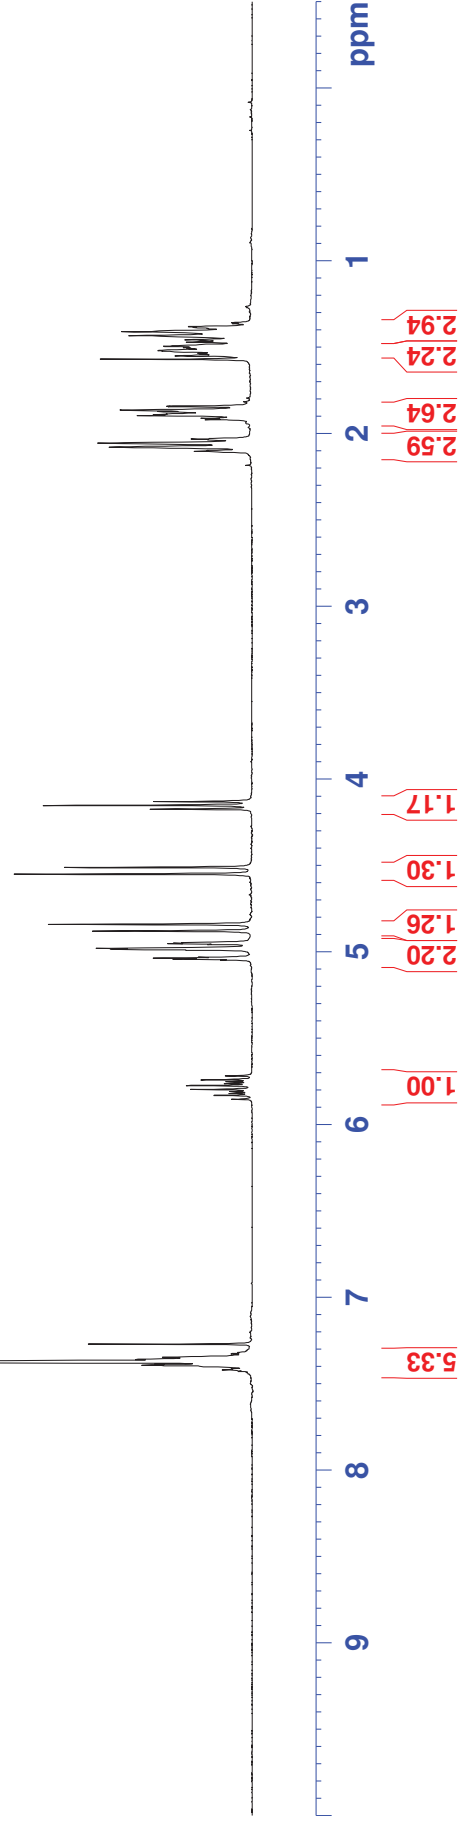

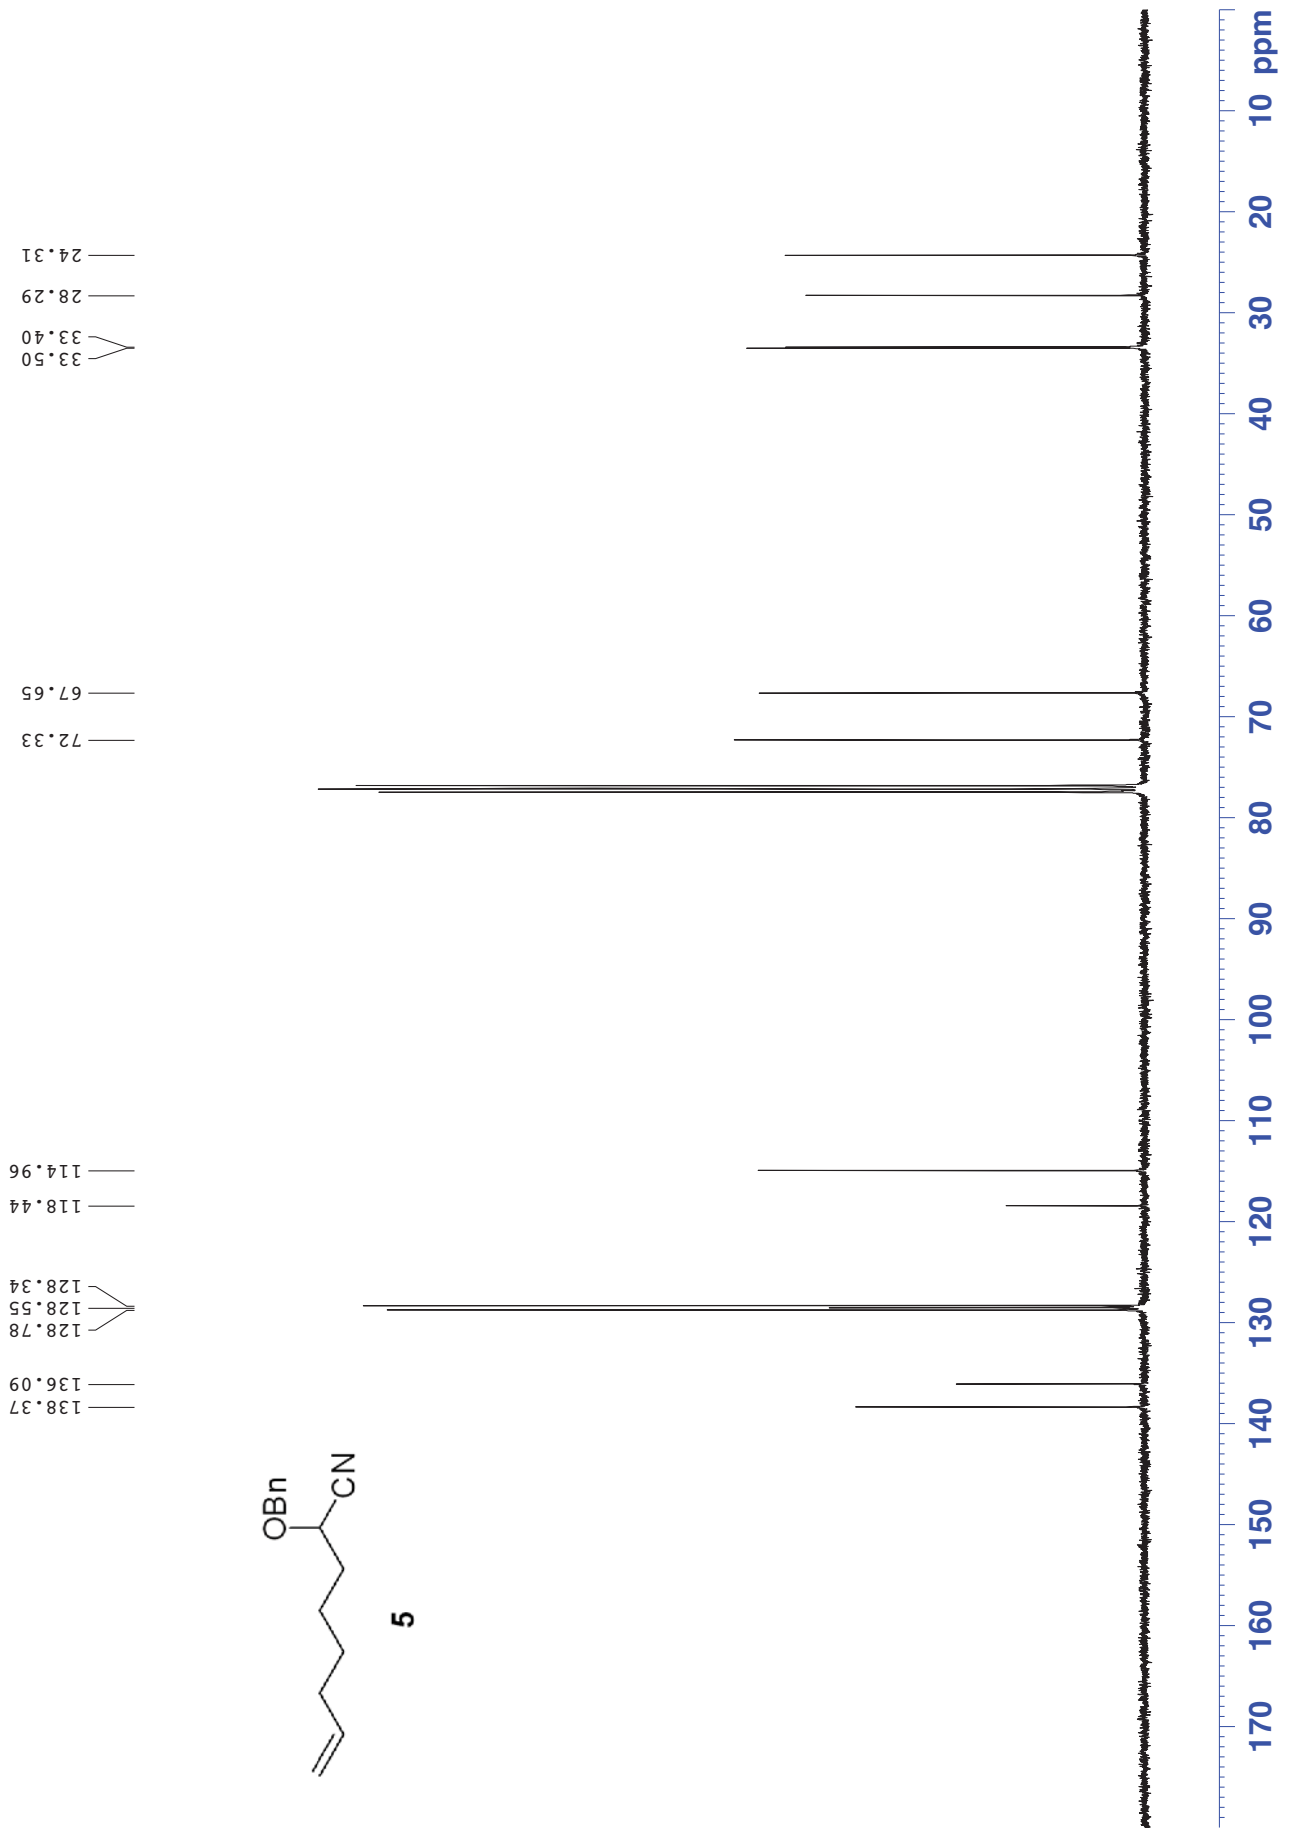

ch12-127 301a

7.590  
7.565  
7.368  
7.352  
7.348  
7.336  
7.326  
7.305  
7.280  
7.254  
7.204  
7.181  
7.157  
7.127  
7.123  
7.117  
7.105  
7.098  
7.096  
7.083  
6.894  
5.279  
4.850  
4.812  
4.514  
4.476  
4.186  
4.167  
4.147  
2.822  
2.800  
2.779  
1.954  
1.949  
1.942  
1.921  
1.909

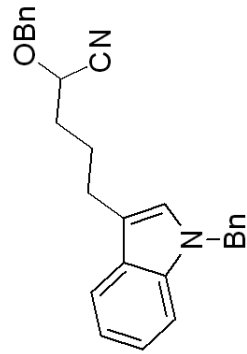

125

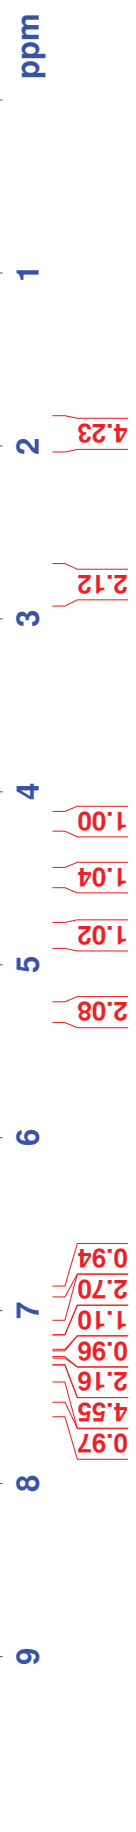

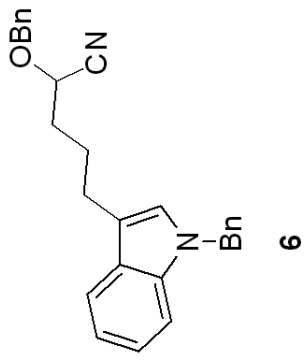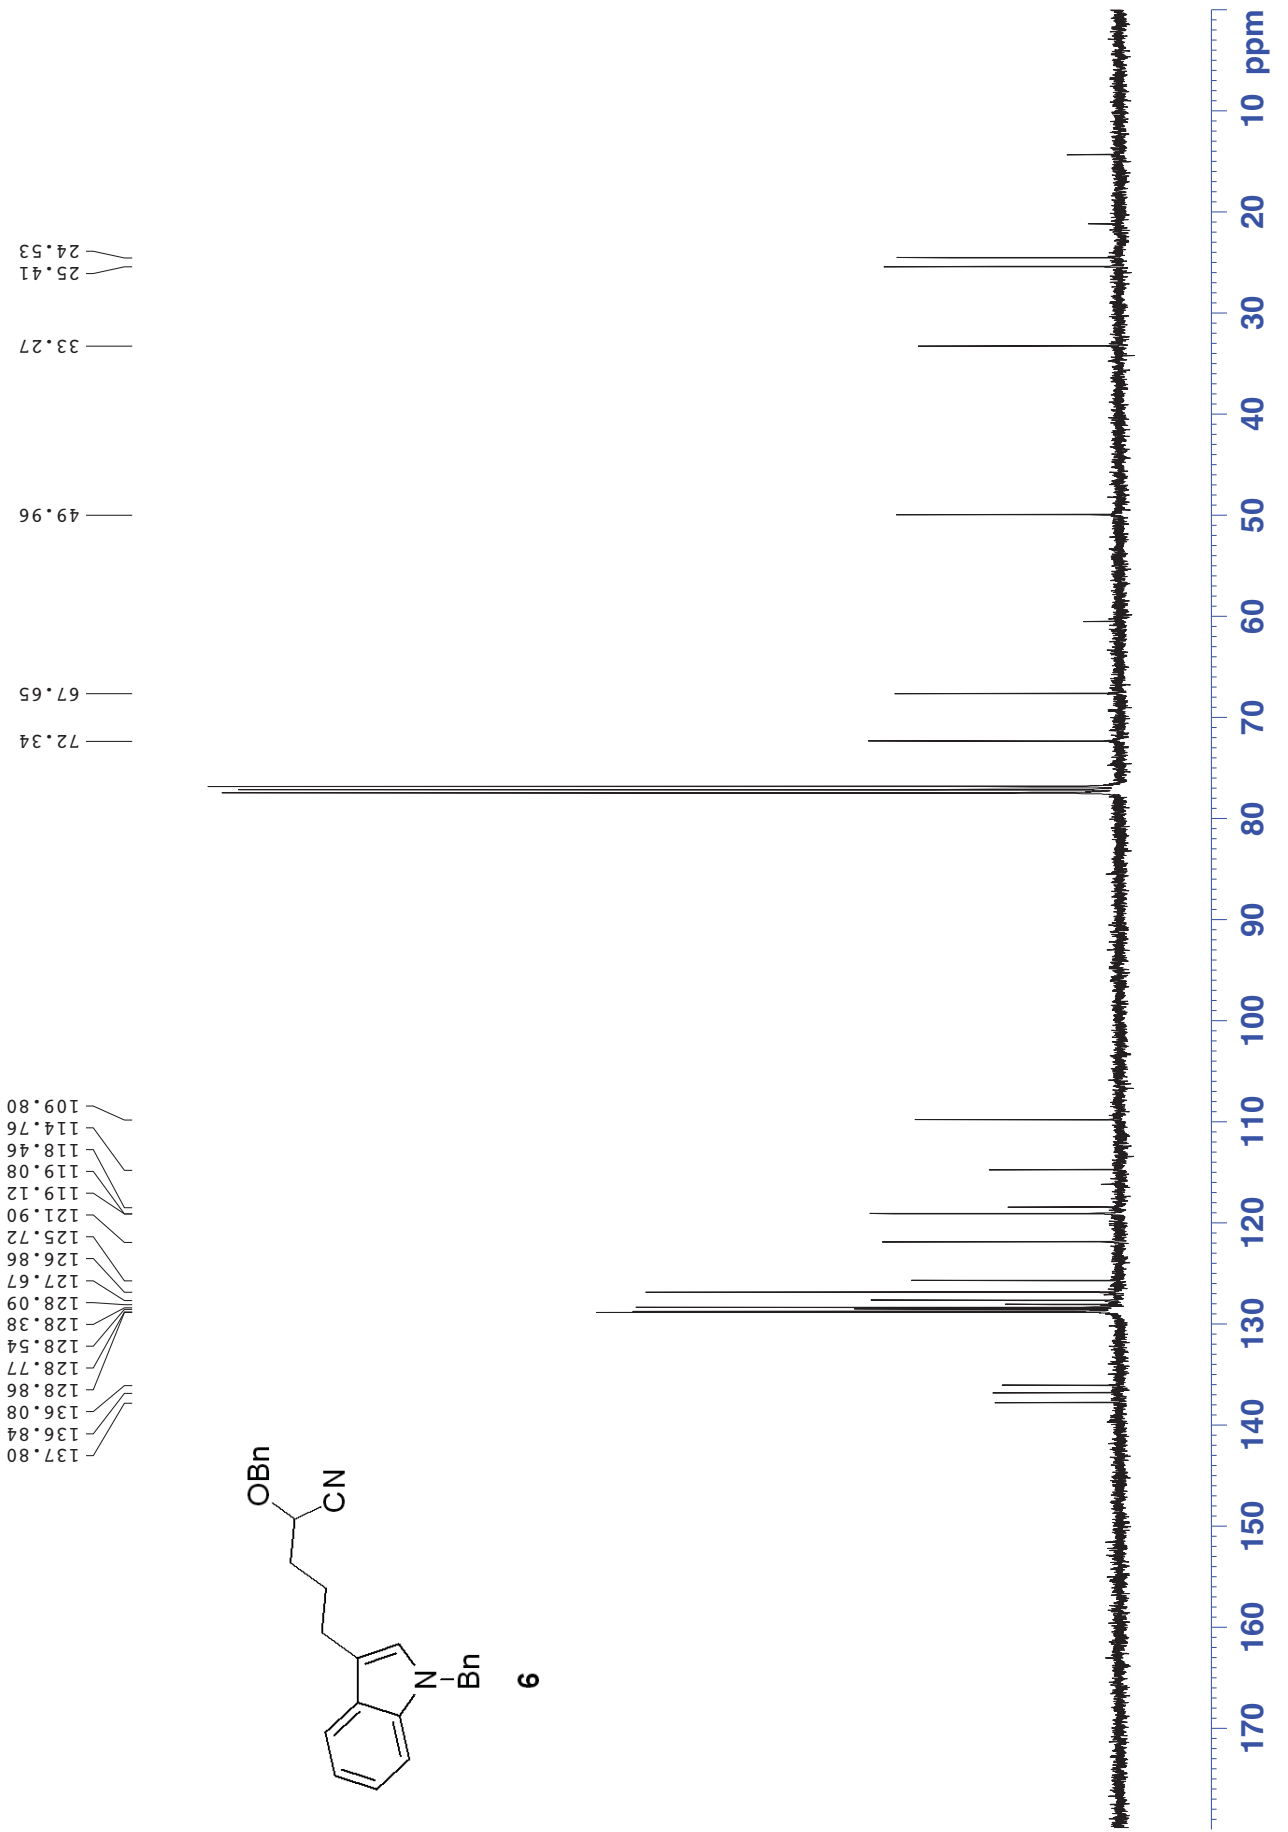

ch11-243 500

7.520  
7.505  
7.369  
7.358  
7.343  
7.329  
7.285  
7.241  
7.232  
7.216  
7.183  
7.169  
7.154  
7.138  
7.137  
7.123  
7.109  
7.087  
7.073  
5.379  
4.837  
4.814  
4.504  
4.481  
4.182  
4.171  
4.159  
2.848  
2.837  
1.947  
1.933  
1.919  
1.905

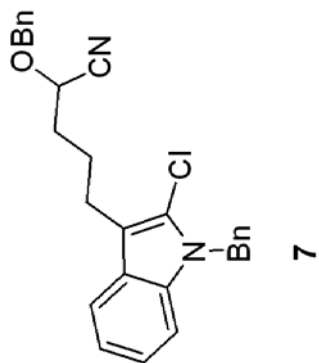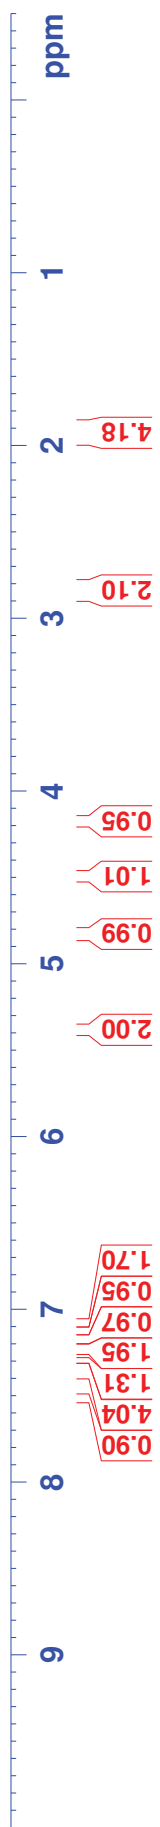

ch11-243 C13 300

137.25  
136.11  
135.62  
128.88  
128.78  
128.55  
128.40  
127.62  
126.85  
126.54  
123.59  
122.26  
120.16  
118.44  
118.42  
110.95  
109.86  
72.35  
67.60  
47.02  
33.02  
25.02  
23.54

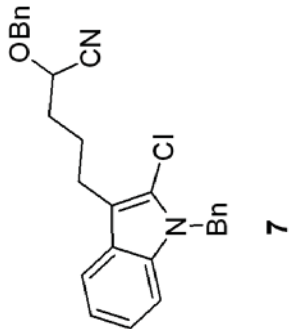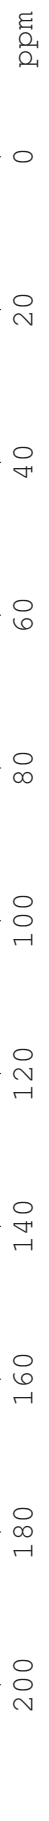



ch12-150 400b

7.408  
7.390  
7.383  
7.377  
7.371  
7.367  
7.361  
7.348  
7.343  
7.340  
7.332  
7.332  
7.316  
7.246  
7.242  
7.227  
7.207  
7.189  
7.171  
7.060  
7.051  
7.045  
7.042  
7.033  
7.027  
7.020  
7.016  
7.010  
7.005  
7.000  
5.222  
4.817  
4.788  
4.479  
4.450  
4.164  
4.150  
4.134  
2.750  
2.732  
2.715  
1.969  
1.945  
1.929  
1.921  
1.914  
1.906  
1.886  
1.870  
1.309  
1.290  
1.271  
1.252  
1.234  
1.087  
1.069

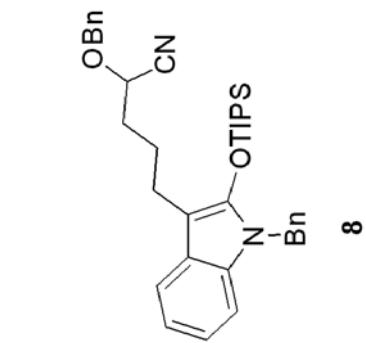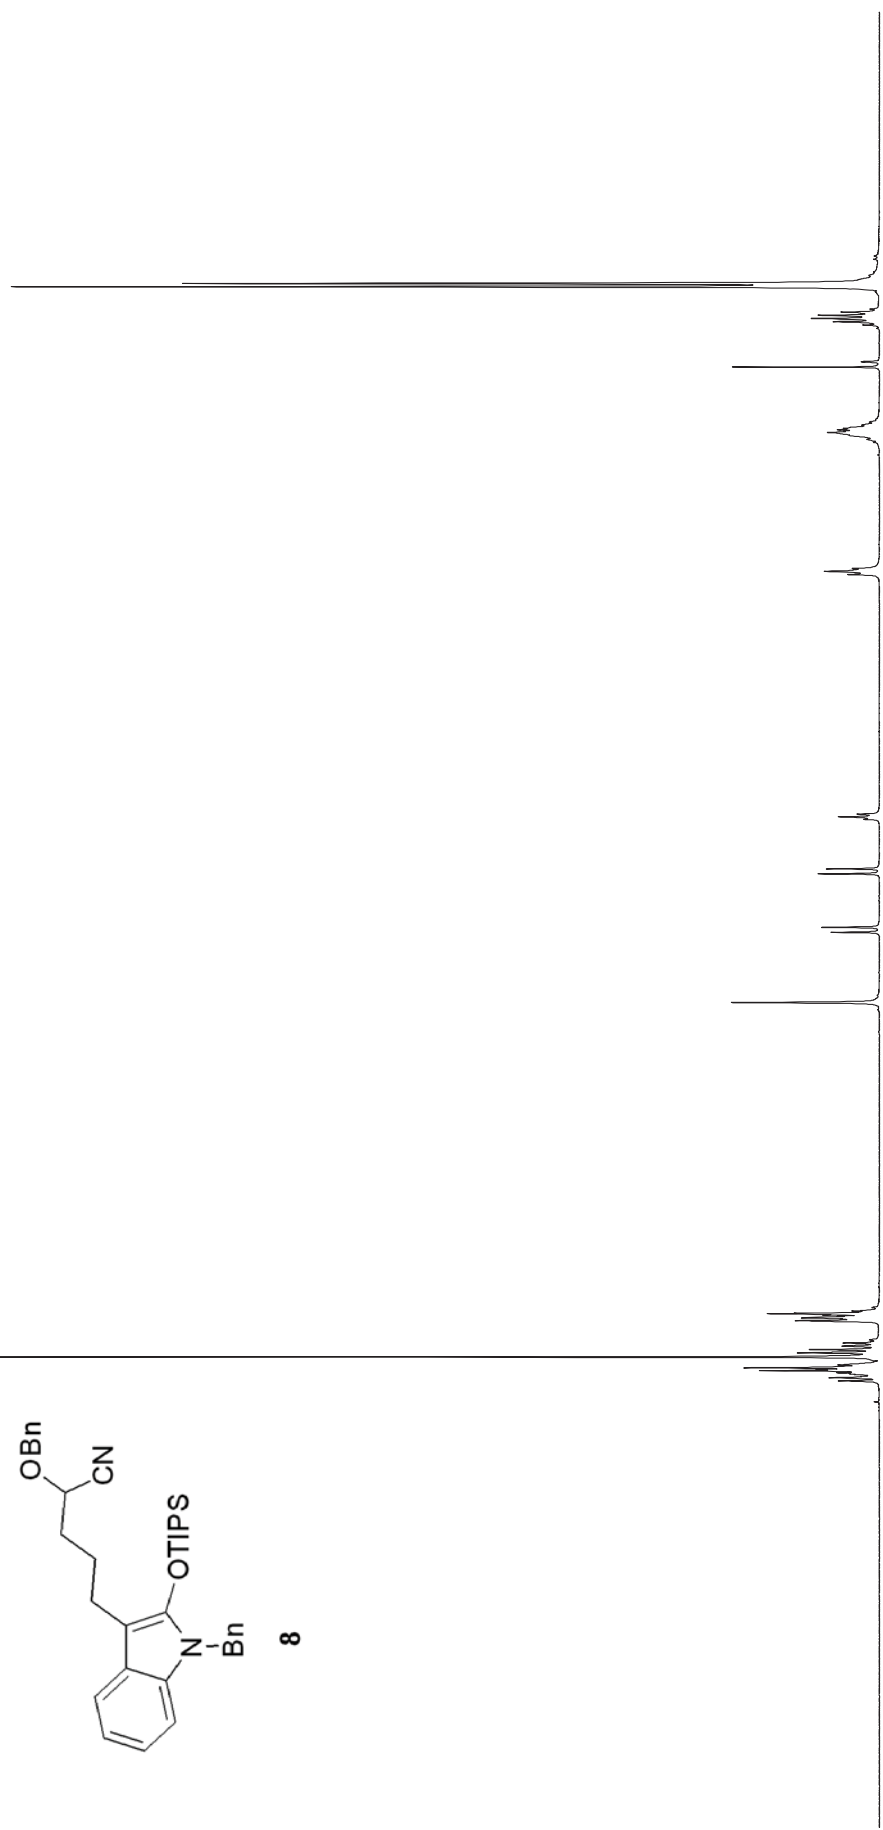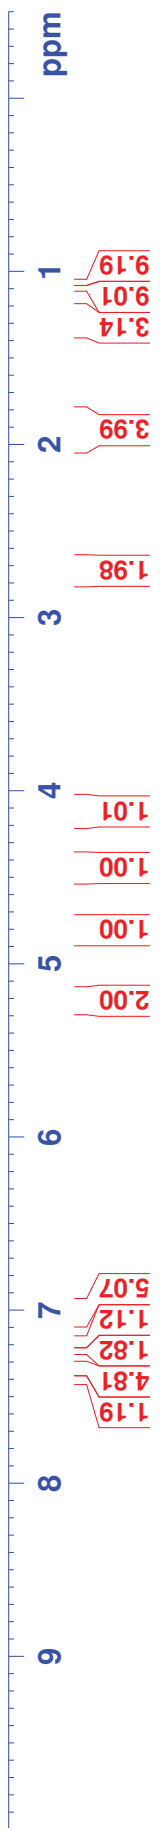

ch12-150 C13 400b

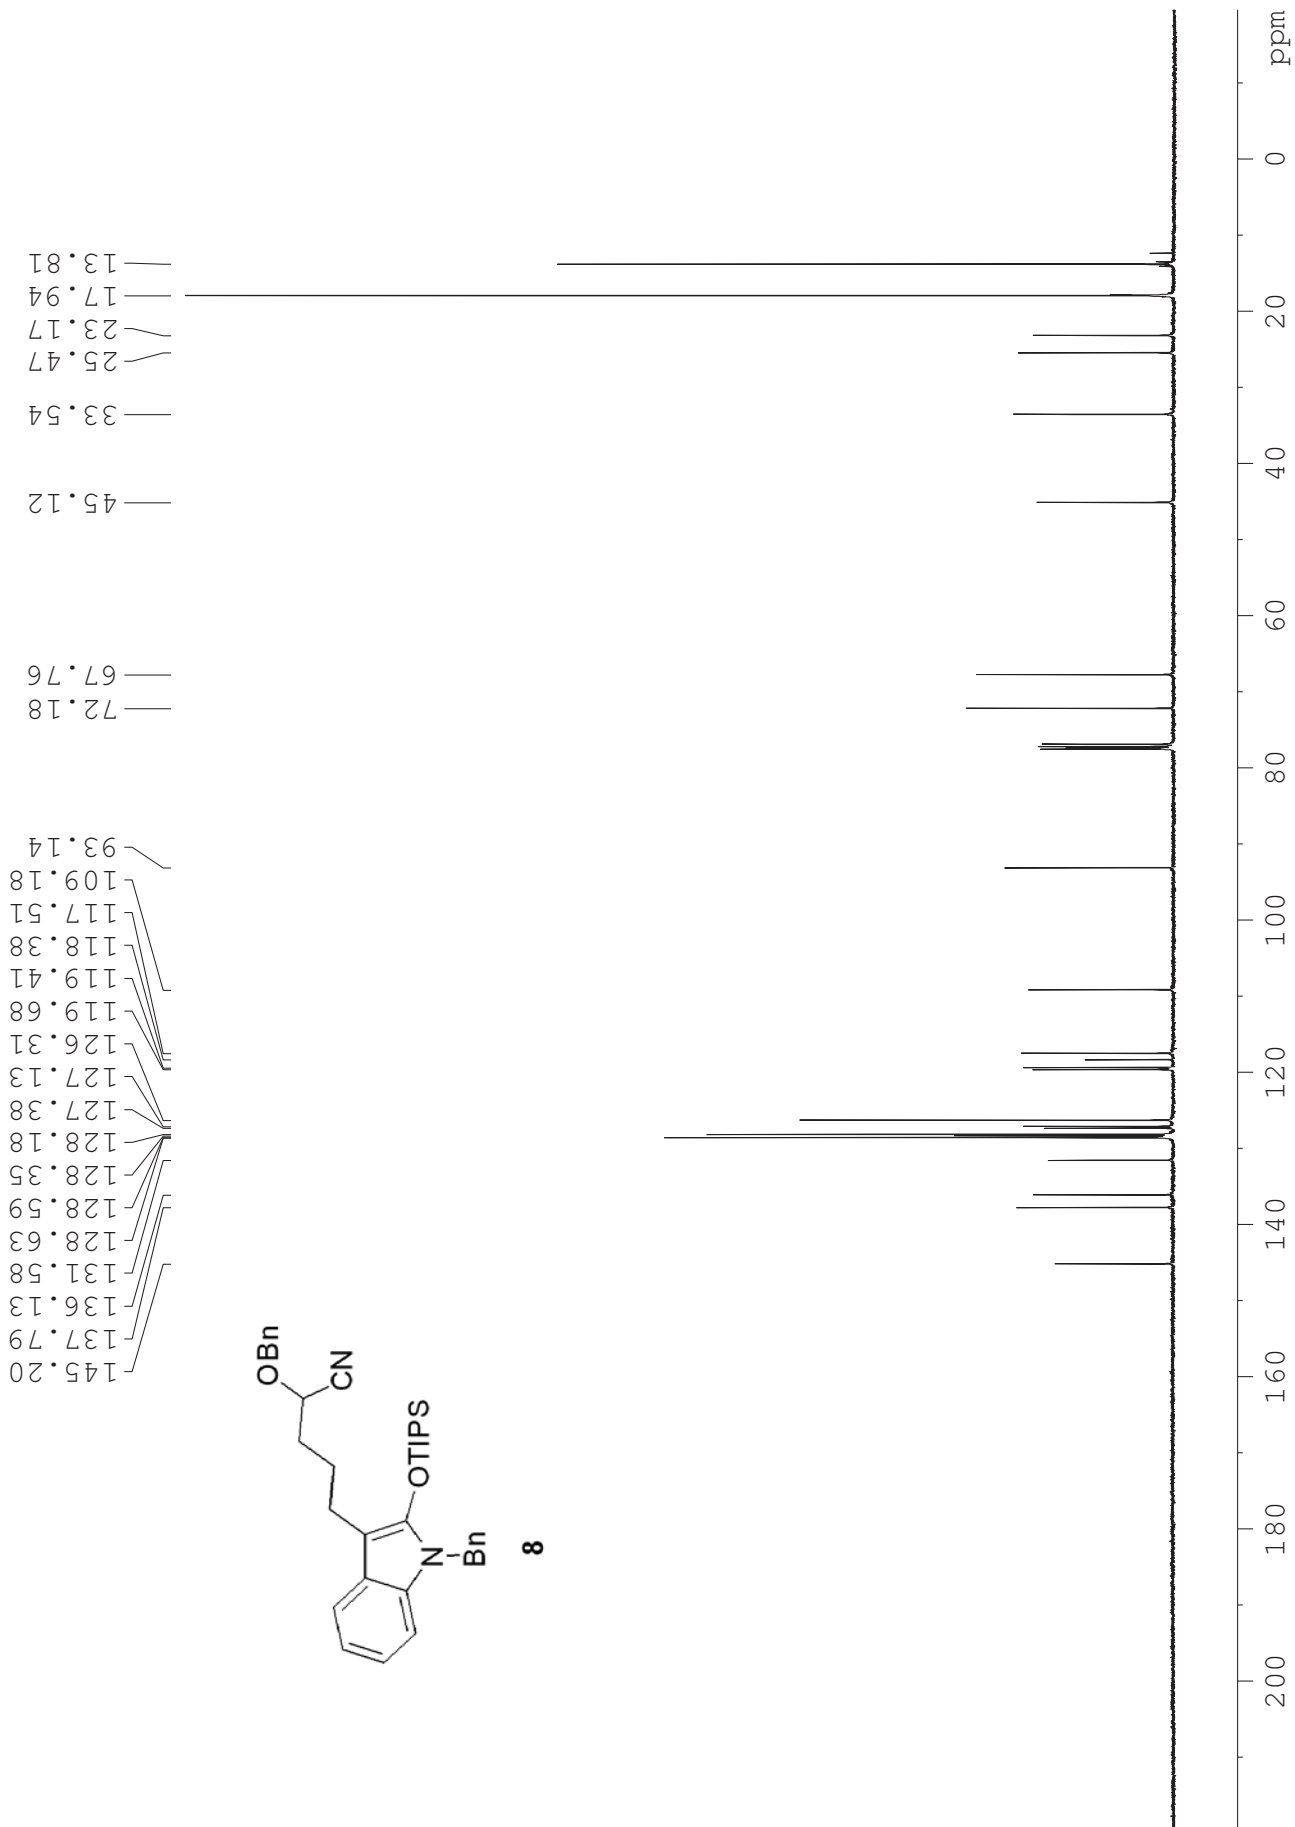

ch12-091-1 400a

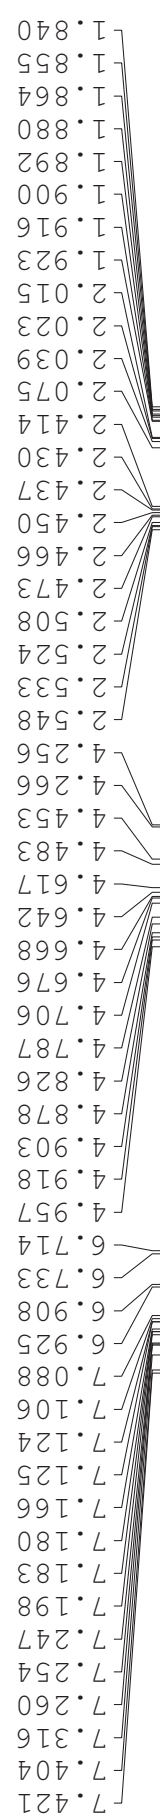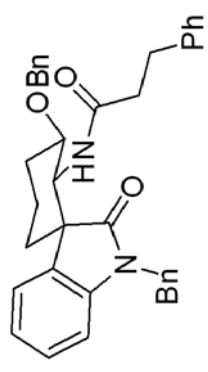

11

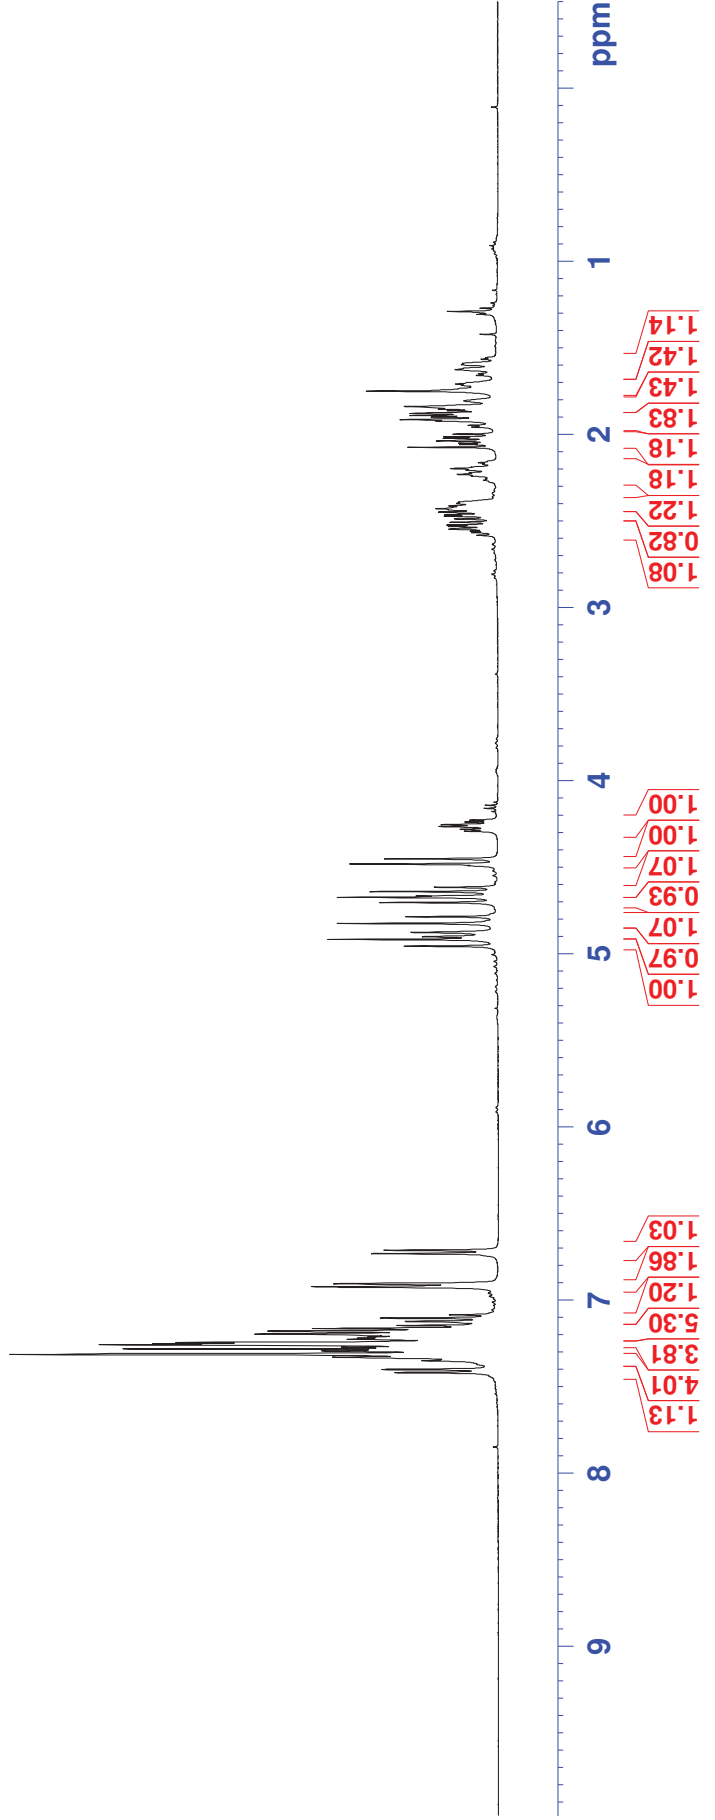

ch12-091-1 C13 400a

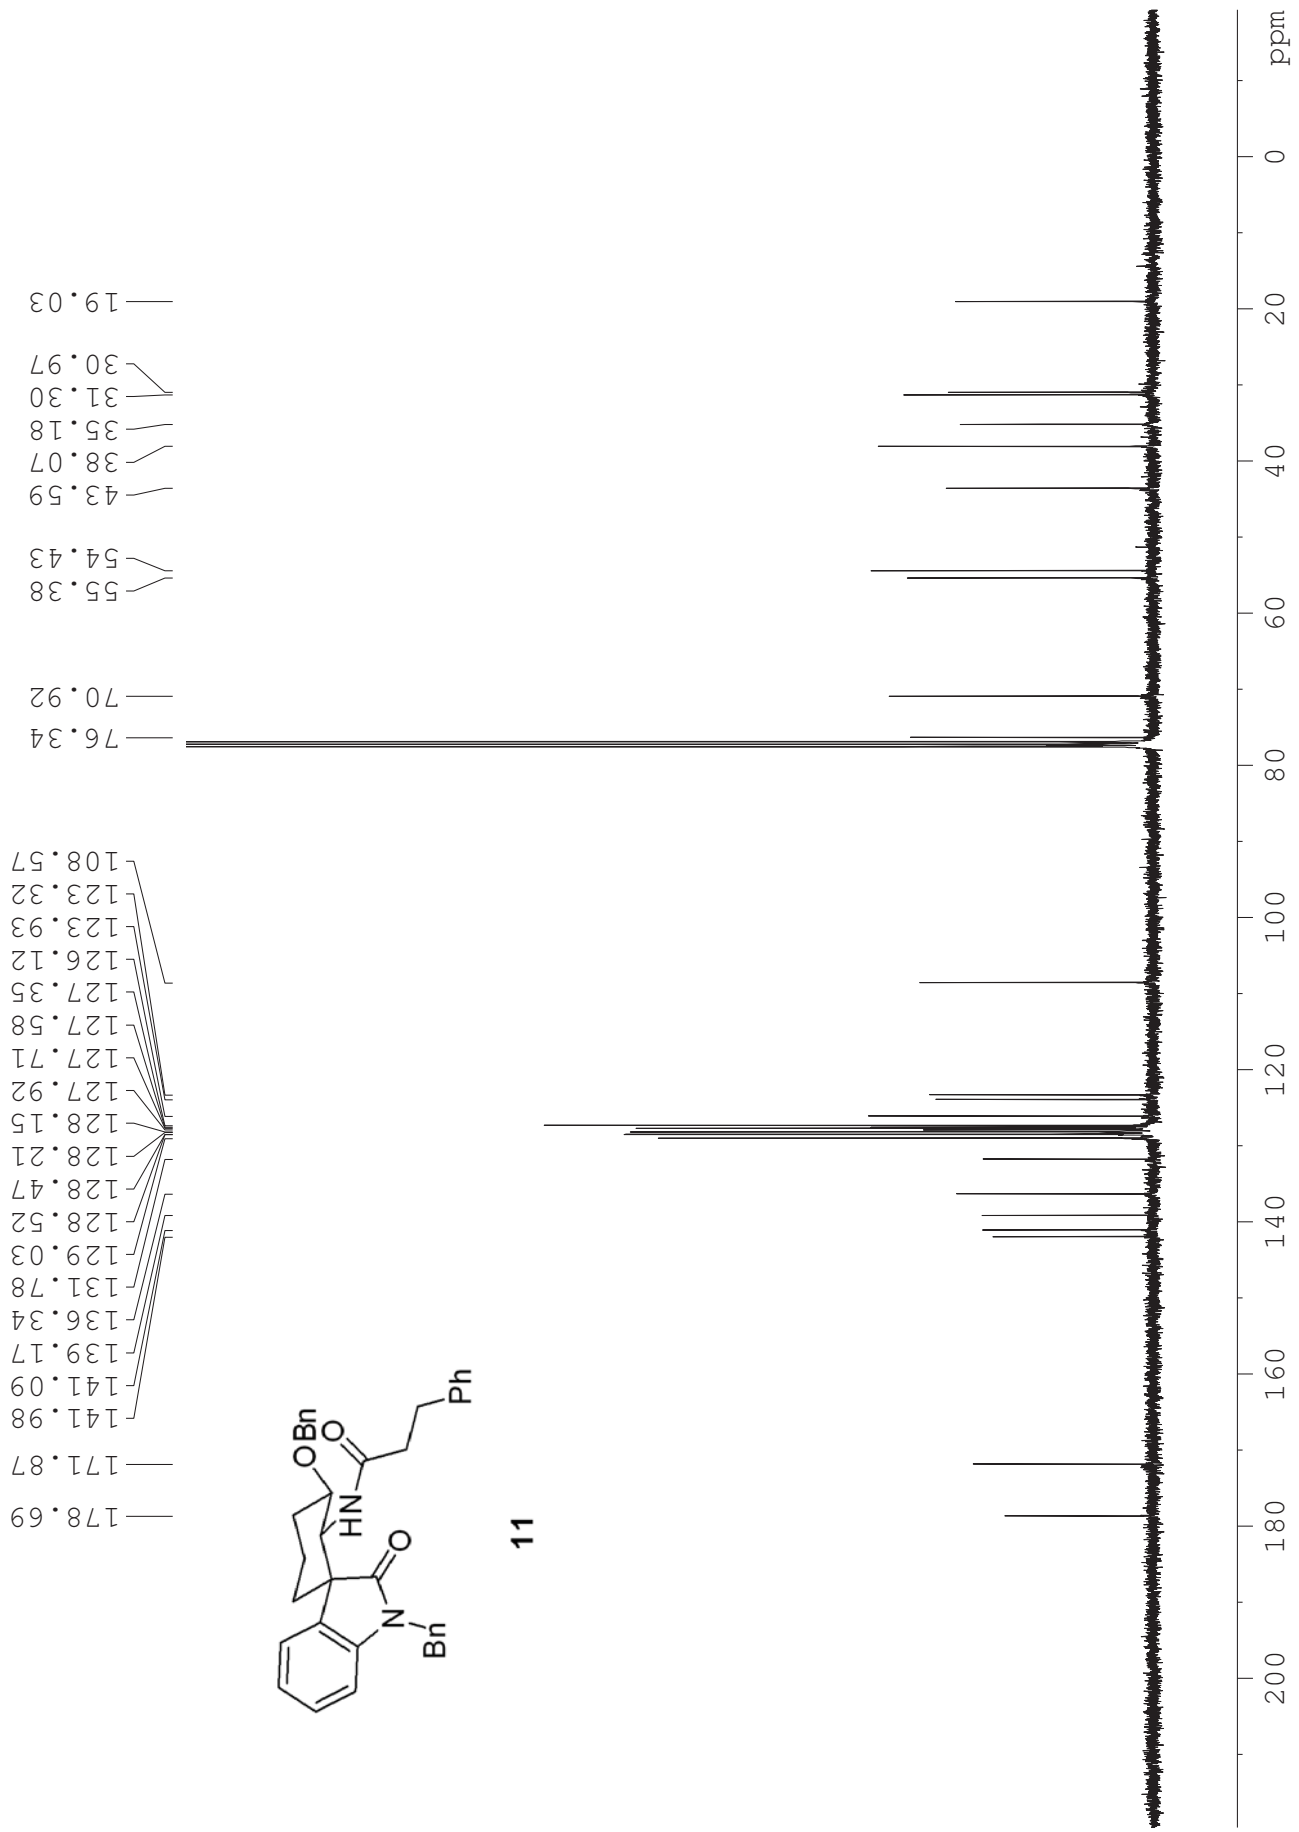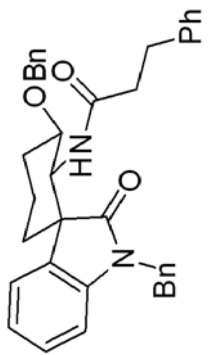

11

ch12-169 NOESY 400a

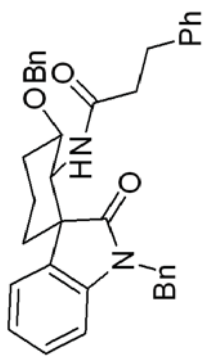

11

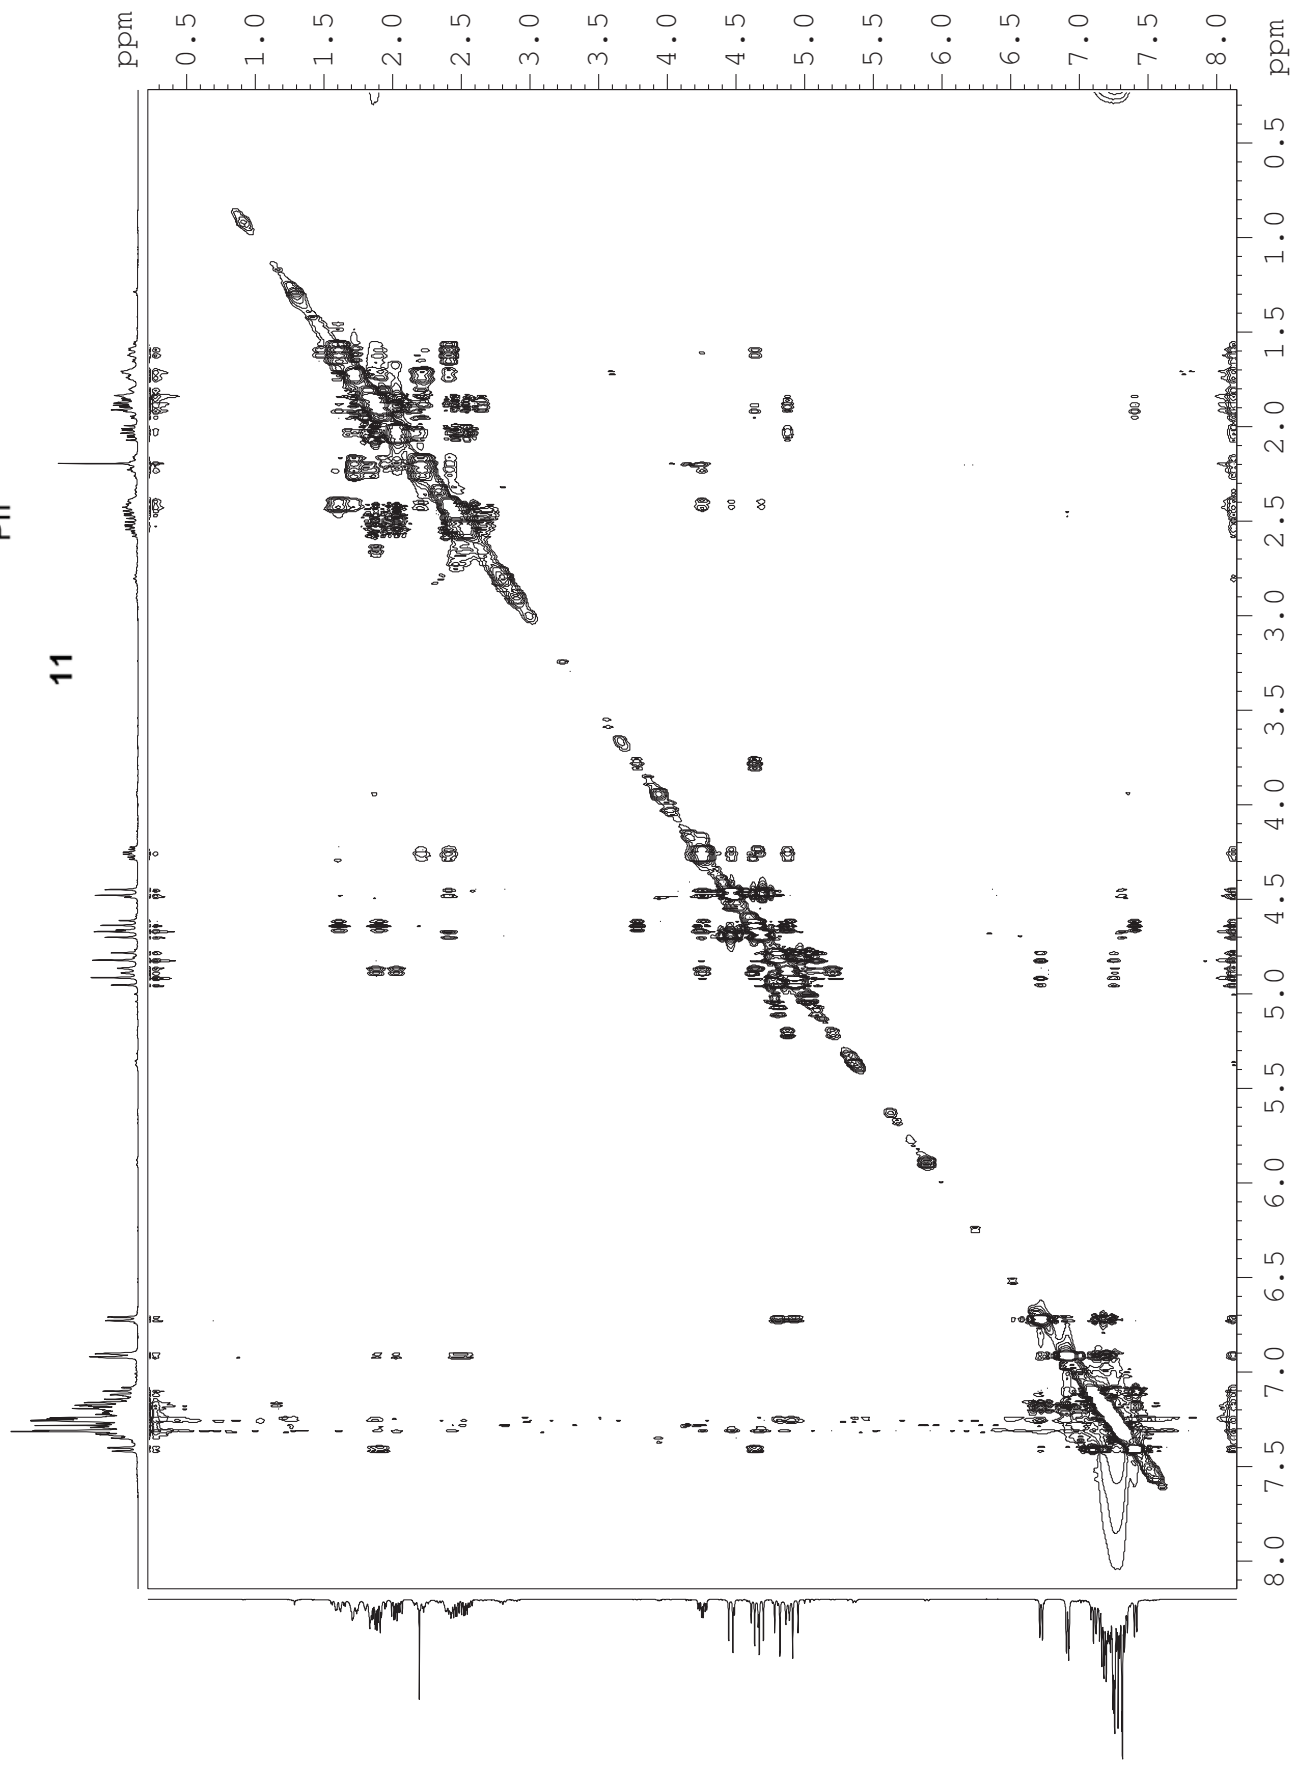

ch12-091-3 400

7.611  
7.593  
7.290  
7.288  
7.284  
7.276  
7.266  
7.262  
7.256  
7.245  
7.228  
7.218  
7.210  
7.207  
7.192  
7.144  
7.126  
7.082  
7.065  
7.063  
7.053  
7.049  
7.032  
6.896  
6.872  
6.853  
4.986  
4.947  
4.703  
4.664  
4.635  
4.606  
4.493  
4.467  
4.438  
3.850  
3.839  
2.573  
2.552  
2.531  
2.378  
2.353  
2.193  
2.175  
2.155  
2.134  
2.059  
2.038  
2.017  
2.001  
1.905  
1.877  
1.772  
1.442  
1.418

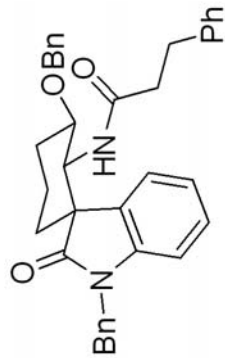

12

030

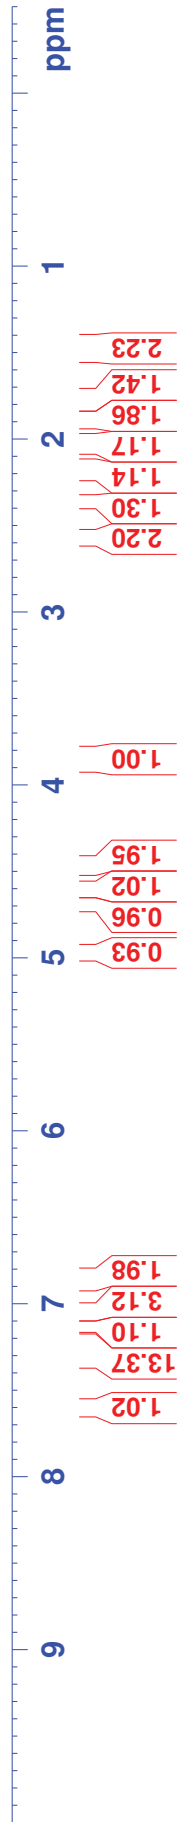

ch12-091-3 C13 300

177.17  
171.23  
142.91  
141.44  
139.28  
136.55  
129.96  
128.41  
128.23  
127.96  
127.87  
127.22  
127.14  
127.07  
125.88  
125.73  
121.86  
108.88  
77.36  
70.62  
54.81  
53.96  
42.57  
36.89  
33.74  
31.09  
30.90  
19.67

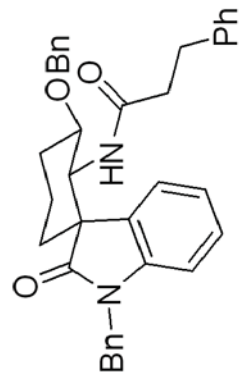

12

131

ppm

0

20

40

60

80

100

120

140

160

180

200

220

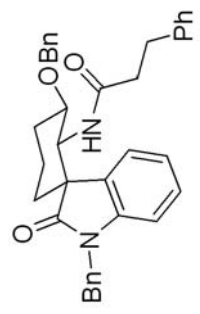

12

ch12-151-3 NOESY 400a

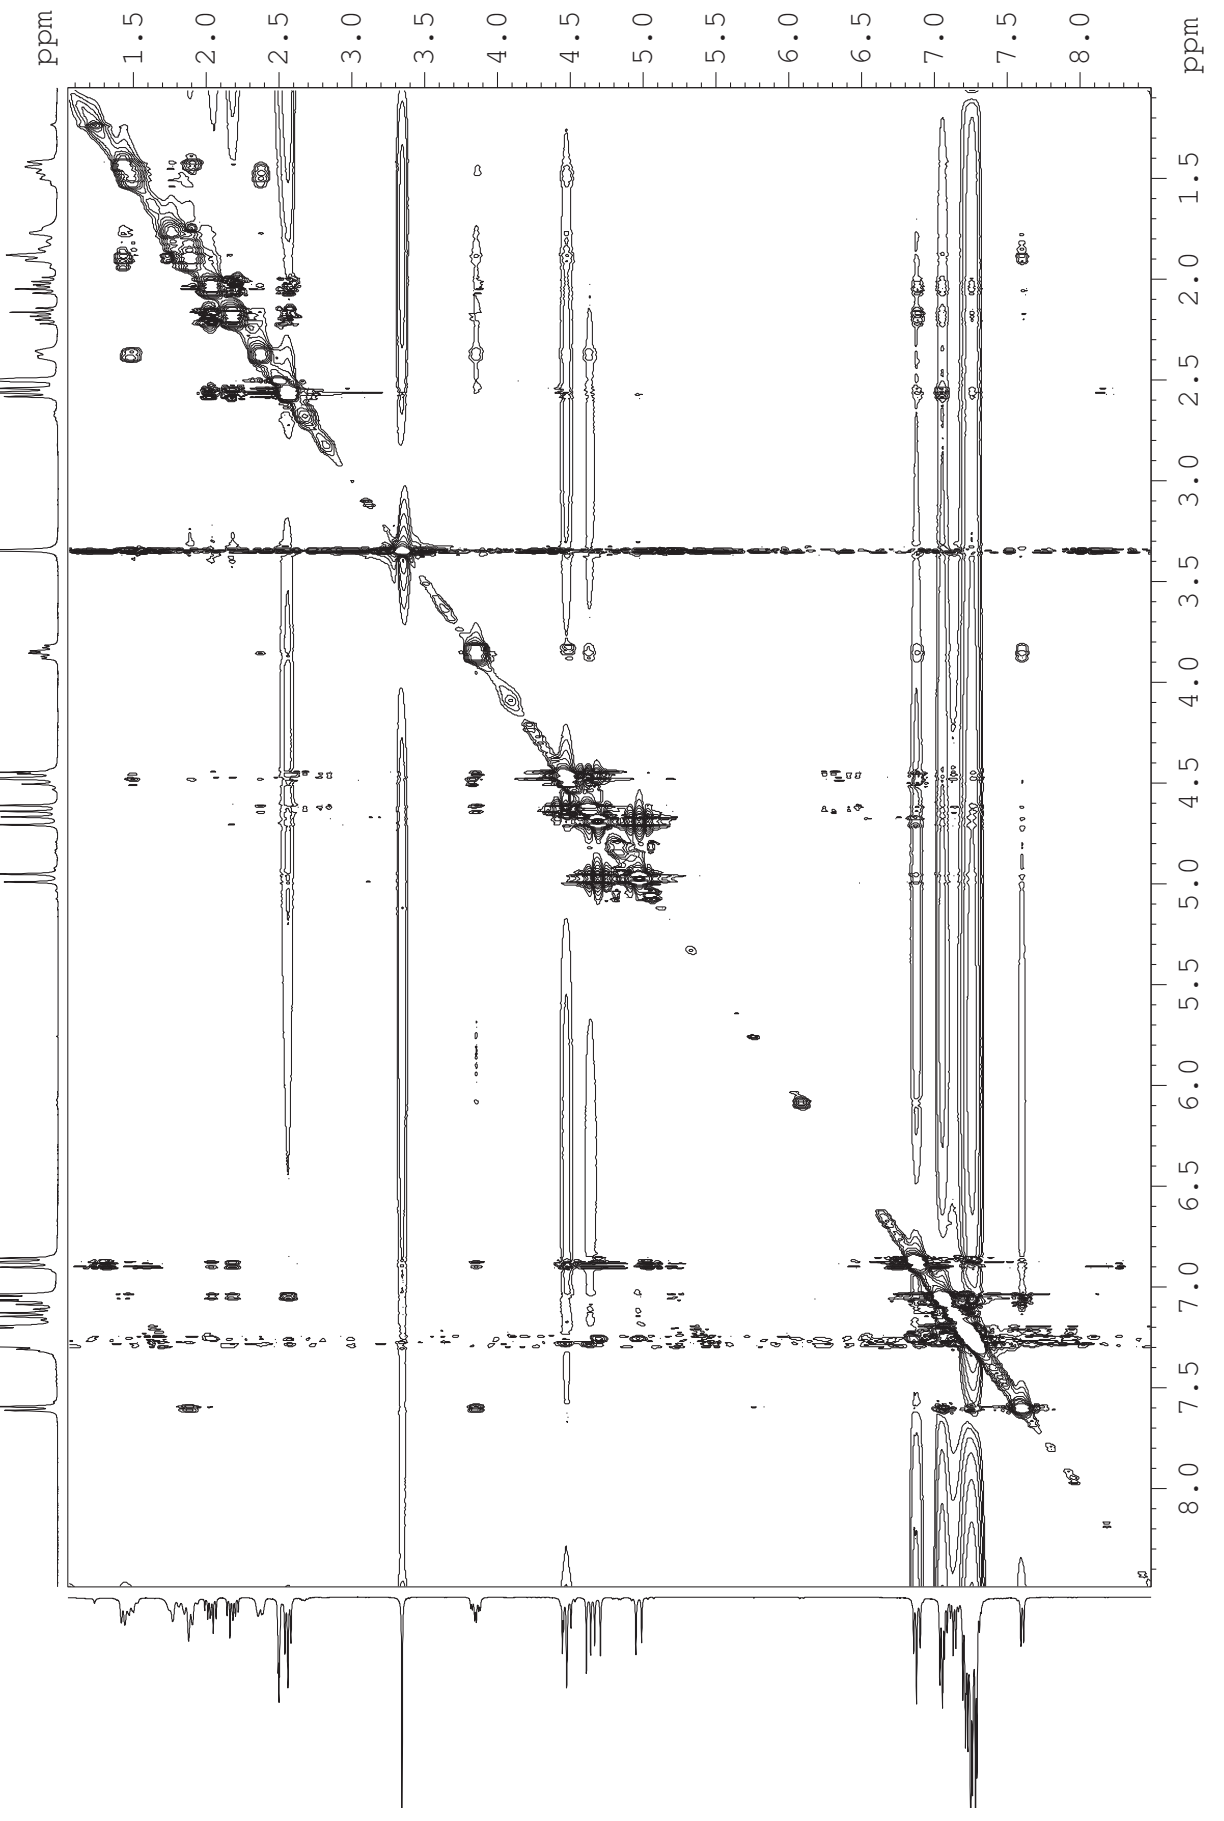



ch12-155-3 400a

7.907  
7.905  
7.905  
7.888  
7.328  
7.324  
7.314  
7.310  
7.306  
7.301  
7.297  
7.284  
7.265  
7.261  
7.258  
7.250  
7.242  
7.238  
7.229  
7.226  
7.223  
7.209  
7.206  
7.193  
7.190  
7.182  
7.163  
7.160  
7.152  
7.143  
7.140  
7.134  
7.042  
7.039  
7.021  
6.877  
6.874  
6.725  
6.705  
5.066  
5.027  
4.768  
4.758  
4.743  
4.696  
4.657  
4.629  
4.217  
4.189  
3.871  
3.864  
2.162  
2.029  
2.026  
2.023  
1.640

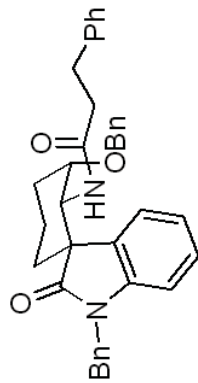

28

S33

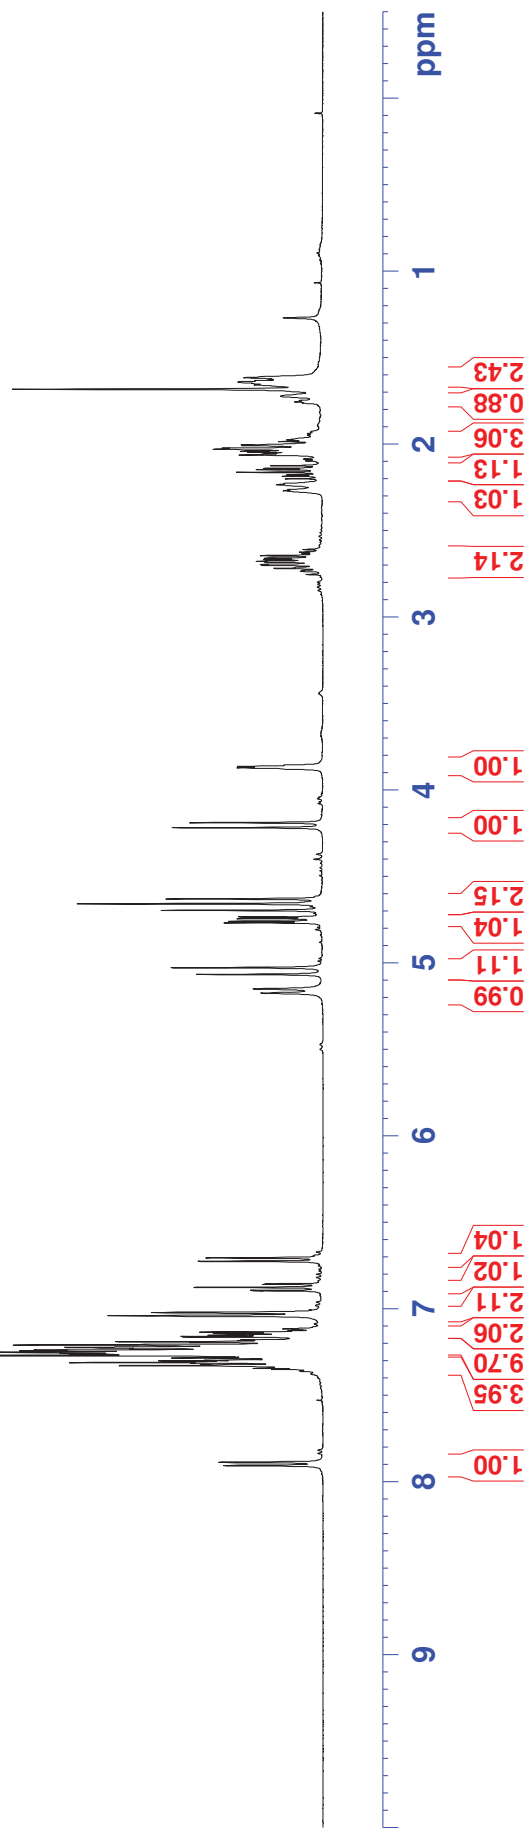

ch12-155-3 C13 400a

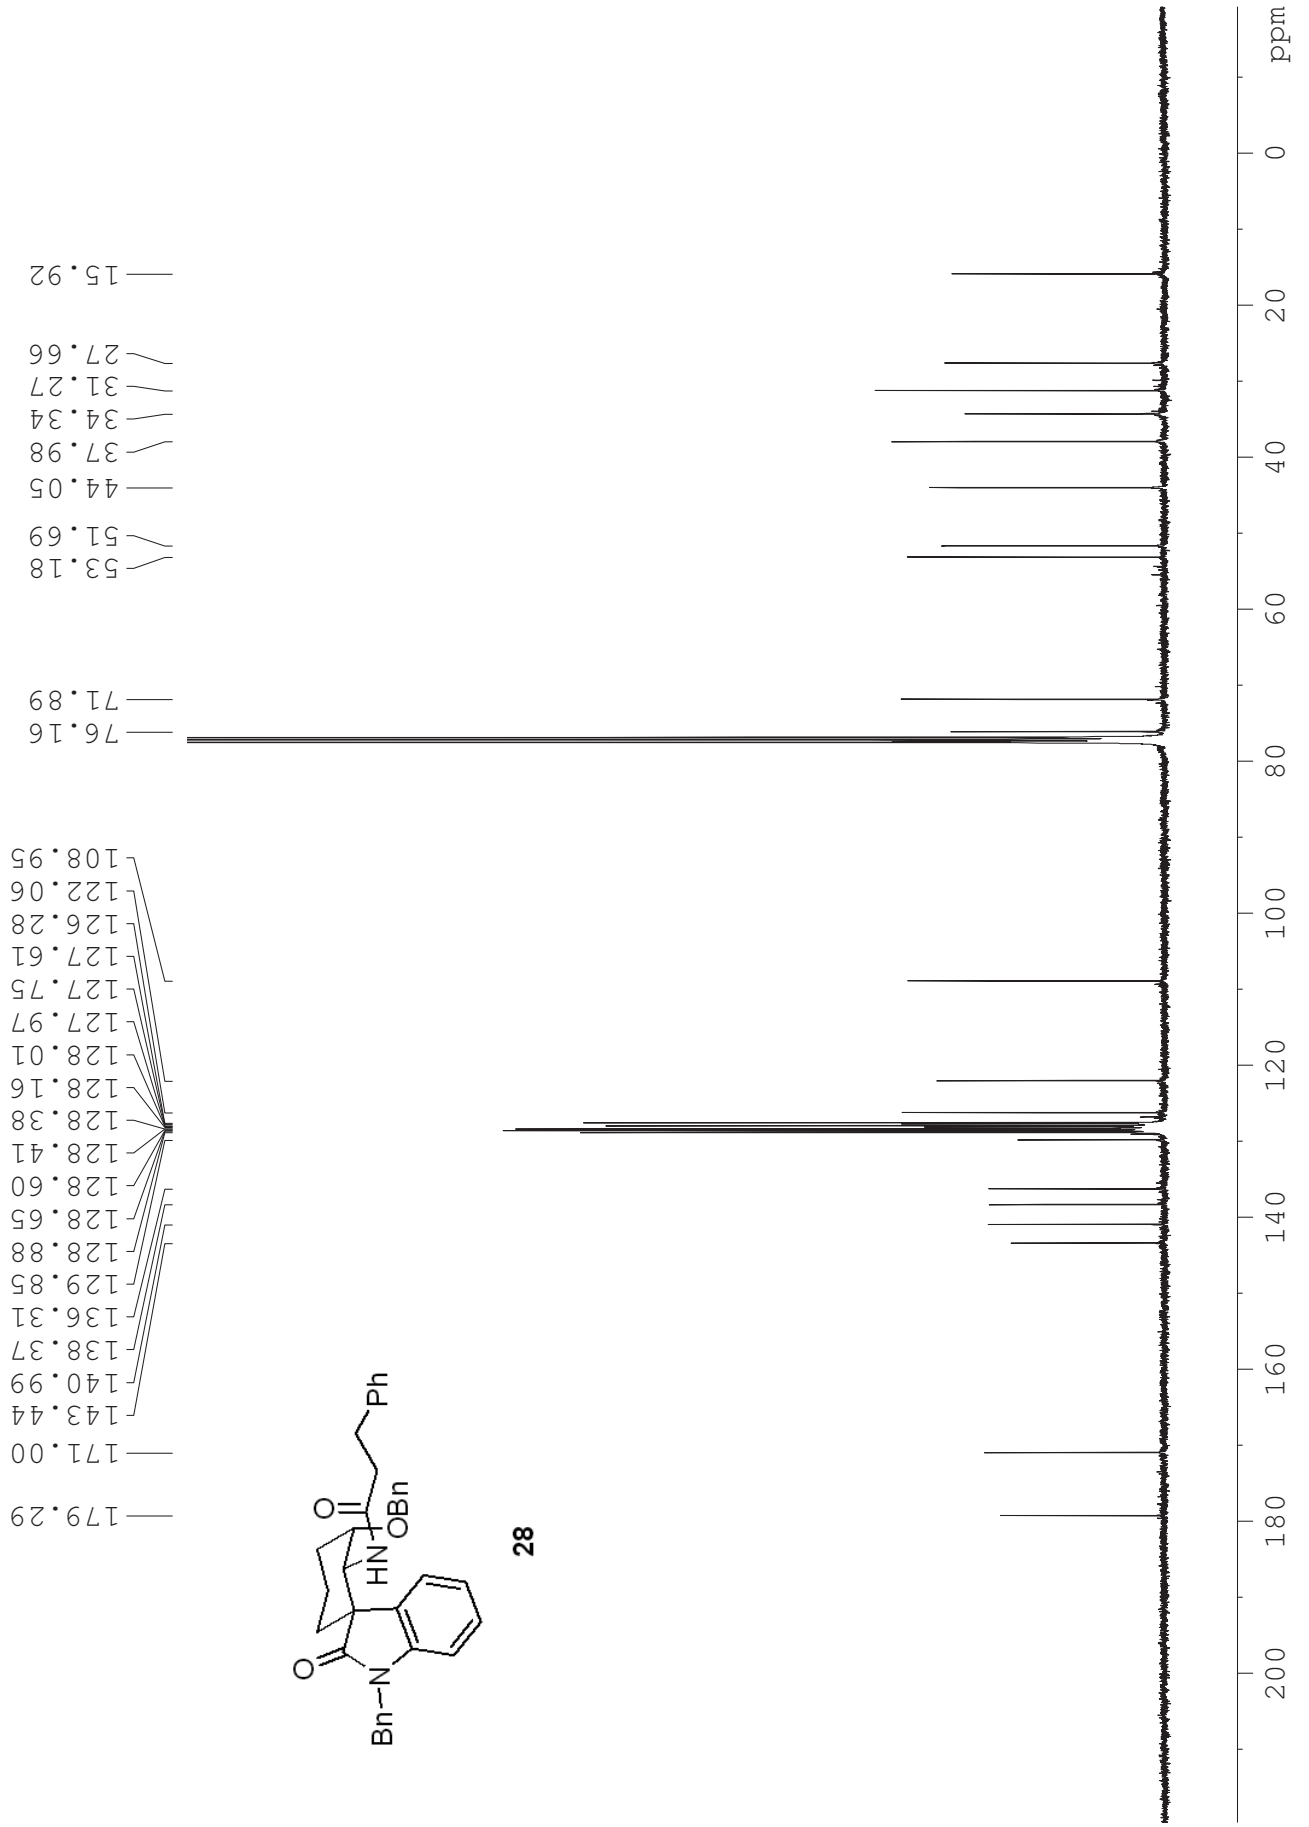

28

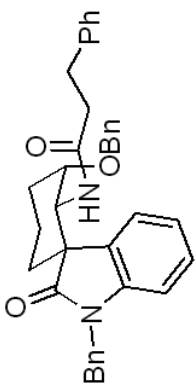

28

ch12-155-3 NOESY 400a

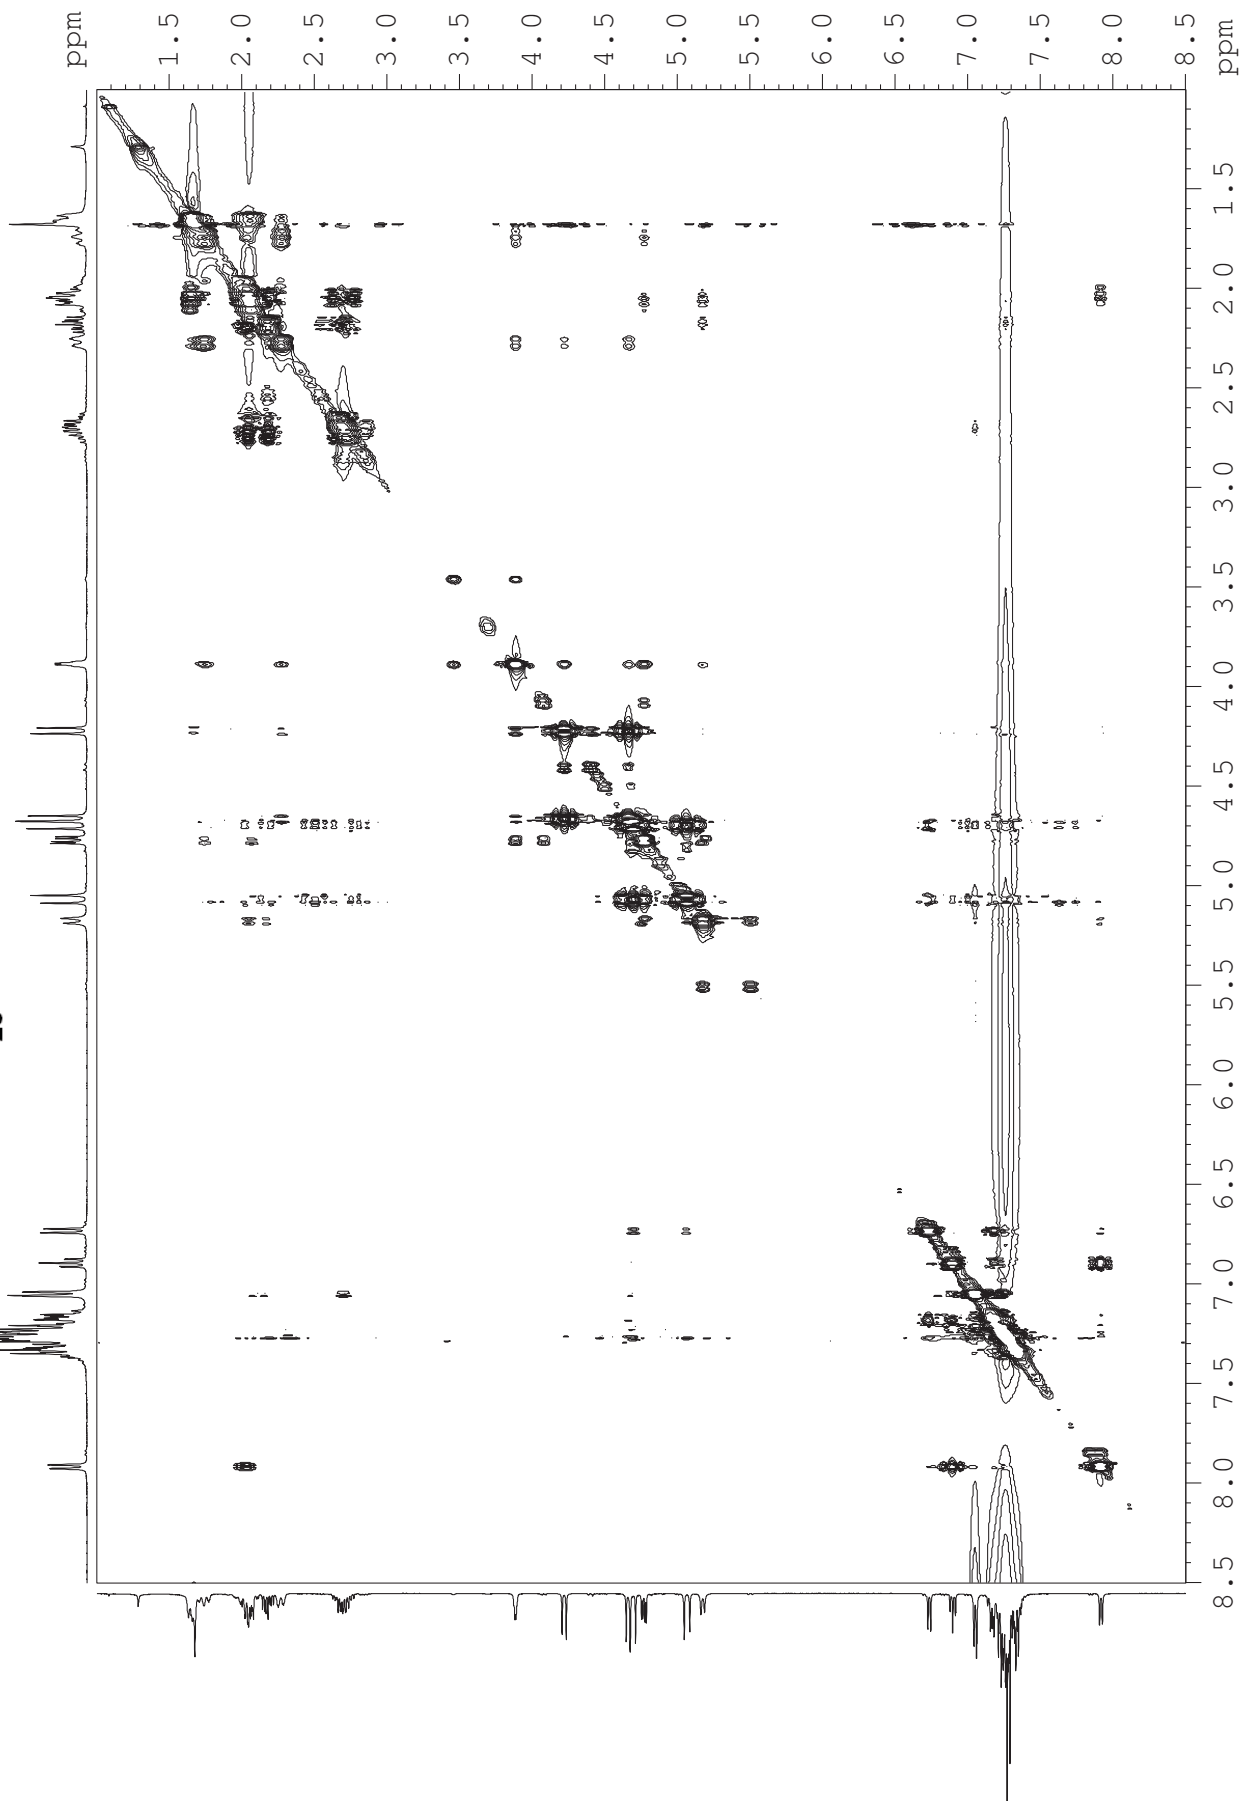

ch11-236 500

7.363  
7.348  
7.304  
7.269  
7.140  
7.125  
7.109  
7.064  
7.049  
7.034  
6.707  
6.692  
5.000  
4.969  
4.839  
4.820  
4.796  
4.765  
4.712  
4.688  
4.623  
4.603  
4.583  
4.502  
4.478  
4.306  
4.297  
4.285  
4.277  
4.264  
4.256  
2.413  
2.390  
2.243  
2.216  
2.189  
1.929  
1.908  
1.902  
1.881  
1.875  
1.825  
1.798  
1.737  
1.725  
1.711  
1.699  
1.632  
1.611  
1.585  
1.565  
0.786  
0.773  
0.425  
0.412

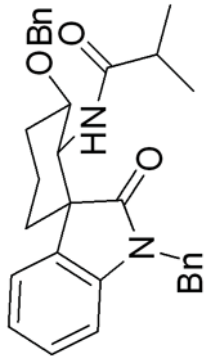

13

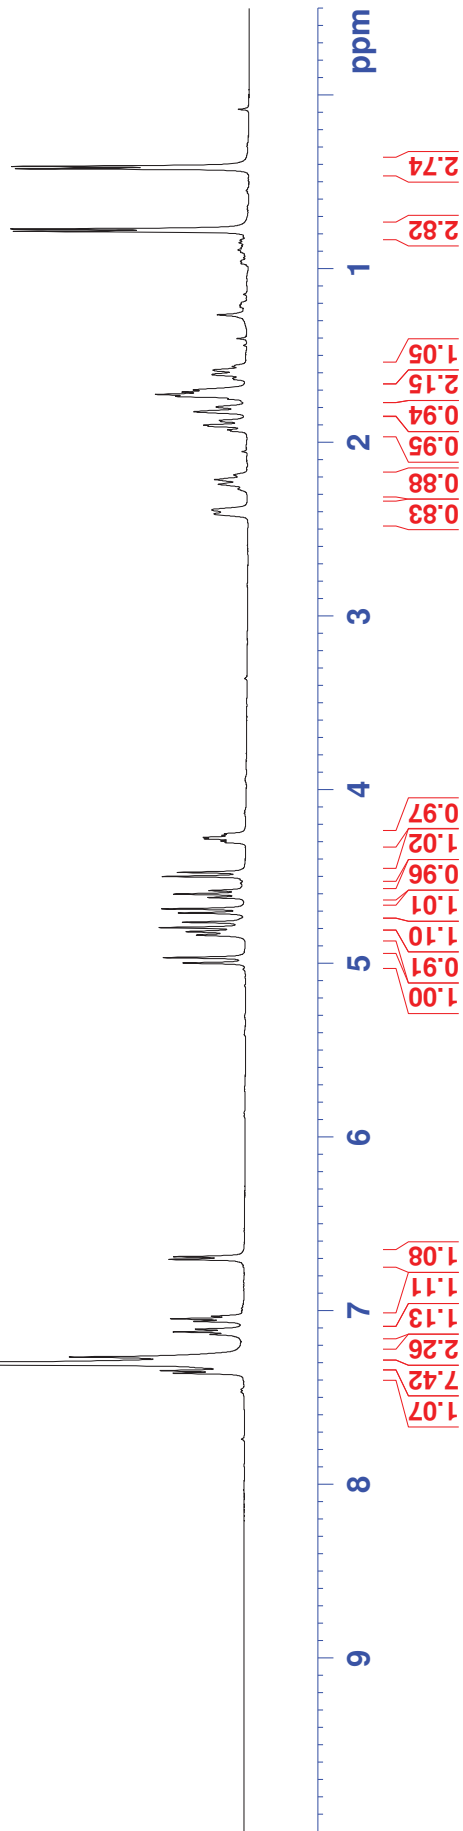

ch11-236-1 C13 301

178.750  
176.558

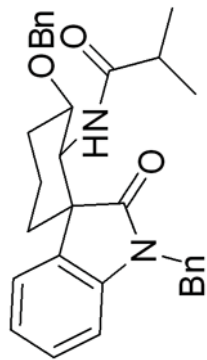

13

141.978  
139.158  
136.431  
131.641  
129.025  
128.406  
127.967  
127.707  
127.580  
127.528  
124.037  
123.272  
108.352

76.160  
70.951  
54.971  
54.563  
43.649  
35.855  
34.917  
31.068  
19.630  
19.062  
18.936

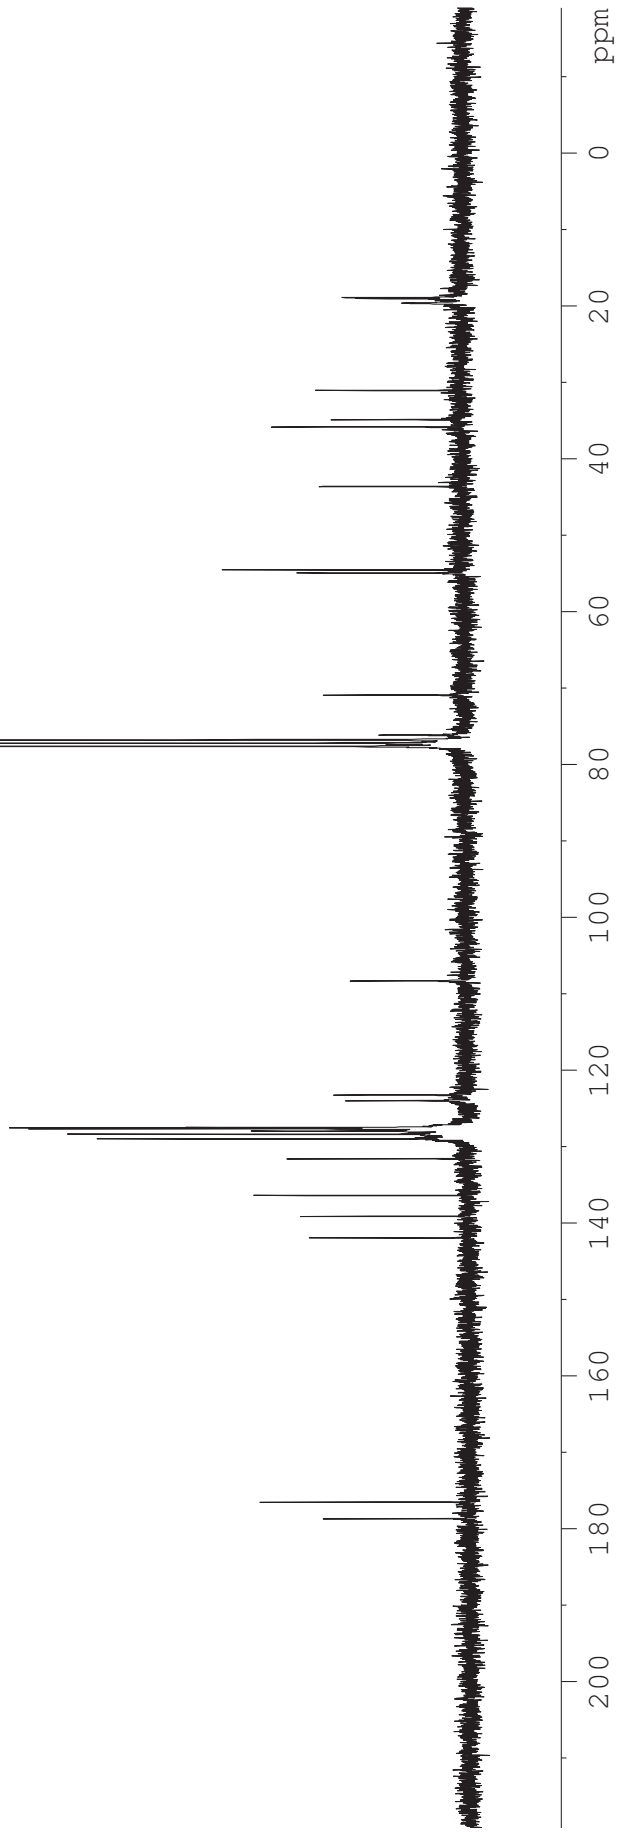

7.601  
7.576  
7.267  
7.250  
7.089  
7.065  
7.040  
6.849  
6.824  
6.712  
6.680  
4.890  
4.837  
4.805  
4.753  
4.637  
4.599  
4.491  
4.452  
4.429  
4.395  
4.362  
3.904  
3.891  
3.869  
3.854  
3.833  
3.817  
2.390  
2.343  
2.167  
2.145  
2.122  
2.099  
2.077  
1.903  
1.868  
1.830  
1.762  
1.472  
1.440  
1.407  
0.753  
0.731  
0.710  
0.687

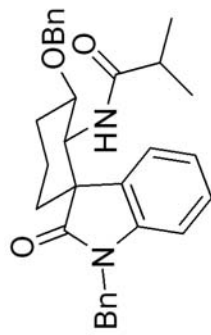

25

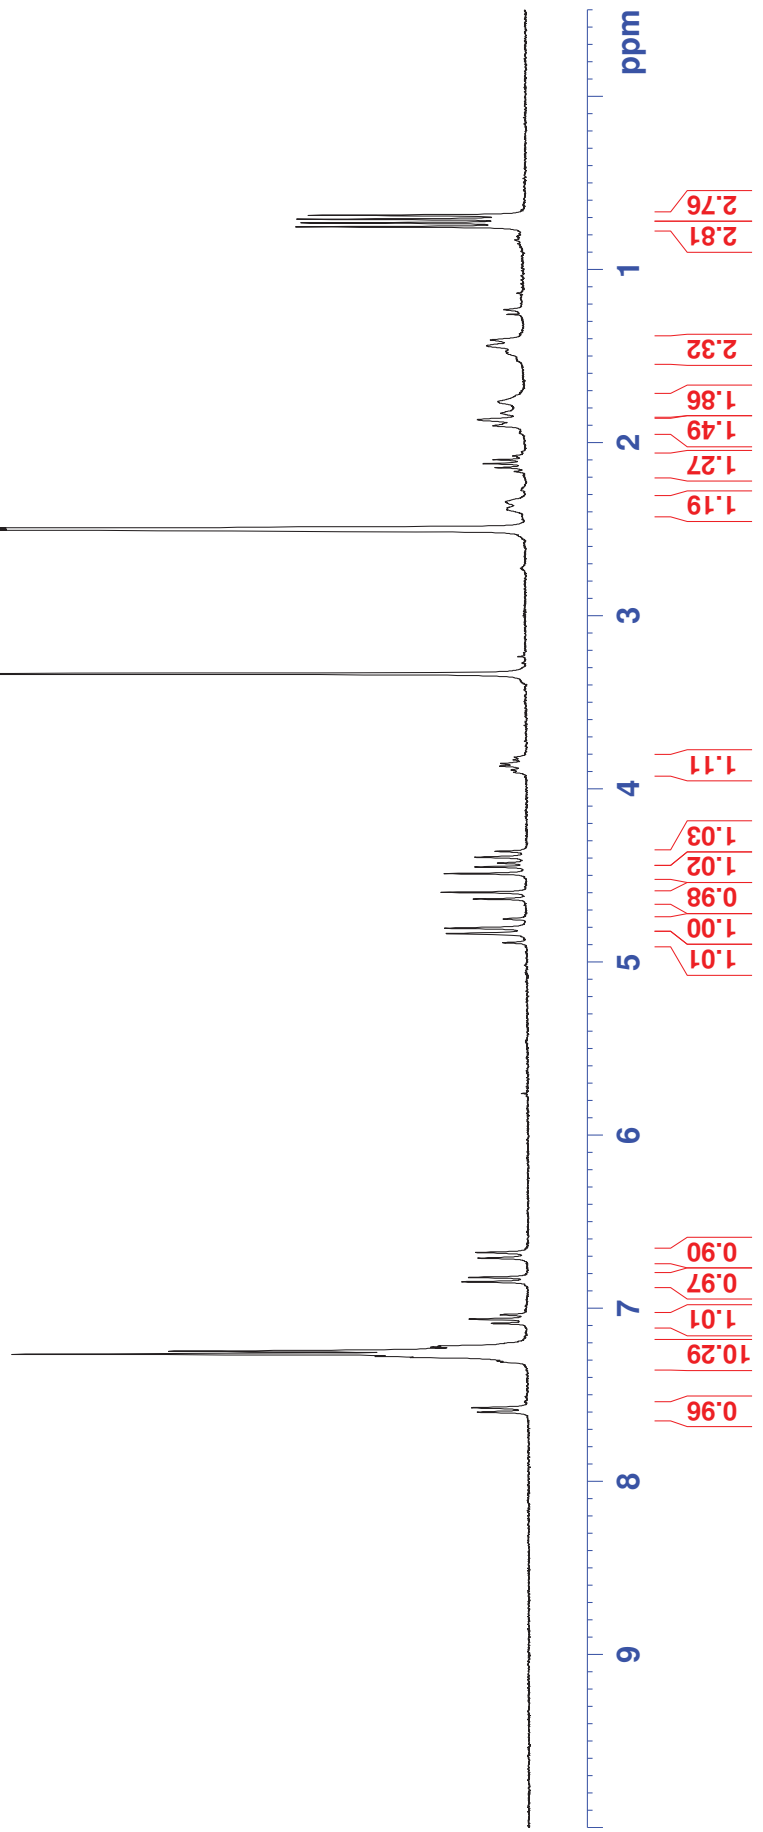

ch11-236-2 C13 300

177.19  
175.60

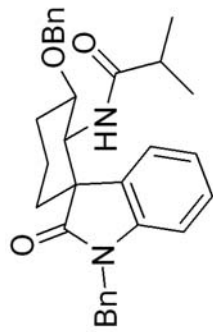

25

142.96  
139.20  
136.40  
129.97  
128.45  
127.91  
127.87  
127.19  
127.02  
126.97  
125.86  
121.77  
108.76

77.13  
70.46  
54.37  
54.09

42.65  
33.80  
33.53  
30.99  
19.77  
19.64  
18.93

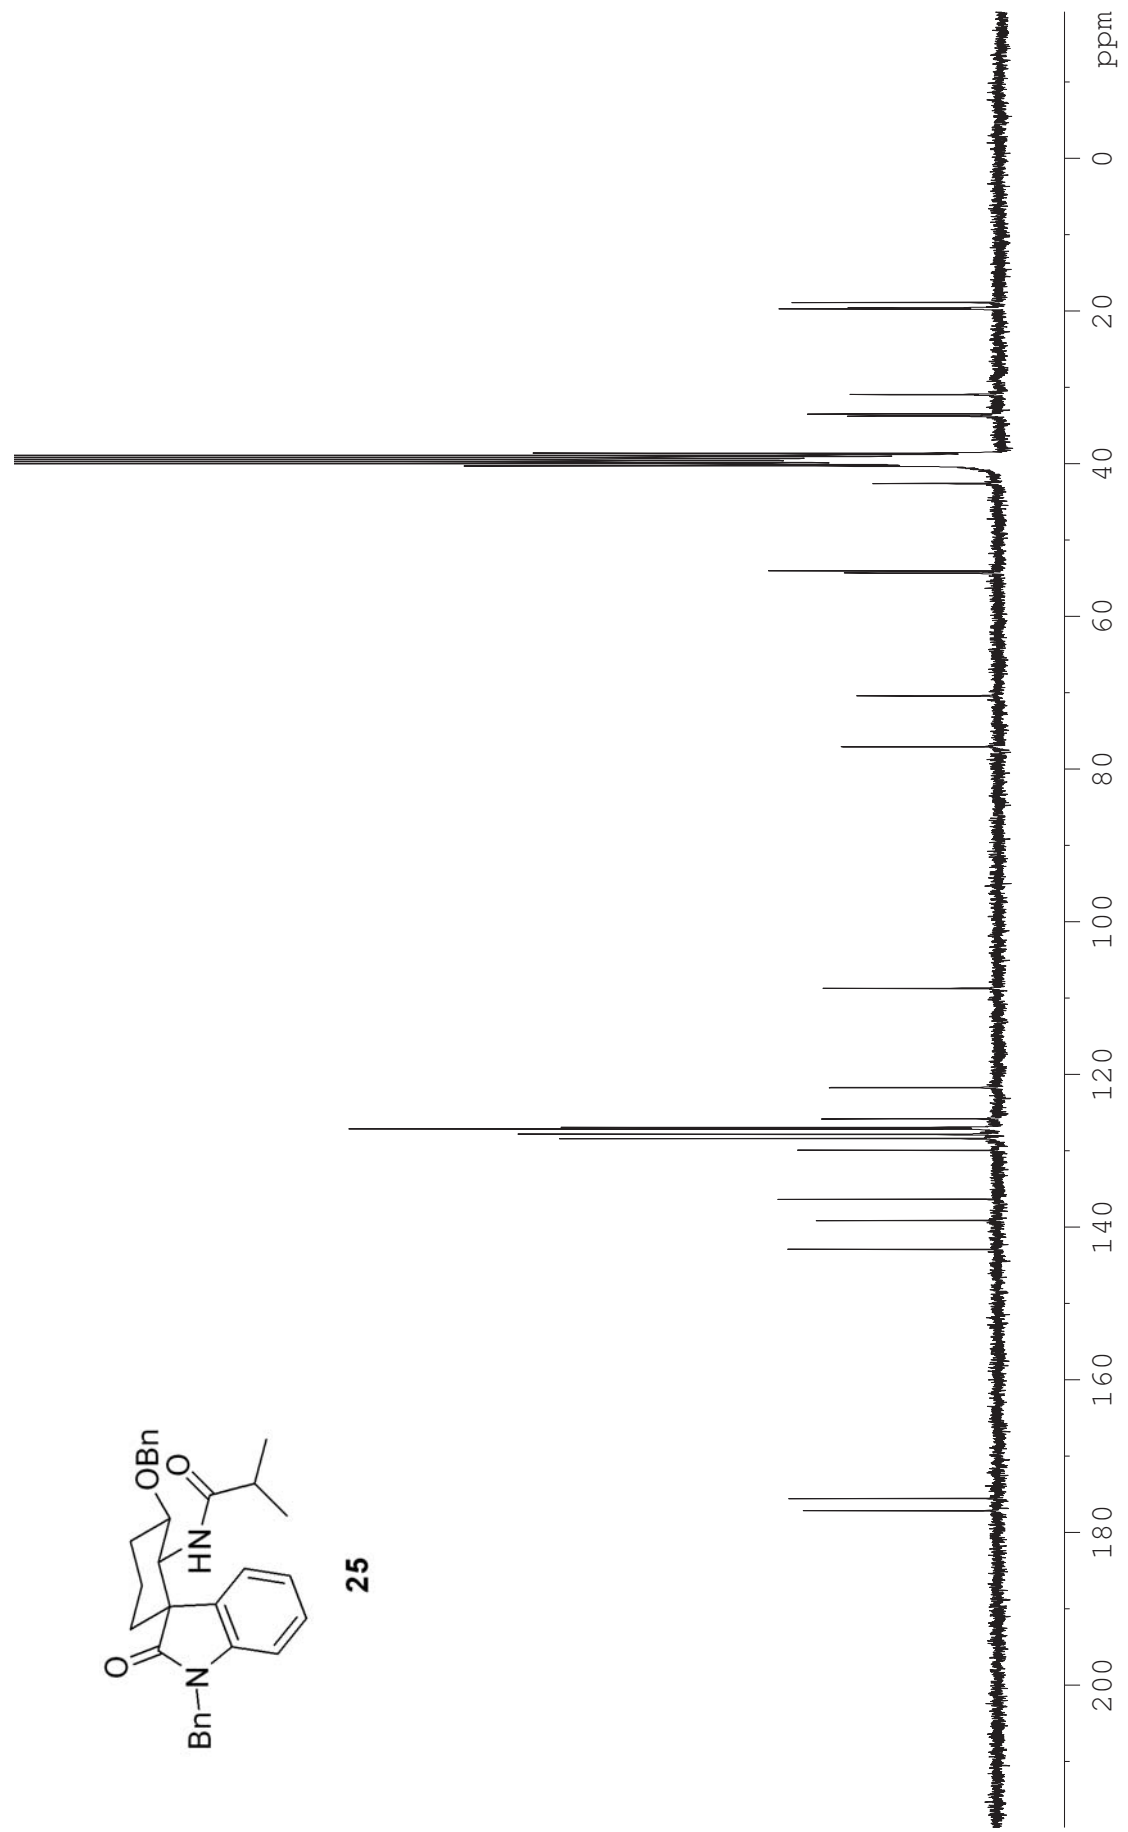

ch12-166-2 repurified 400a

7.931  
7.929  
7.912  
7.910  
7.349  
7.336  
7.331  
7.320  
7.314  
7.306  
7.295  
7.292  
7.288  
7.283  
7.280  
7.259  
7.253  
7.246  
7.244  
7.241  
7.236  
7.226  
7.159  
7.156  
7.140  
6.900  
6.884  
6.881  
6.716  
6.697  
4.981  
4.942  
4.811  
4.772  
4.758  
4.729  
4.720  
4.710  
4.695  
4.686  
4.384  
4.356  
3.965  
3.958  
2.044  
1.997  
1.980  
1.963  
1.665  
1.640  
1.633  
0.854  
0.836  
0.814  
0.797

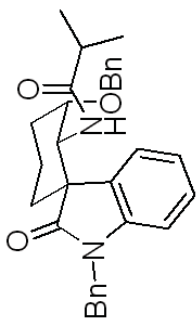

25'

S40

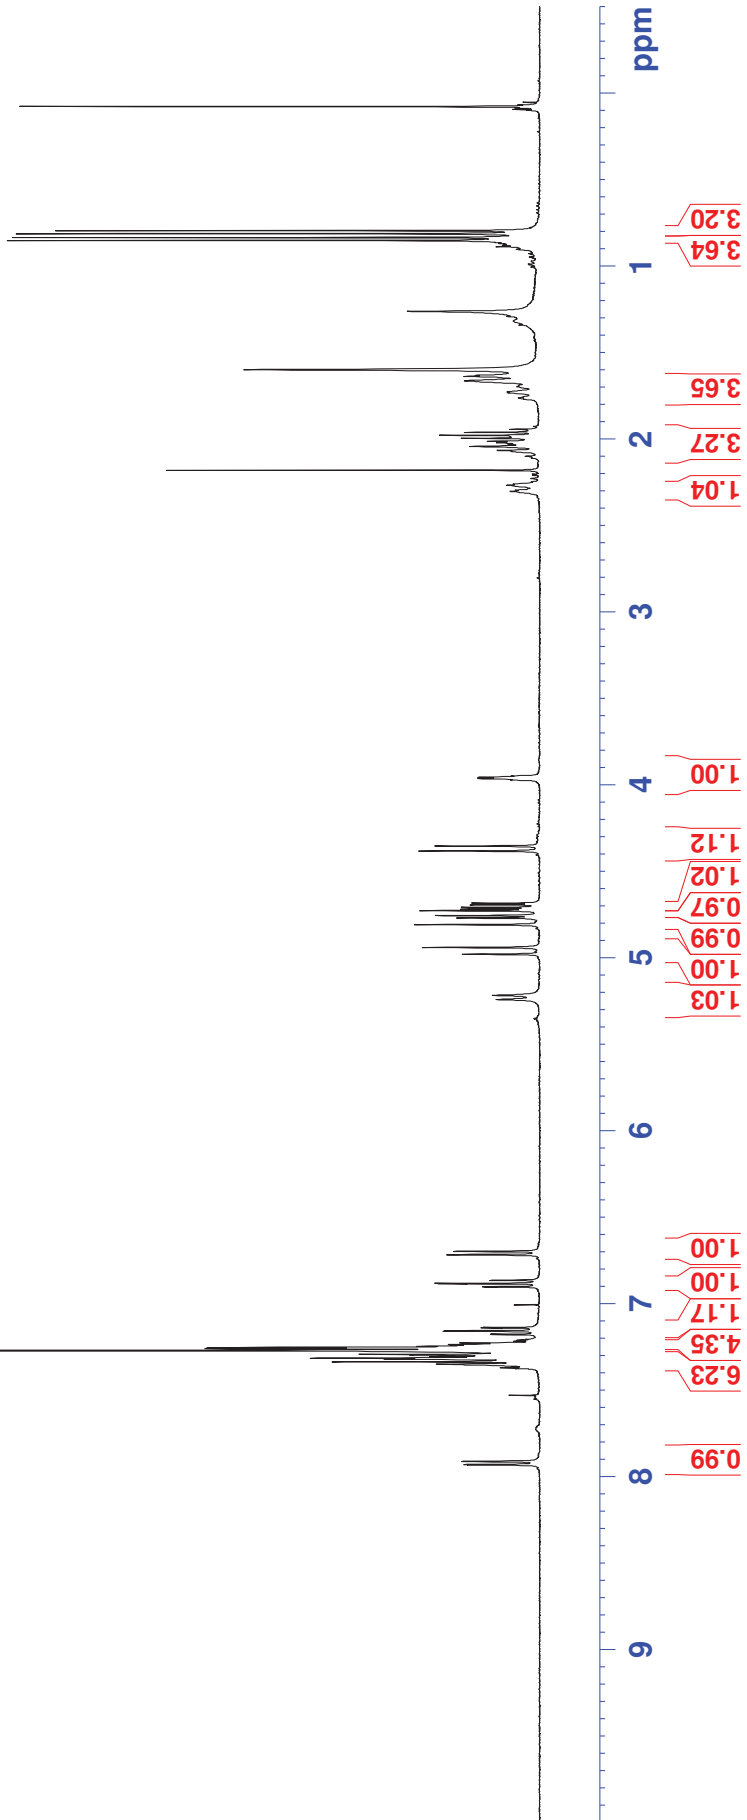



ch12-166-2 C13 400a

179.40  
175.72

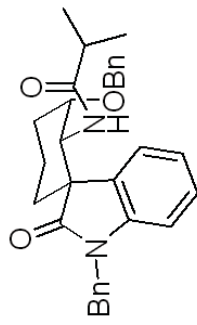

25'

143.53  
138.35  
136.26  
129.97  
128.88  
128.68  
128.36  
128.07  
128.00  
127.96  
127.73  
127.59  
122.02  
108.93

76.04  
71.99  
53.25  
51.39  
44.15  
35.47  
34.31  
27.57  
19.54  
19.42  
15.94

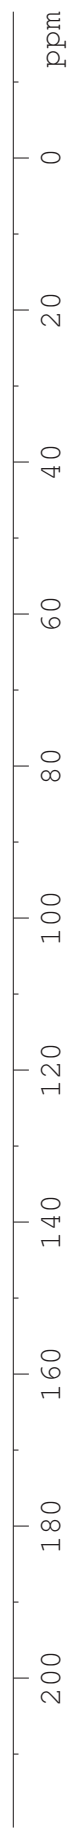

ch12-118-1 400A

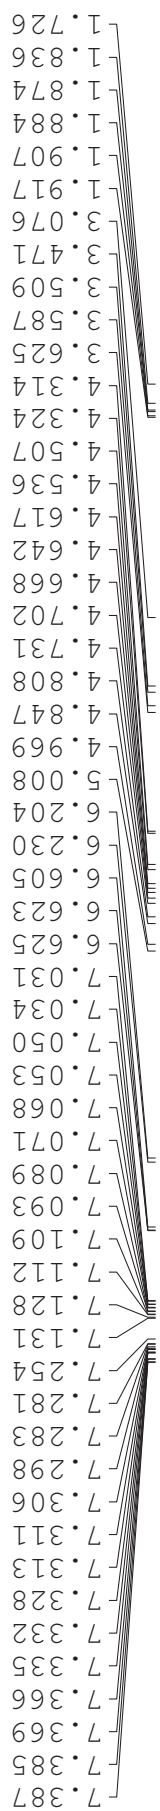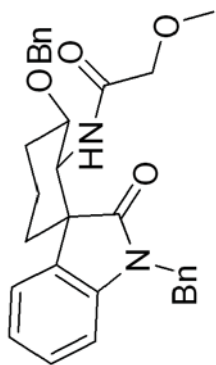

14

ch12-118-1 C13 400a

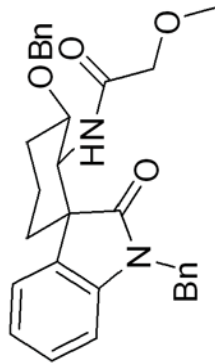

14

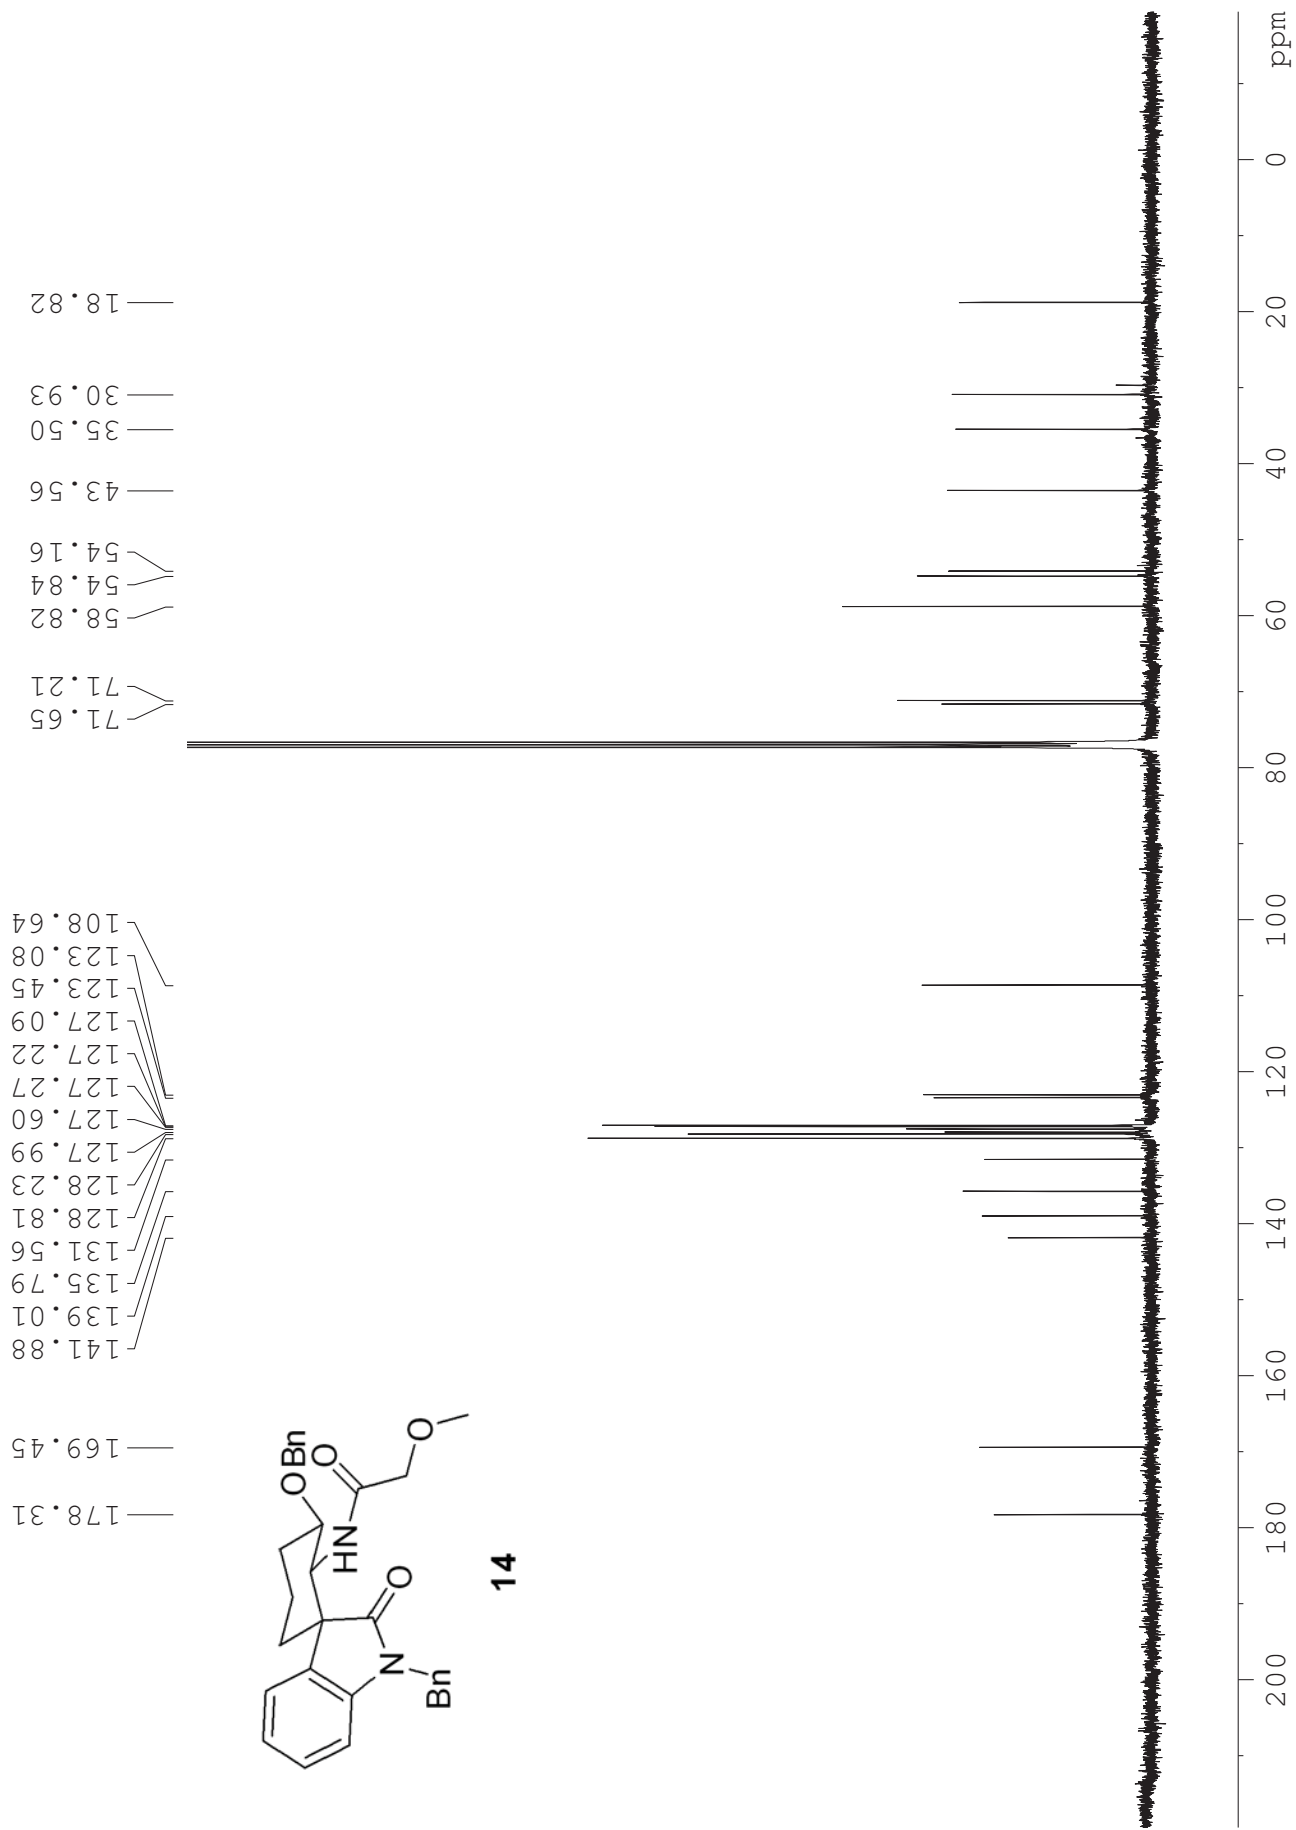

ch12-118-2 400a

7.374  
7.356  
7.325  
7.314  
7.299  
7.186  
7.183  
7.166  
7.164  
7.147  
7.144  
7.080  
7.054  
6.990  
6.988  
6.971  
6.969  
6.952  
6.950  
6.711  
6.692  
5.028  
4.989  
4.823  
4.784  
4.617  
4.607  
4.592  
4.579  
4.549  
4.452  
4.423  
4.063  
4.052  
4.040  
3.912  
3.874  
3.850  
3.813  
3.411  
2.156  
2.144  
2.075  
2.067  
2.040  
1.968  
1.958  
1.882  
1.875  
1.855  
1.832  
1.662  
1.652  
1.636  
1.626

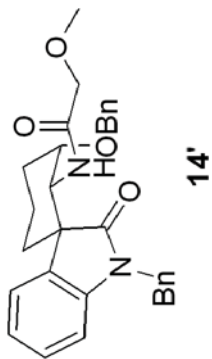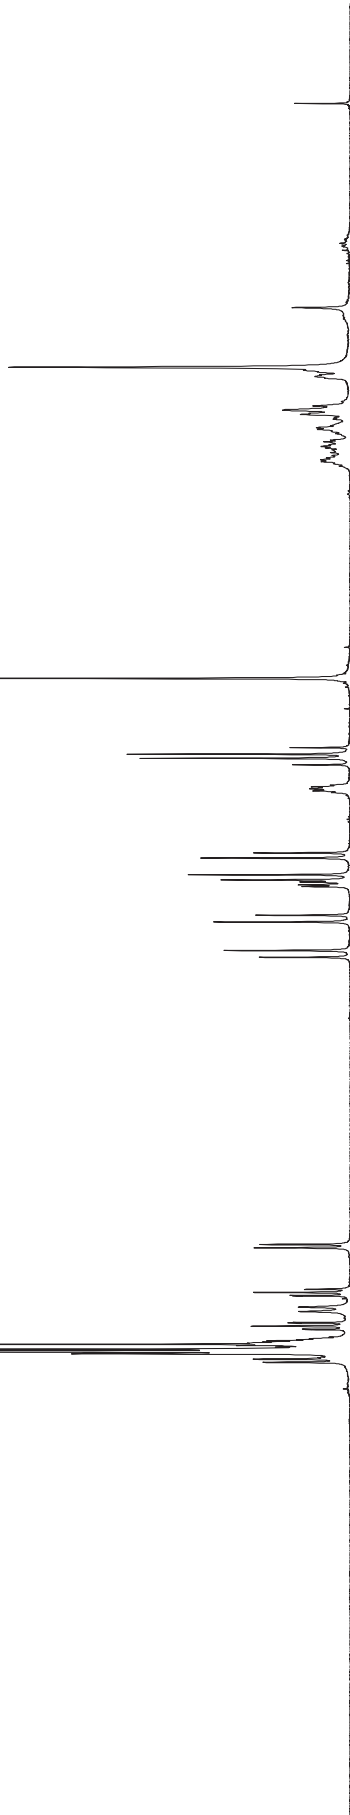

1.35  
7.47  
1.34  
1.11  
1.04  
1.00  
0.97  
0.98  
1.00  
1.04  
0.92  
0.99  
1.00  
3.03  
0.94  
1.08  
1.02  
2.07  
1.15

ch12-118-2 C13

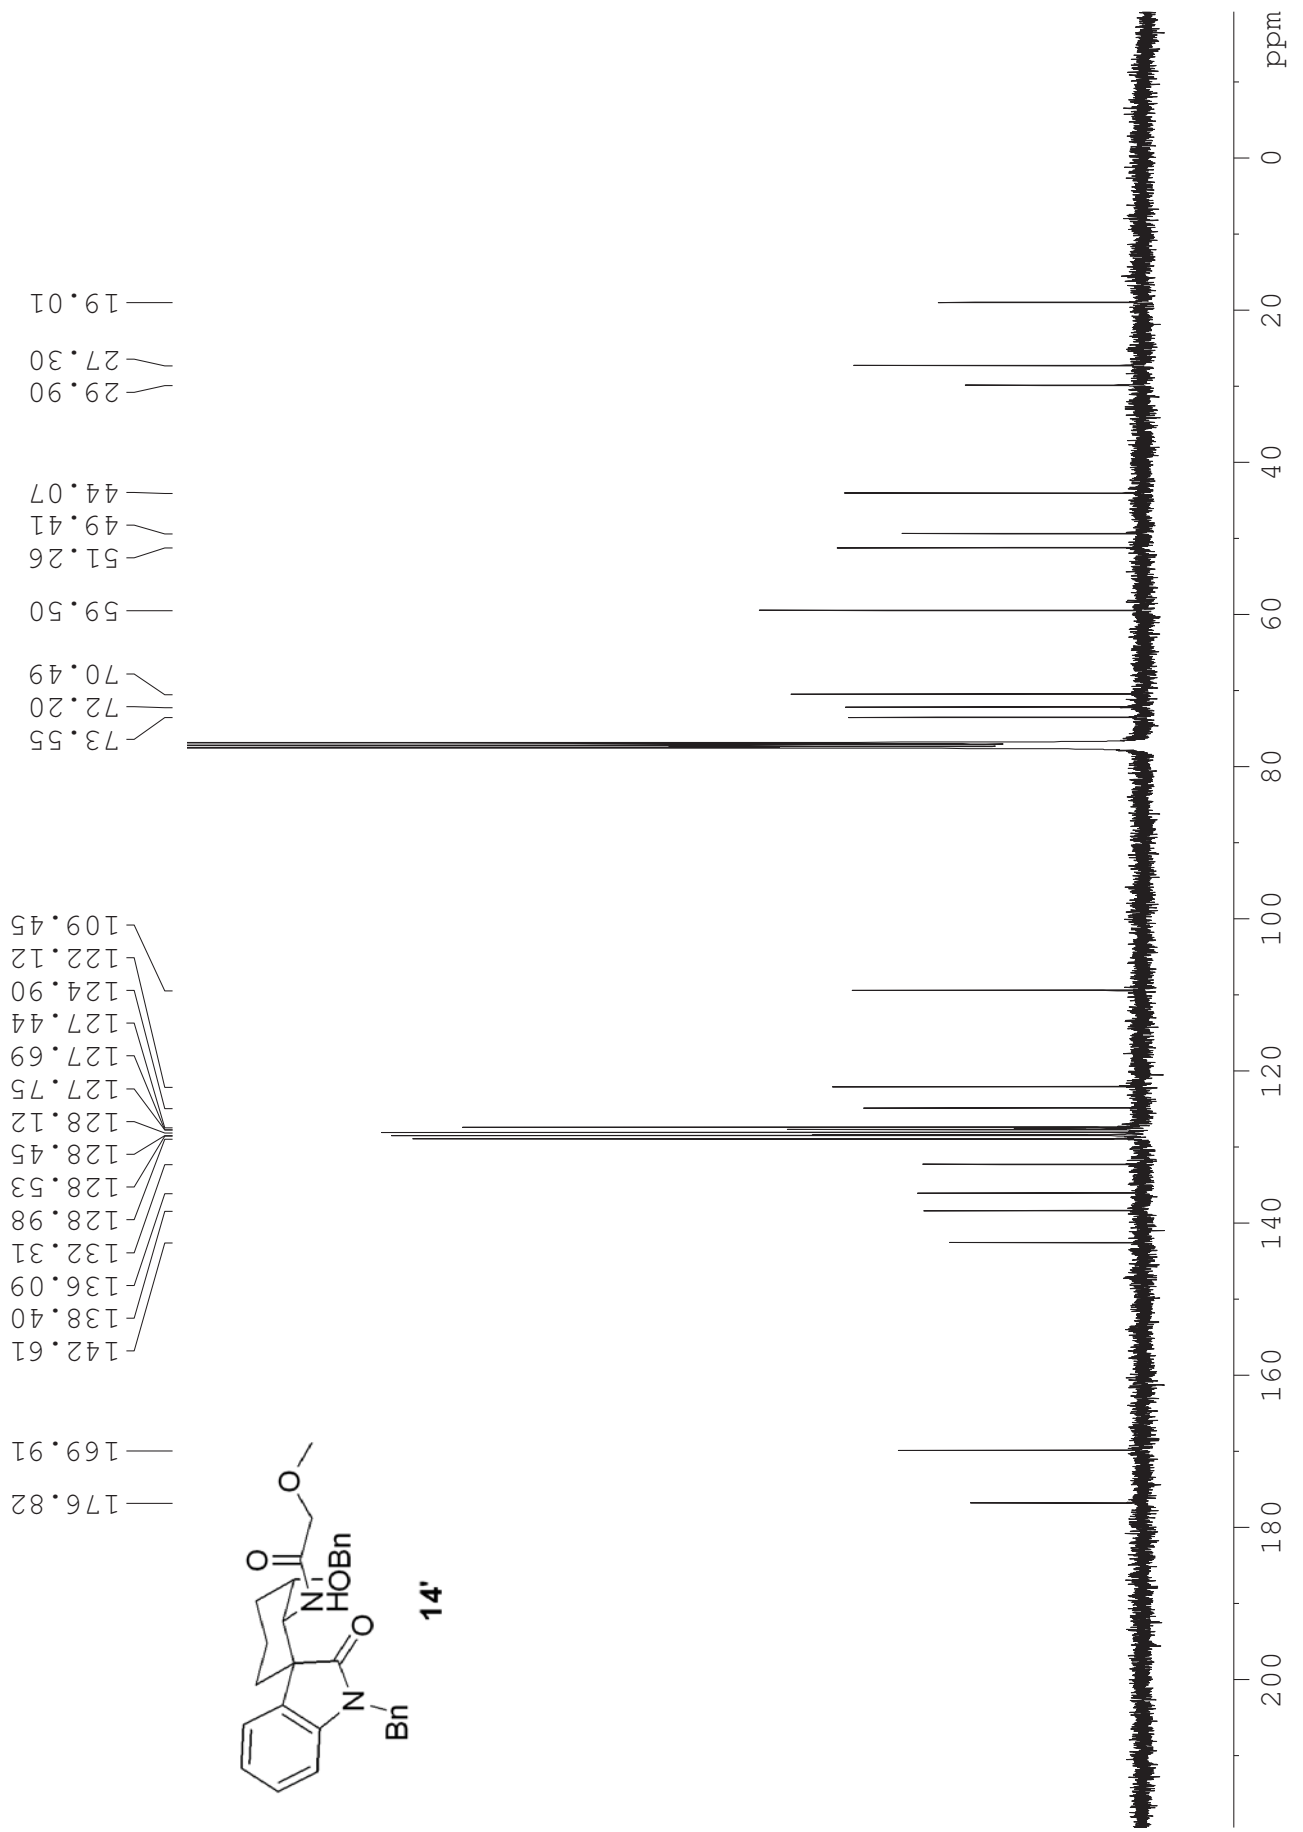

ch12-180-3 600

7.619  
7.606  
7.306  
7.304  
7.301  
7.293  
7.283  
7.279  
7.275  
7.261  
7.257  
7.247  
7.243  
7.240  
7.230  
7.218  
7.077  
7.076  
7.065  
7.064  
7.052  
7.051  
6.926  
6.913  
6.121  
6.104  
5.015  
4.989  
4.716  
4.690  
4.646  
4.626  
4.458  
4.448  
4.438  
4.430  
4.413  
3.876  
3.865  
3.858  
3.847  
3.578  
3.552  
3.438  
3.413  
2.810  
2.414  
2.398  
1.906  
1.898  
1.884  
1.878  
1.855  
1.832  
1.798  
1.496  
1.478  
1.472  
1.464

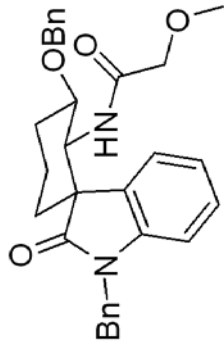

26

945

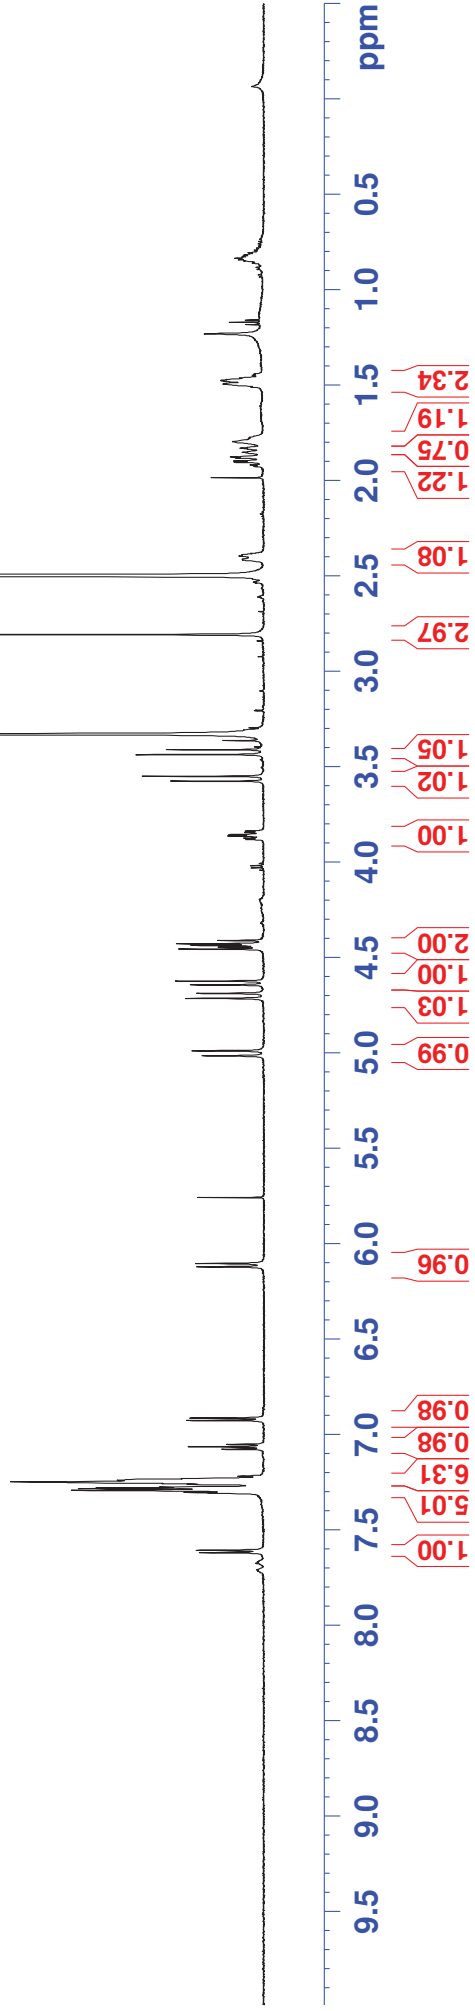

ch12-180-3 C13 400a

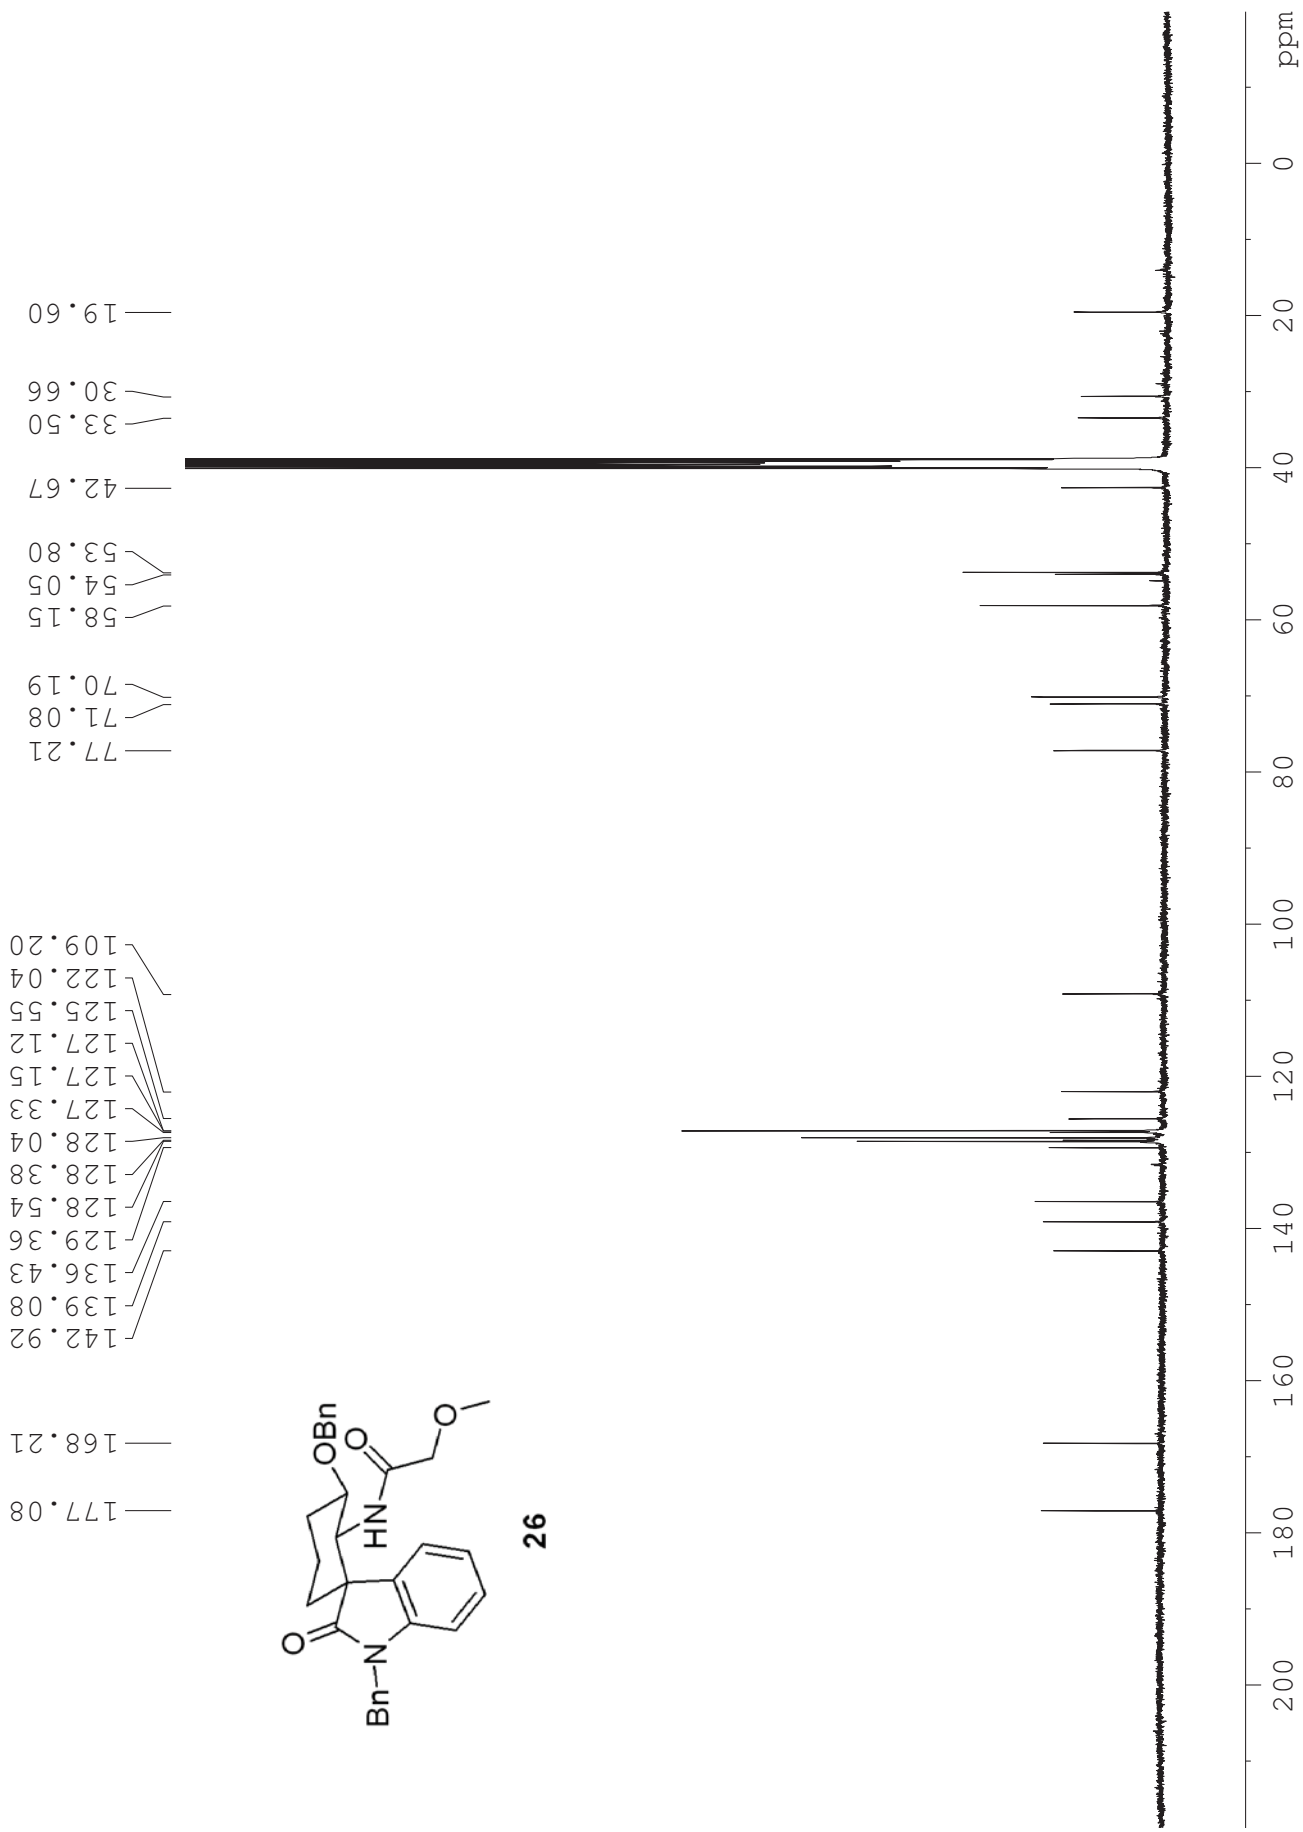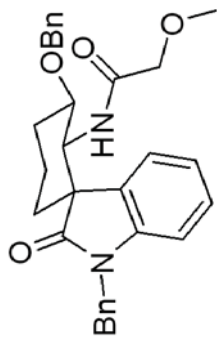

26

ch12-109-1 400a

7.403  
7.401  
7.385  
7.382  
7.279  
7.251  
7.242  
7.233  
7.228  
7.214  
7.151  
7.148  
7.132  
7.129  
7.113  
7.110  
7.091  
7.088  
7.072  
7.069  
7.053  
6.675  
6.673  
6.655  
5.967  
5.964  
5.925  
5.922  
5.632  
5.606  
5.589  
5.563  
5.440  
5.437  
5.414  
5.411  
4.992  
4.973  
4.952  
4.824  
4.785  
4.705  
4.691  
4.675  
4.667  
4.642  
4.484  
4.454  
4.251  
4.240  
1.908  
1.898  
1.832  
1.733  
1.608

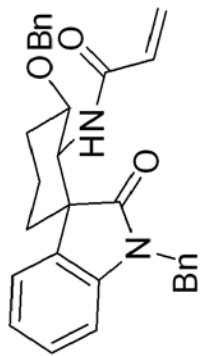

15

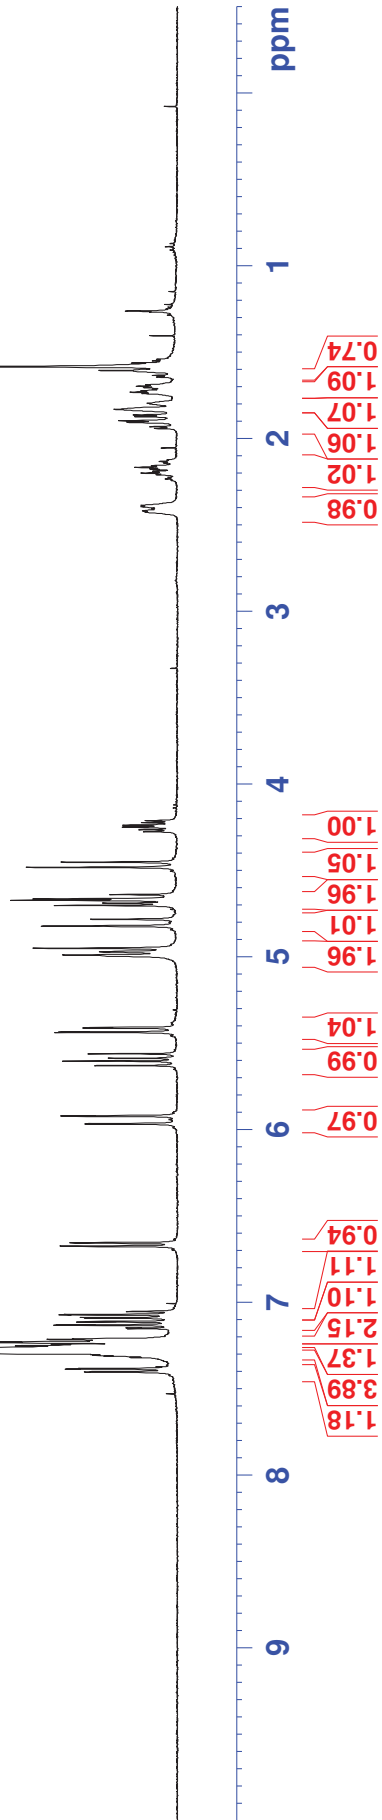



ch12-109-1 C13 300

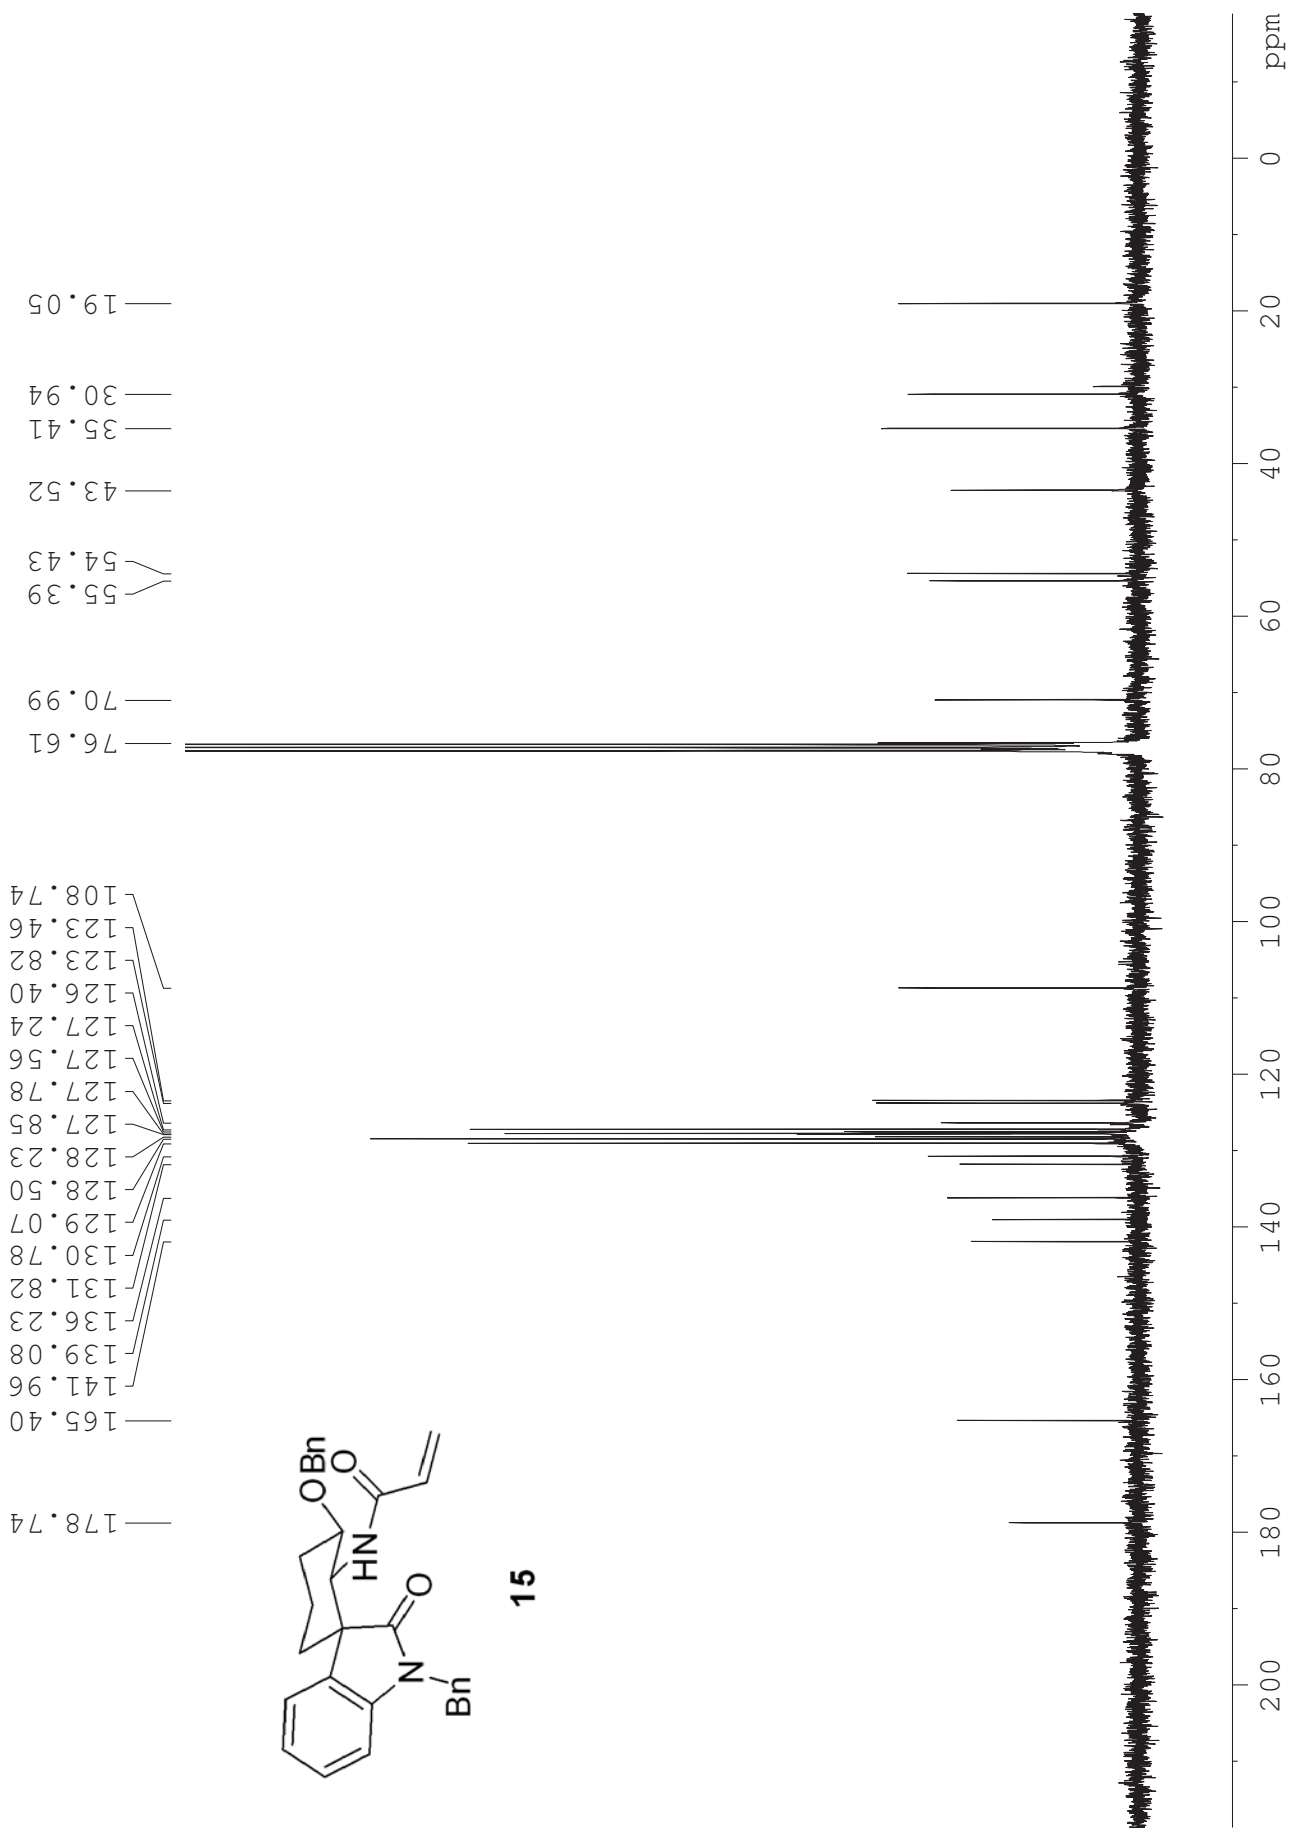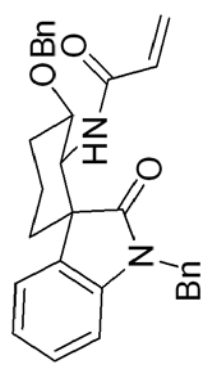

15

ch12-165-3 400a

7.640  
7.621  
7.274  
7.271  
7.258  
7.252  
7.240  
7.234  
7.211  
7.206  
7.201  
7.194  
7.181  
7.170  
7.161  
7.152  
7.146  
7.088  
7.069  
7.051  
6.788  
6.769  
6.175  
6.150  
6.132  
6.107  
6.032  
6.026  
5.989  
5.983  
5.531  
5.525  
5.506  
5.500  
5.100  
5.060  
4.632  
4.627  
4.603  
4.587  
4.576  
4.551  
4.471  
4.442  
3.904  
3.893  
2.394  
2.368  
1.922  
1.896  
1.869  
1.782  
1.490  
1.452  
1.427

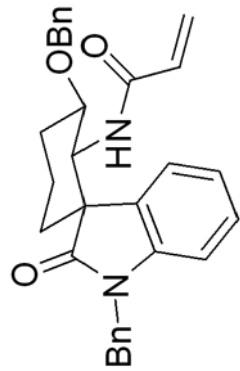

27

Acetone

S50

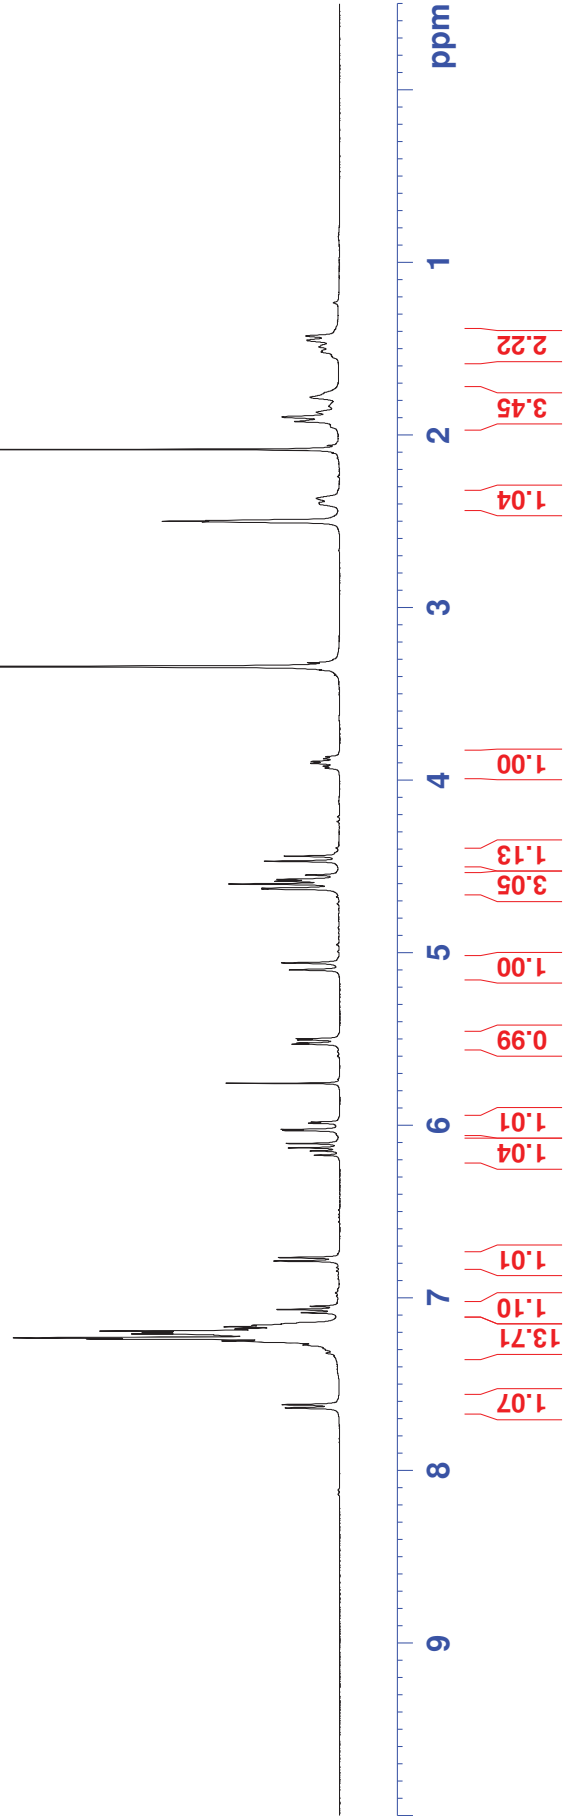

ch12-165-3 C13 400b

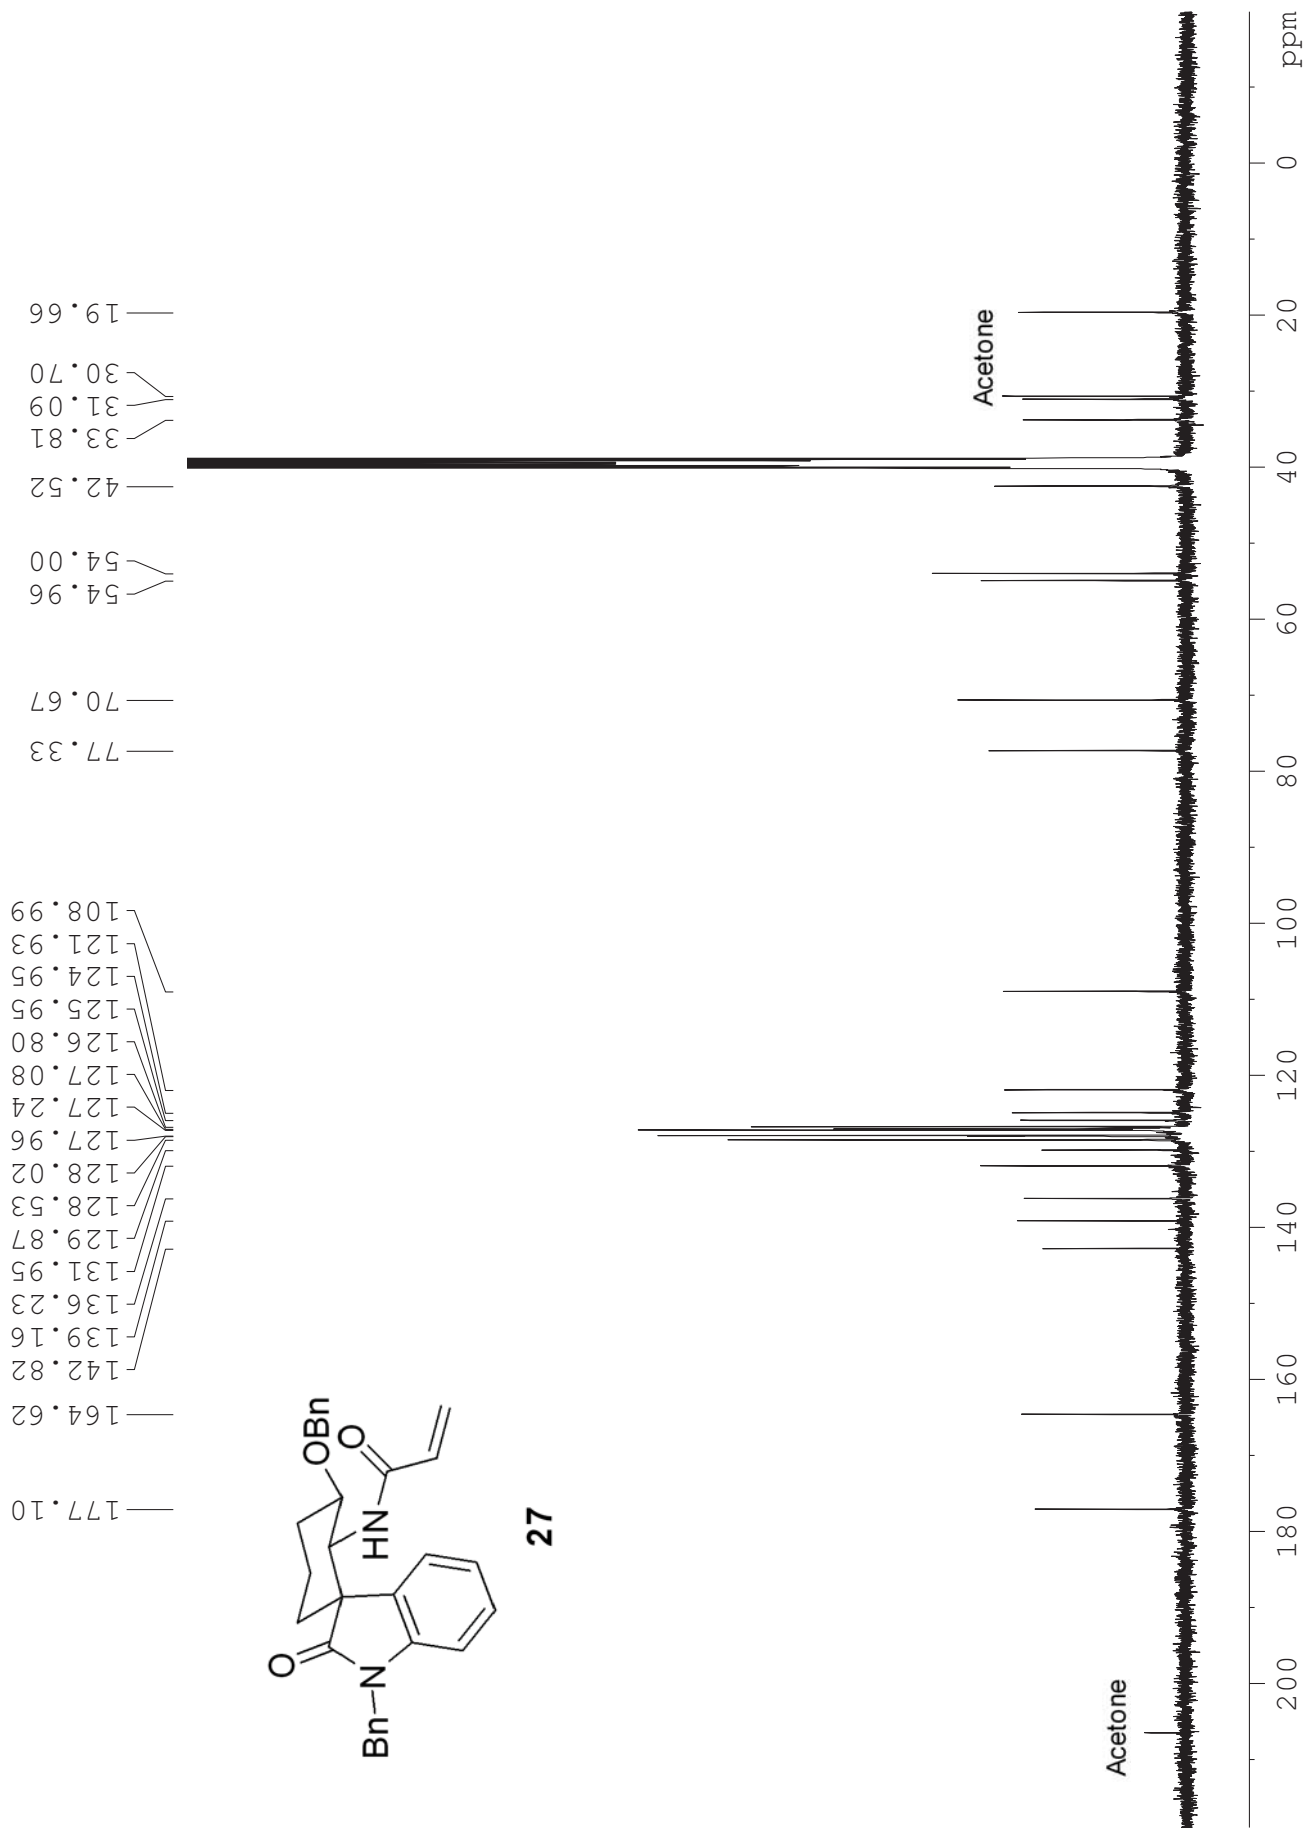

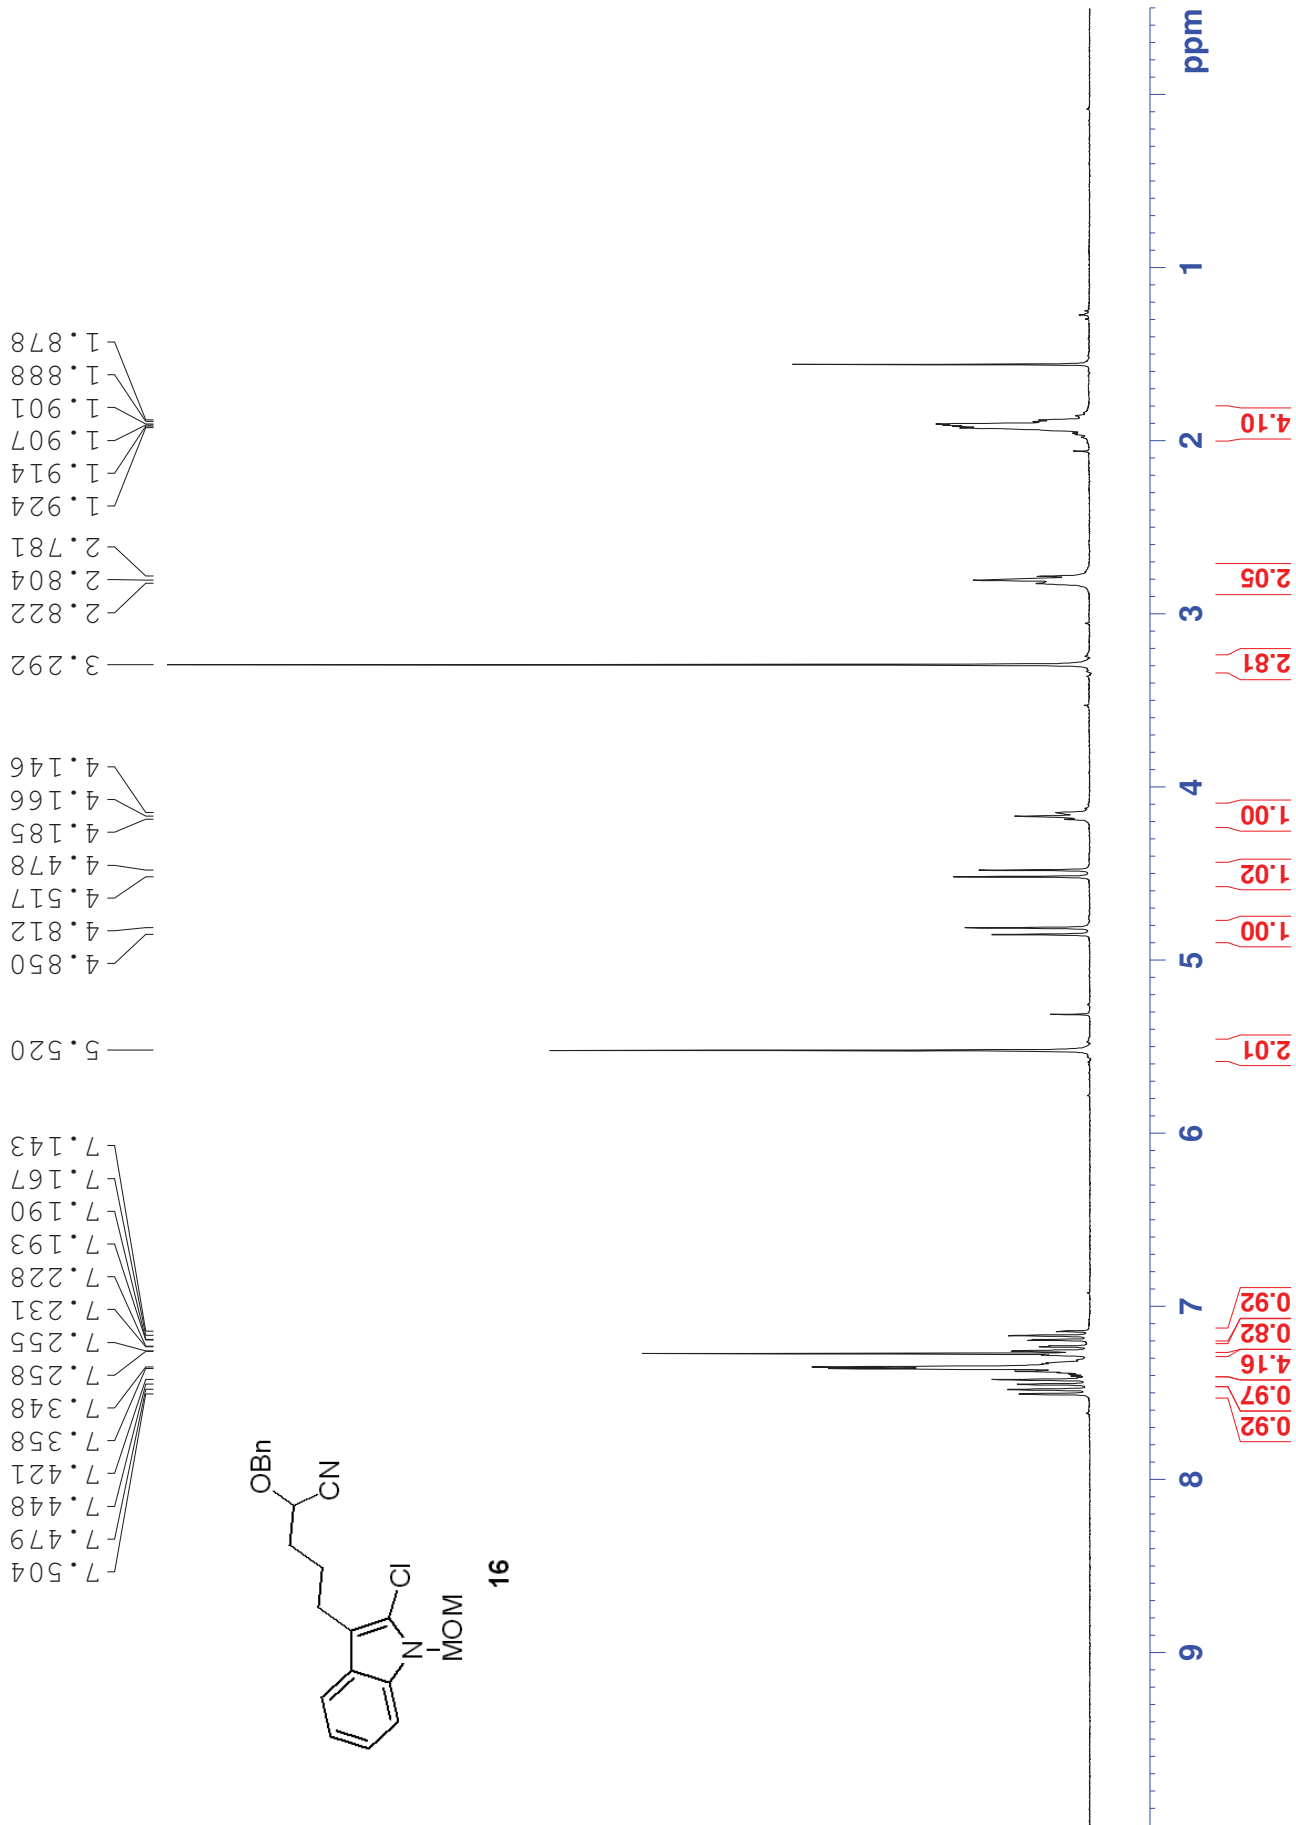

ch11-242 C13 300

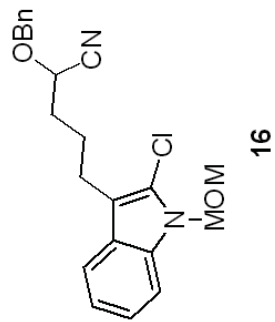

- 136.03
- 135.94
- 128.71
- 128.49
- 128.33
- 127.11
- 123.30
- 122.67
- 120.81
- 118.39
- 118.31
- 112.00
- 109.90
- 73.93
- 72.29
- 67.50
- 56.05
- 32.95
- 24.77
- 23.32

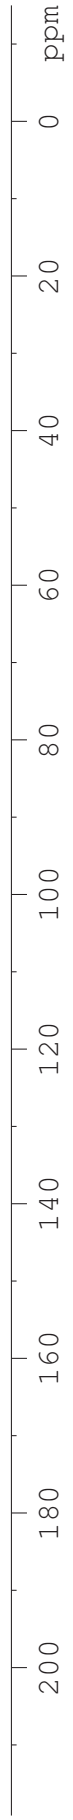

ch12-042-1 300

7.426  
7.423  
7.402  
7.398  
7.307  
7.290  
7.286  
7.267  
7.255  
7.251  
7.243  
7.229  
7.225  
7.195  
7.173  
7.169  
7.155  
7.148  
7.144  
7.138  
7.122  
6.946  
6.941  
6.935  
6.920  
6.914  
5.068  
5.061  
4.955  
4.923  
4.692  
4.618  
4.585  
4.463  
4.423  
3.268  
2.578  
2.566  
2.554  
2.547  
2.542  
2.524  
2.515  
2.139  
2.135  
2.115  
2.110  
2.087  
2.043  
2.020  
2.013  
1.990  
1.883  
1.798

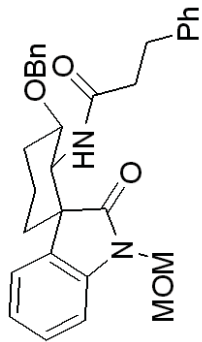

17

S54

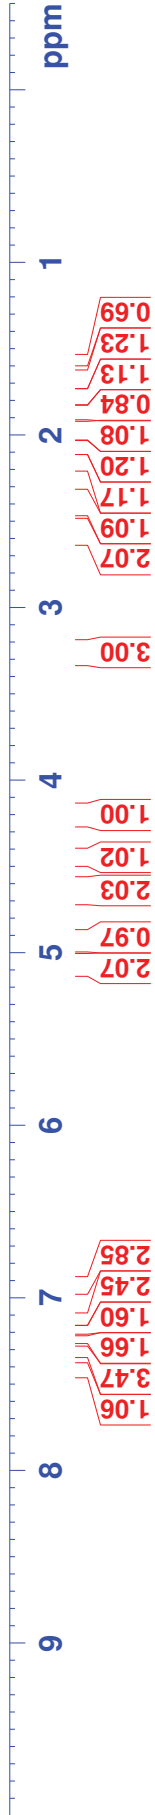

ch12-042-1 C13 300

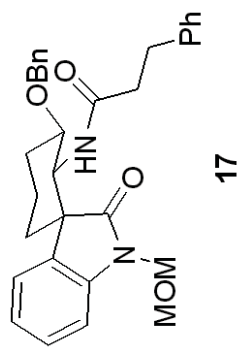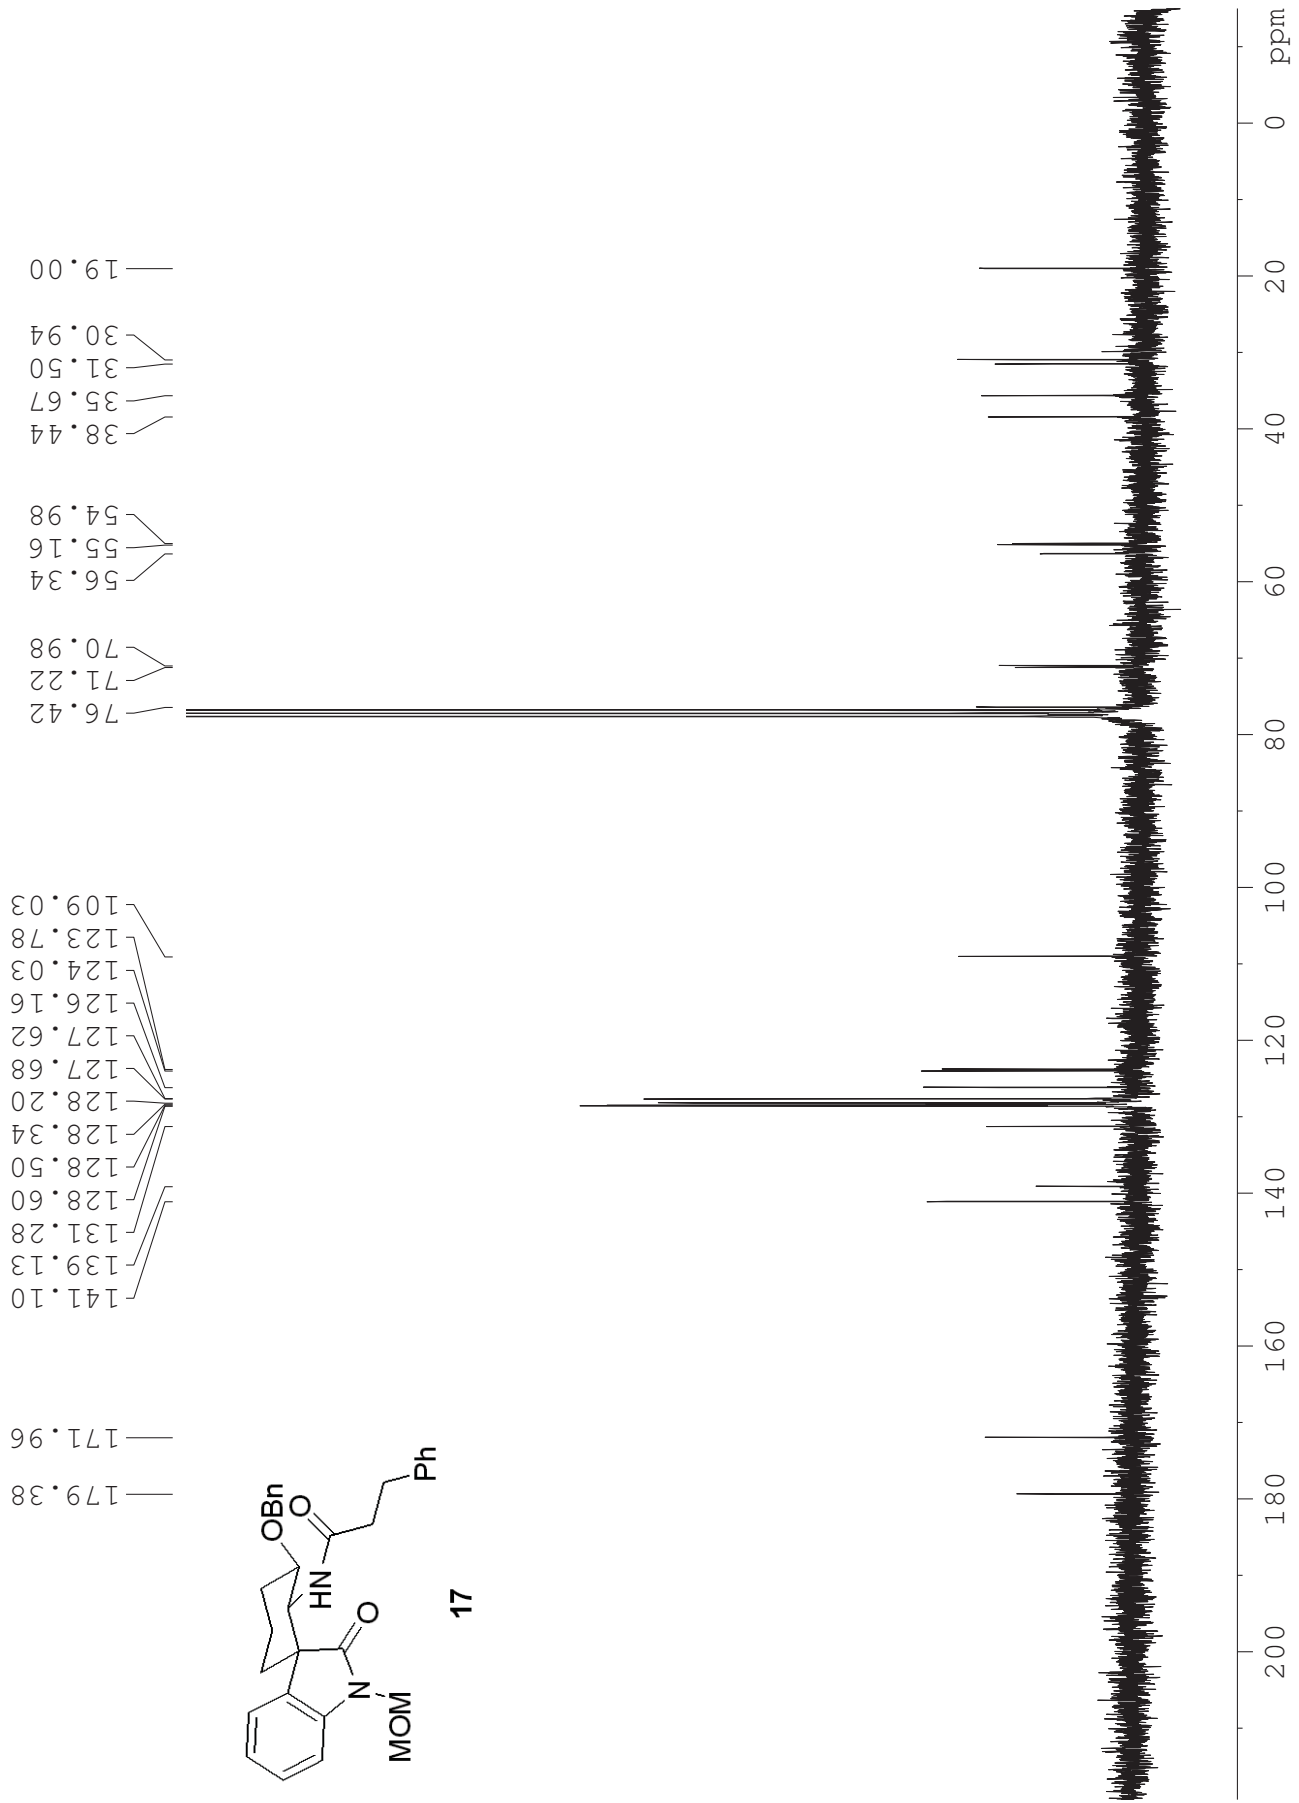

ch12-077-2 301

5.755  
4.635  
4.596  
4.473  
4.434  
4.401  
4.367  
3.864  
3.842  
3.828  
3.806  
3.792  
3.105  
2.384  
2.345  
2.213  
2.191  
2.183  
2.165  
2.143  
2.134  
2.112  
2.095  
2.085  
2.073  
2.062  
2.047  
2.040  
2.025  
2.015  
1.868  
1.838  
1.798  
1.745  
1.476

8.315  
7.630  
7.606

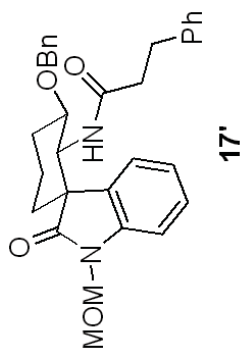

S56

CH<sub>3</sub>Cl

CH<sub>2</sub>Cl<sub>2</sub>

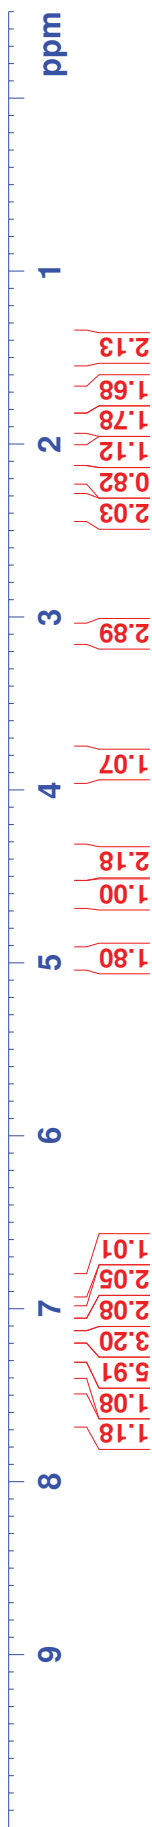



ch12-077-2 C13 301

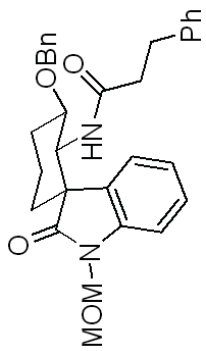

17'

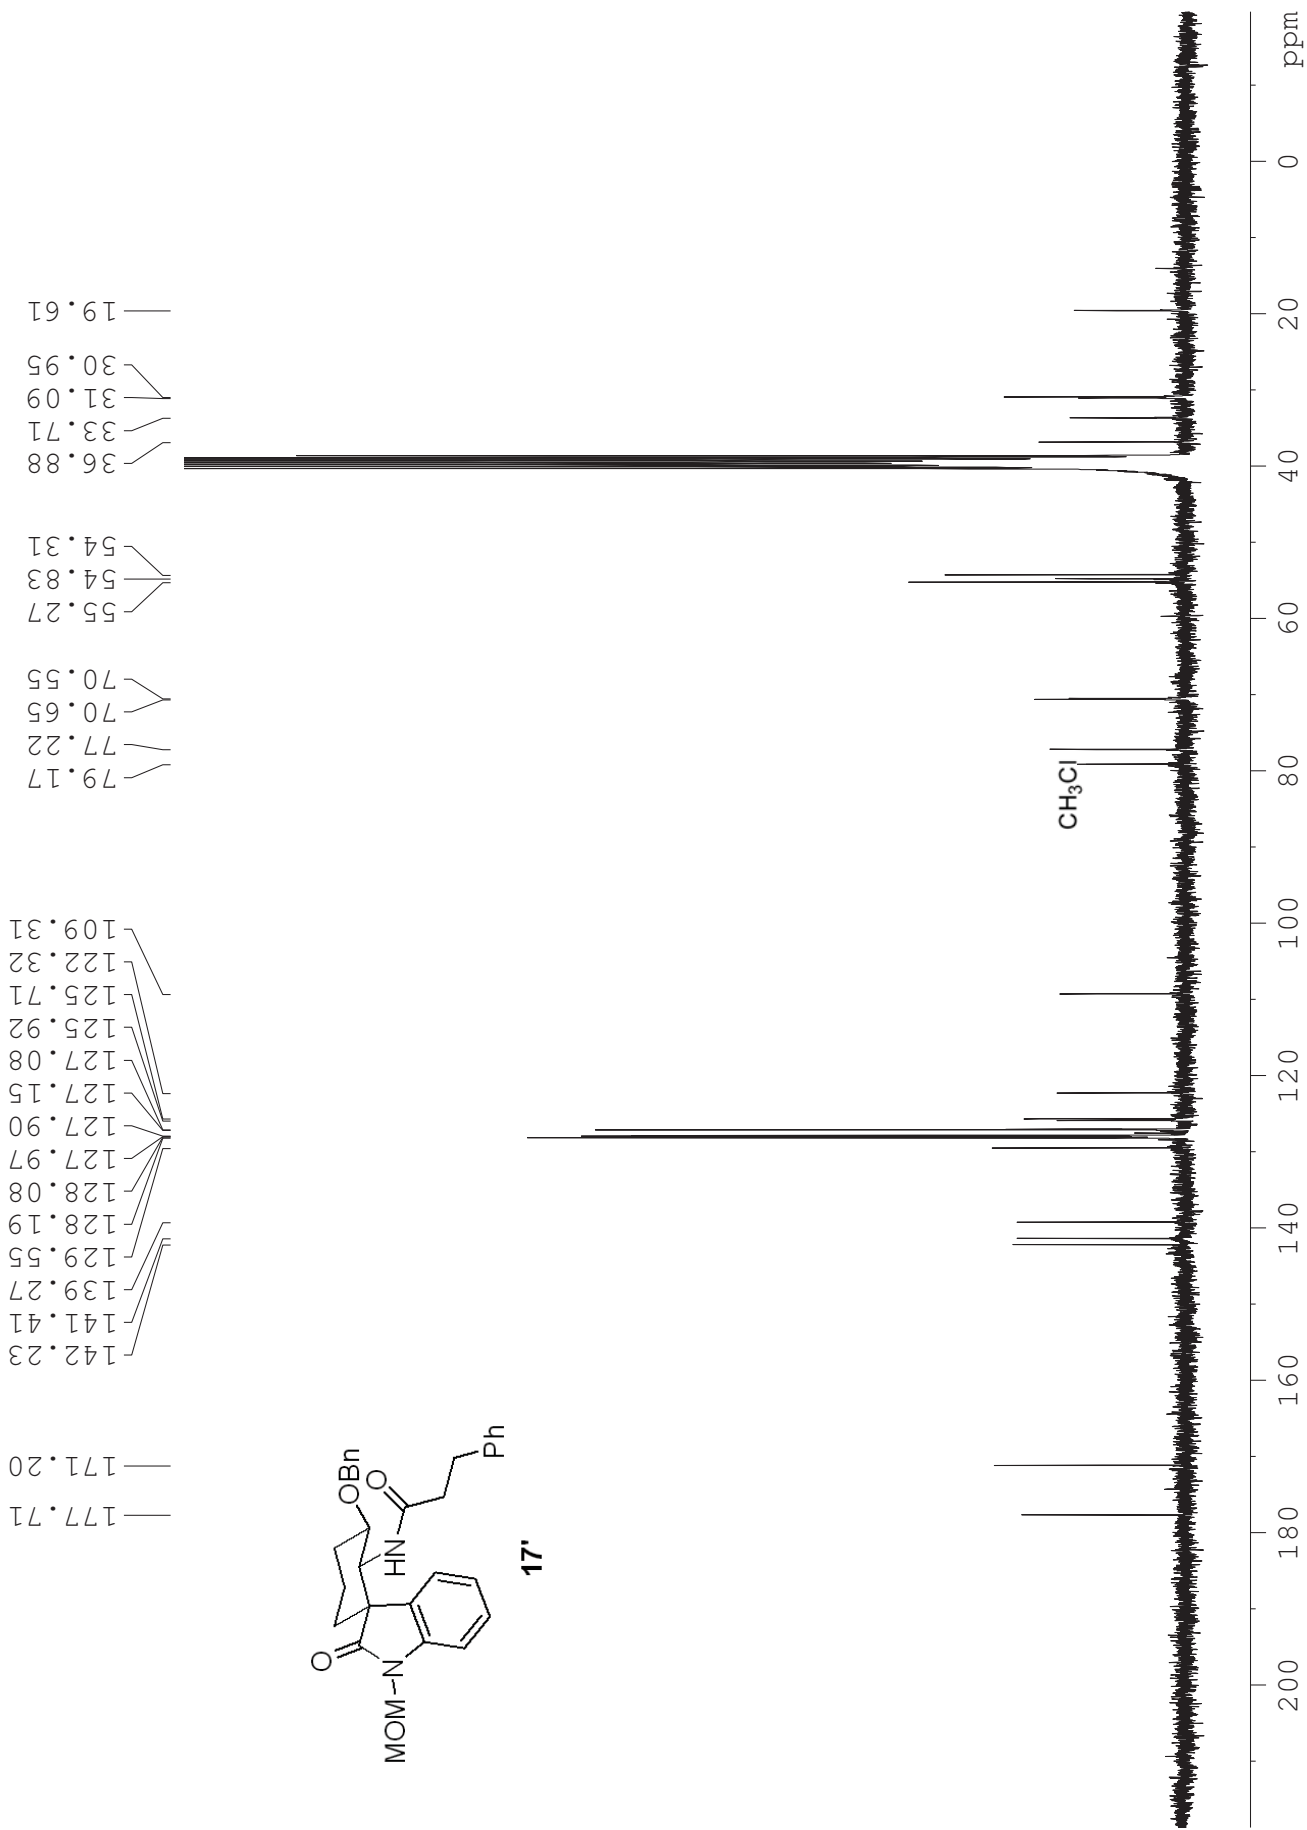

ch11-233-1 500

7.388  
7.373  
7.306  
7.303  
7.296  
7.235  
7.218  
7.203  
7.131  
7.117  
7.101  
6.931  
6.916  
5.129  
5.108  
5.098  
5.076  
4.912  
4.892  
4.707  
4.684  
4.622  
4.602  
4.582  
4.495  
4.471  
4.241  
4.232  
4.220  
4.211  
4.199  
4.190  
3.339  
2.399  
2.380  
2.164  
2.137  
1.934  
1.927  
1.916  
1.902  
1.888  
1.874  
1.861  
1.805  
1.777  
1.712  
1.684  
1.630  
1.622  
1.603  
0.846  
0.833  
0.609  
0.596

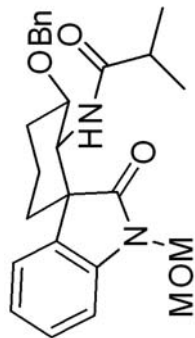

18

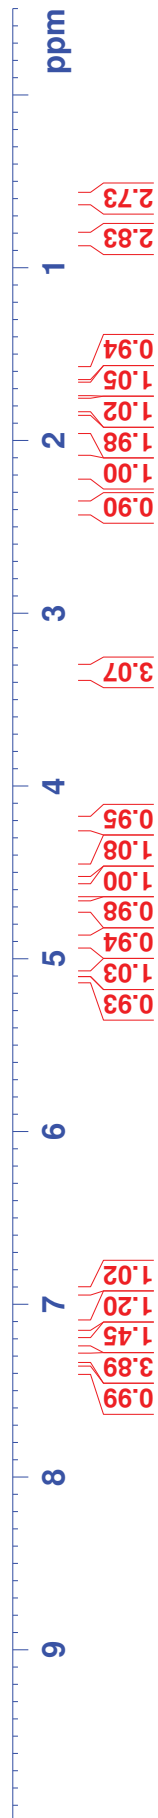

ch11-233-1 300 C13

179.55  
176.65

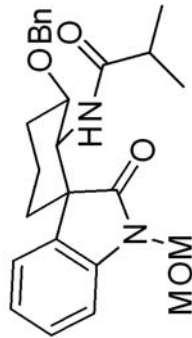

18

141.26  
139.20  
131.23  
128.60  
128.49  
128.33  
127.73  
127.73  
127.63  
124.23  
123.82  
108.85

76.34  
71.36  
71.09

56.57  
55.18  
54.90

36.00  
35.34  
31.14

19.90  
19.12  
19.00

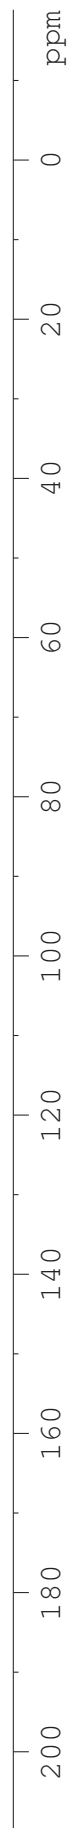

ch11-233-2 500

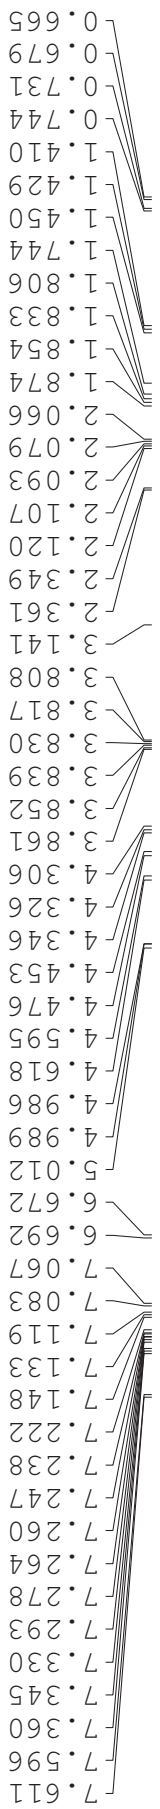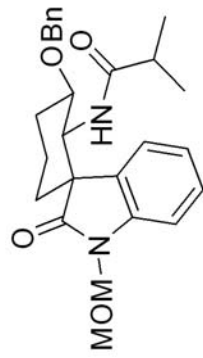

18'

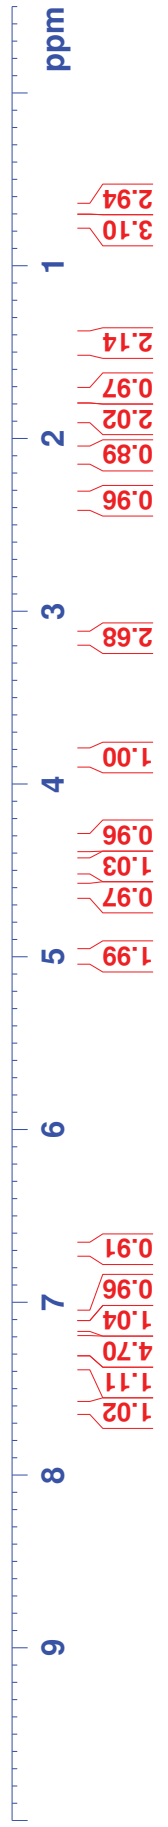

ch11-233-2 C13 300

177.78  
175.64

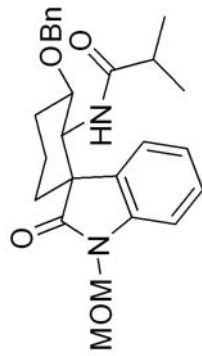

18'

142.34  
139.20  
129.63  
128.05  
127.90  
127.22  
127.06  
125.90  
122.28  
109.13

77.04  
70.67  
70.50

55.63  
54.45  
54.30

33.61  
33.53  
30.98  
19.72  
19.62  
18.91

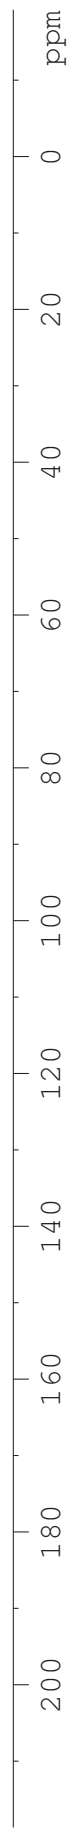

ch12-038-1 301a

7.420  
7.396  
7.236  
7.222  
7.220  
7.197  
7.146  
7.122  
7.097  
6.942  
6.916  
6.038  
6.038  
5.982  
5.979  
5.742  
5.707  
5.685  
5.651  
5.468  
5.465  
5.434  
5.431  
5.101  
5.097  
5.052  
5.019  
4.712  
4.702  
4.671  
4.636  
4.487  
4.447  
4.224  
4.209  
2.385  
2.374  
2.092  
1.900  
1.888  
1.857  
1.857  
1.844  
1.808  
1.731  
1.720  
1.709  
1.699  
1.687  
1.676  
1.665  
1.653  
1.609  
1.598  
1.572  
1.561

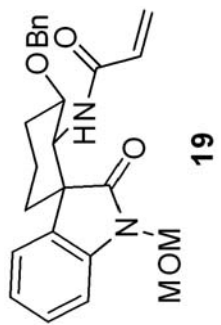

S62

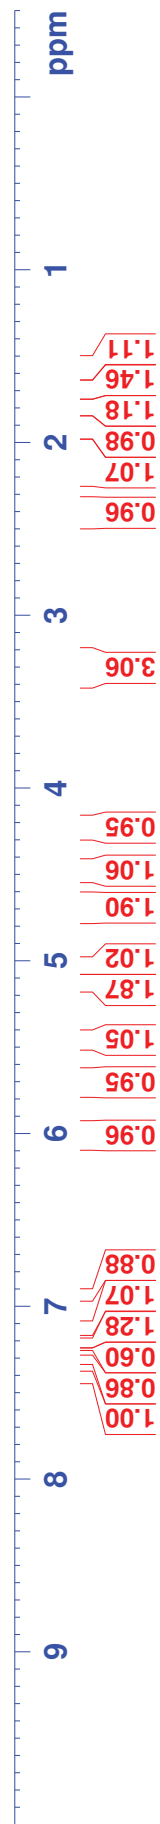

ch12-038-1 300 C13

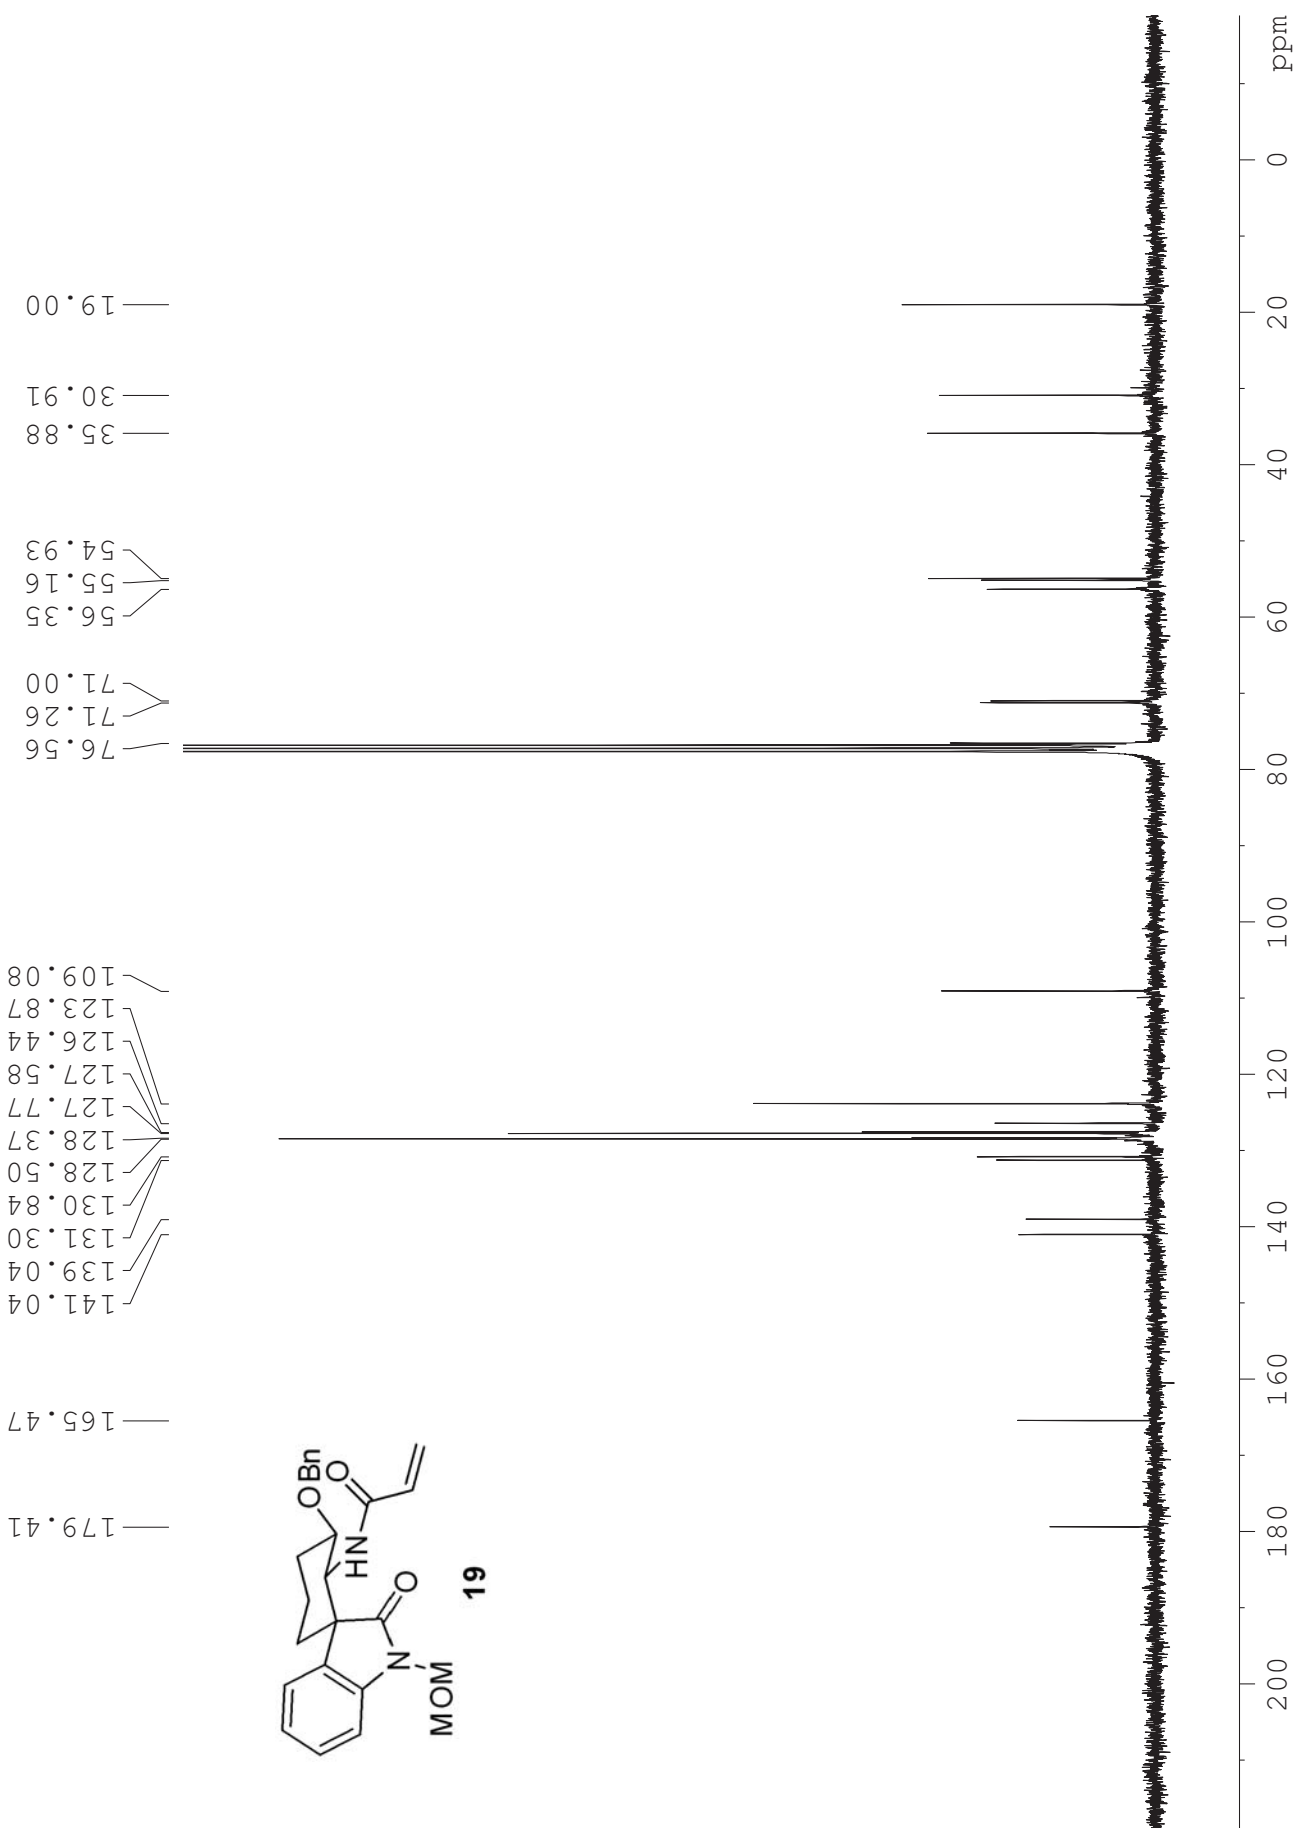

ch12-079 301a

7.387  
7.362  
7.300  
7.087  
7.063  
7.037  
6.209  
6.203  
6.152  
6.147  
6.099  
6.066  
6.042  
6.009  
5.616  
5.610  
5.582  
5.577  
5.171  
5.134  
5.118  
5.081  
4.666  
4.652  
4.633  
4.619  
4.566  
4.527  
4.483  
4.444  
4.035  
4.021  
4.008  
3.994  
3.319  
2.155  
2.146  
2.136  
2.125  
2.056  
2.020  
2.006  
1.973  
1.959  
1.914  
1.900  
1.883  
1.870  
1.854  
1.843  
1.815  
1.690  
1.678  
1.669  
1.643

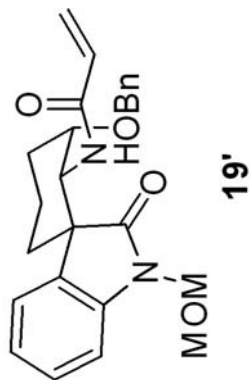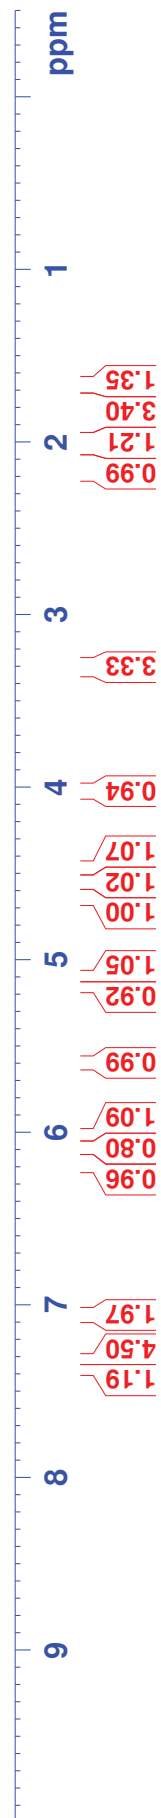



ch12-079 C13

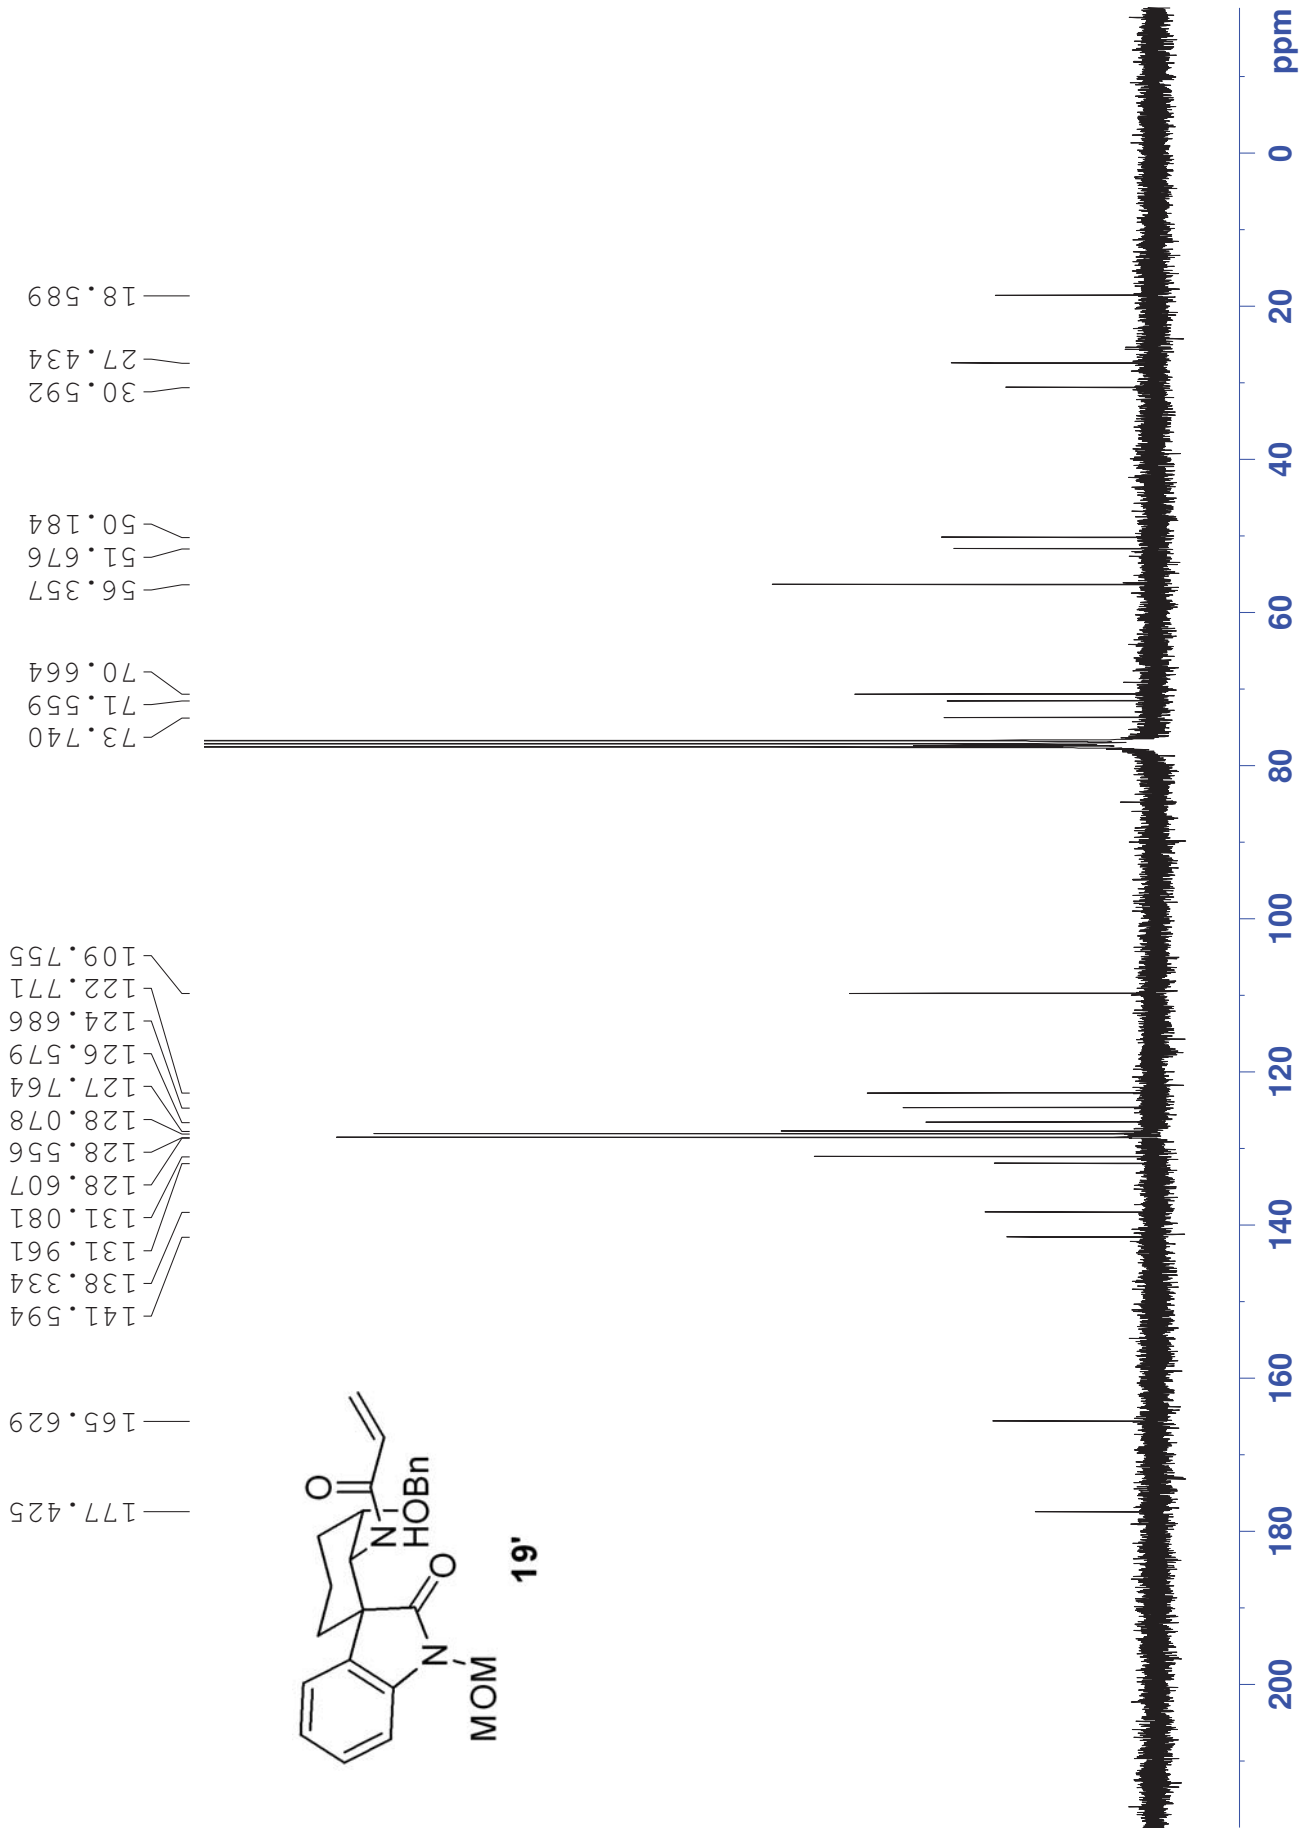

ch12-054-1 301a

7.342  
7.317  
7.252  
7.231  
7.223  
7.215  
7.212  
7.190  
7.187  
7.164  
7.164  
7.162  
7.105  
7.105  
7.081  
7.056  
7.056  
6.903  
6.877  
6.877  
5.056  
5.018  
4.985  
4.689  
4.649  
4.577  
4.544  
4.510  
4.459  
4.420  
4.187  
4.173  
3.291  
3.211  
3.206  
3.189  
3.167  
3.160  
2.412  
2.390  
2.382  
2.361  
2.341  
2.330  
2.206  
2.182  
2.157  
2.132  
2.107  
2.060  
2.015  
1.851  
1.839  
1.796  
1.767  
1.767  
1.676  
1.630  
1.550

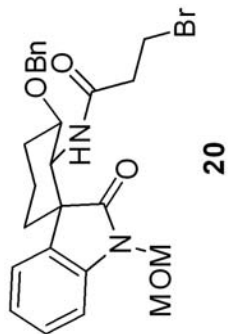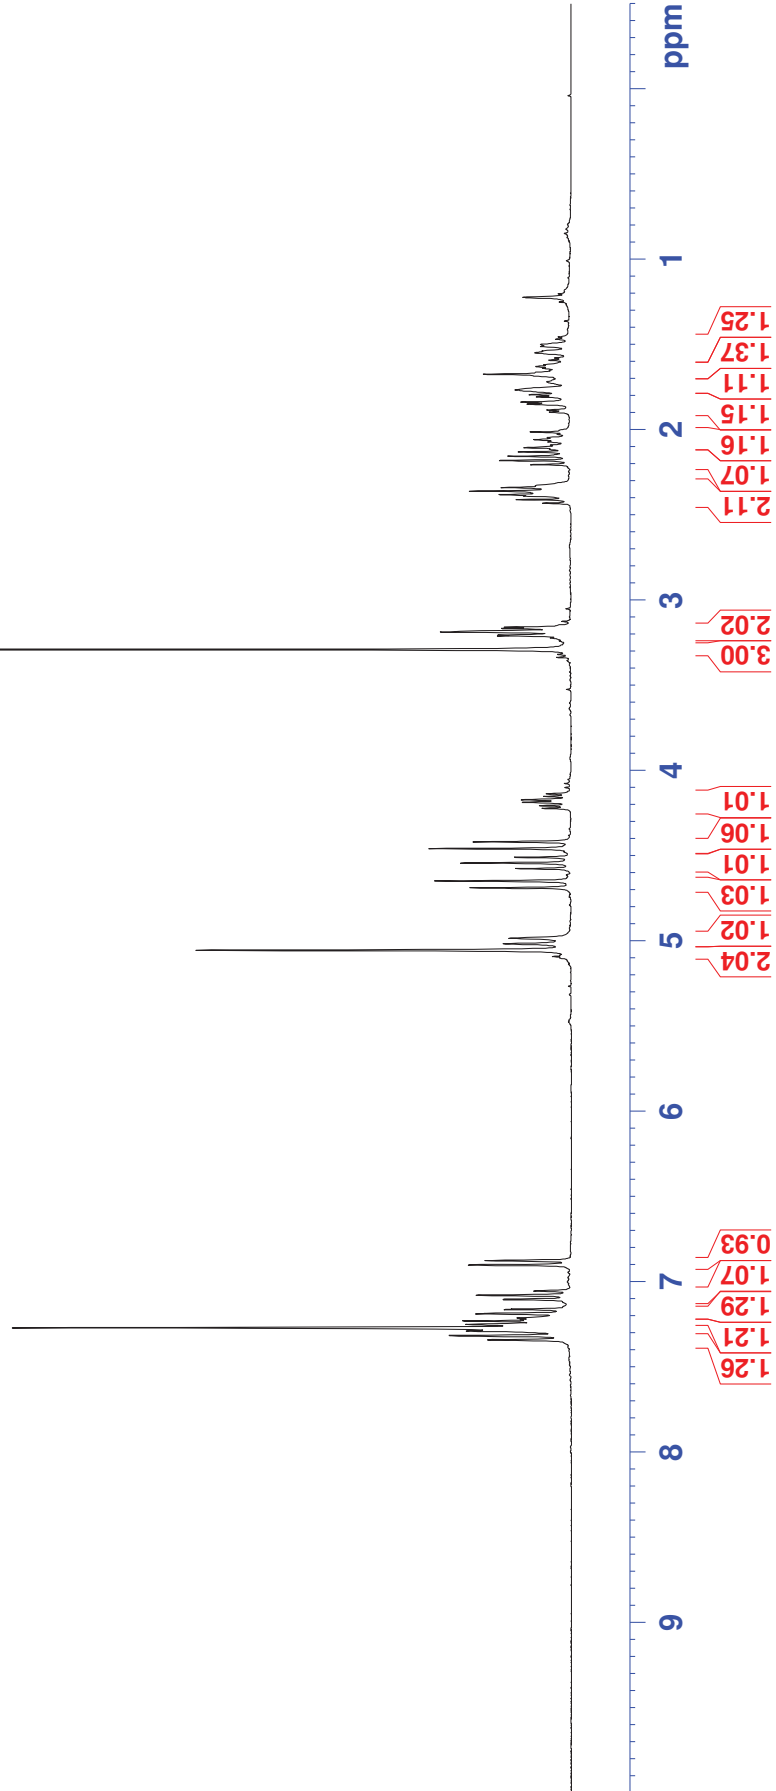

ch12-054-1 C13 300

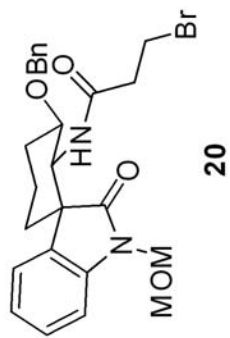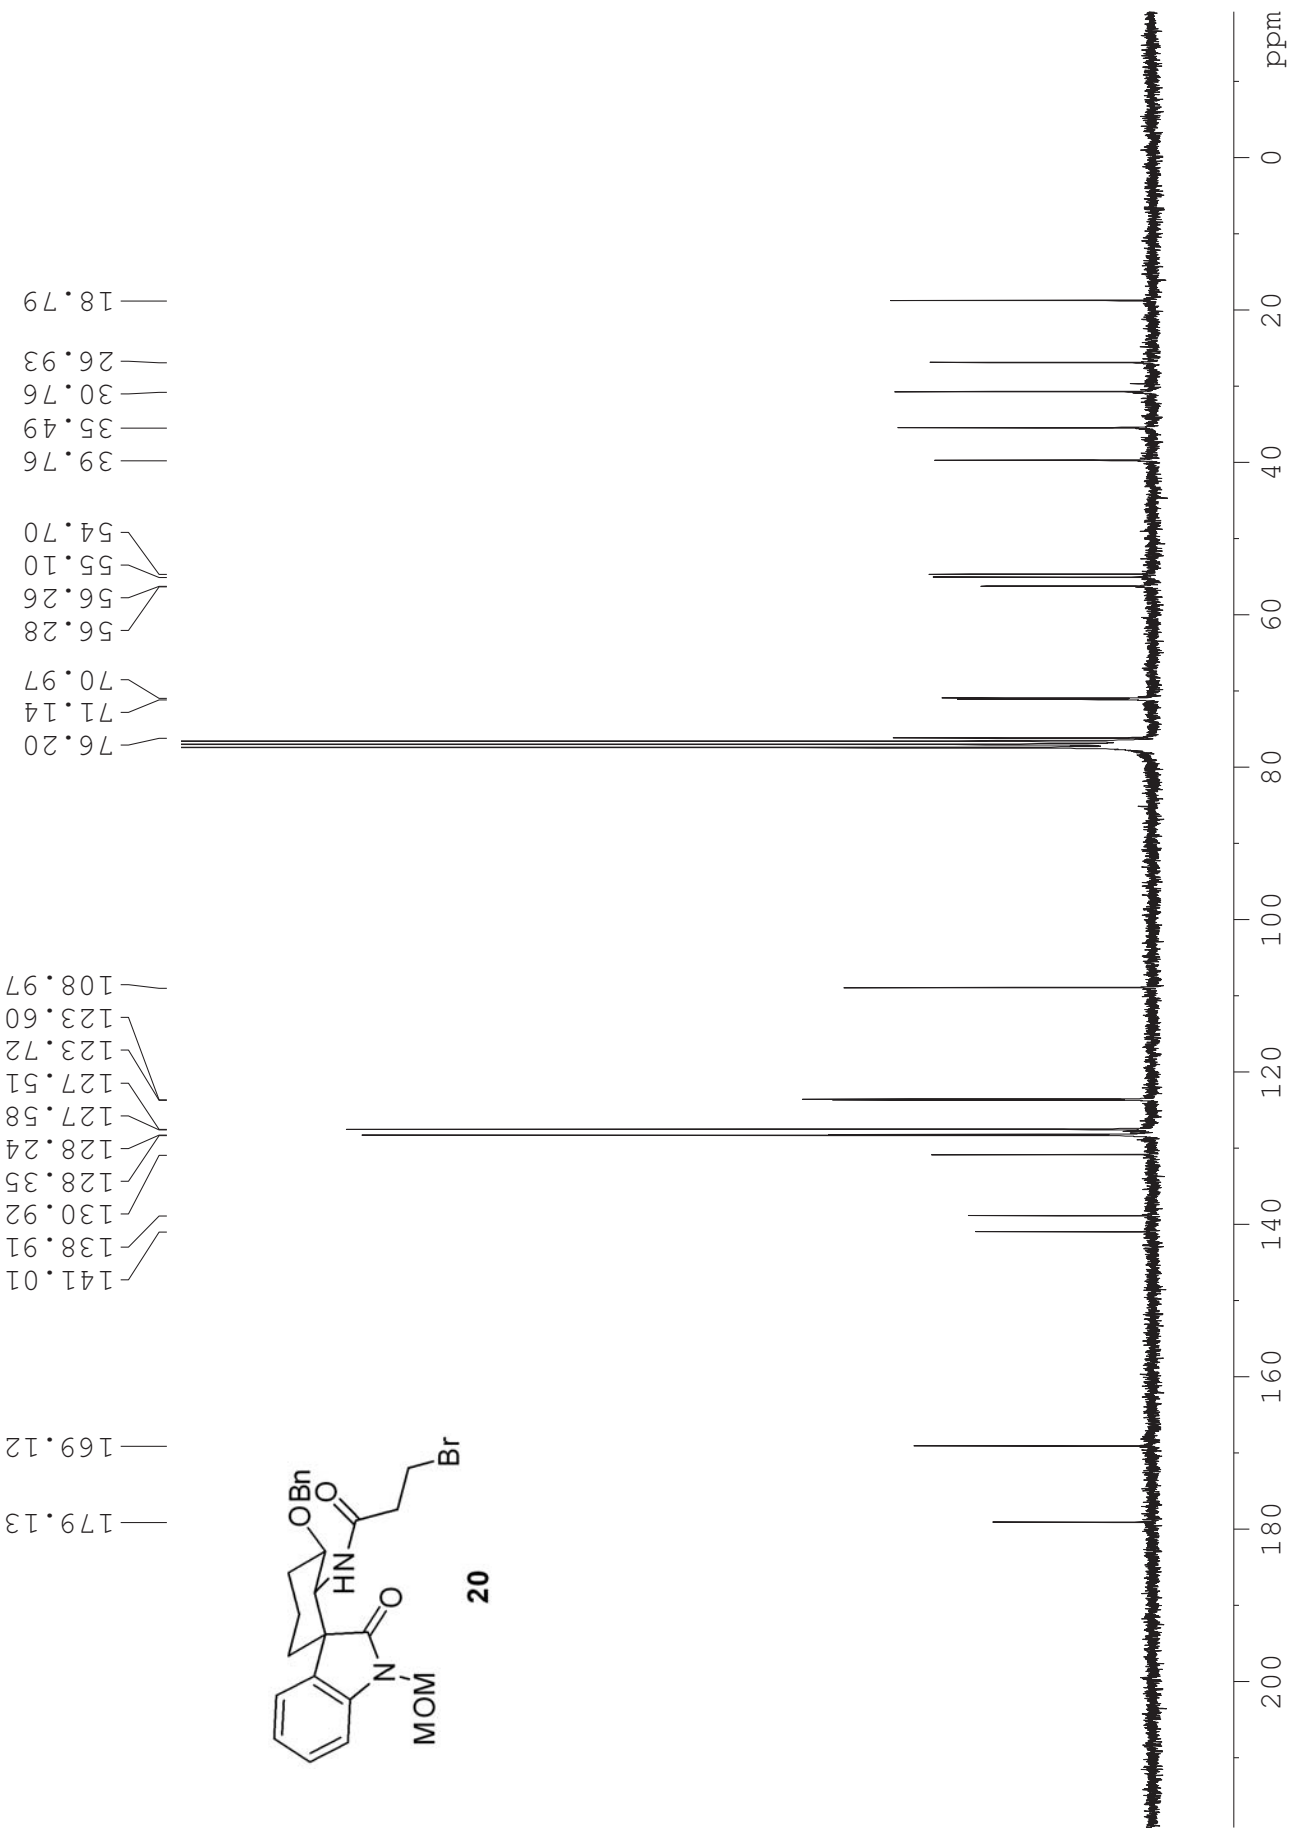

ch12-055-2 301a

7.371  
7.347  
7.327  
7.323  
7.313  
7.301  
7.298  
7.084  
7.060  
7.034  
6.018  
5.986  
5.163  
5.143  
5.127  
5.109  
5.073  
4.579  
4.565  
4.545  
4.532  
4.505  
4.481  
4.442  
4.013  
3.999  
3.985  
3.971  
3.526  
3.503  
3.480  
3.334  
2.709  
2.692  
2.687  
2.668  
2.645  
2.162  
2.154  
2.141  
1.994  
1.981  
1.948  
1.934  
1.927  
1.910  
1.895  
1.879  
1.866  
1.837  
1.805  
1.679  
1.667  
1.657  
1.613

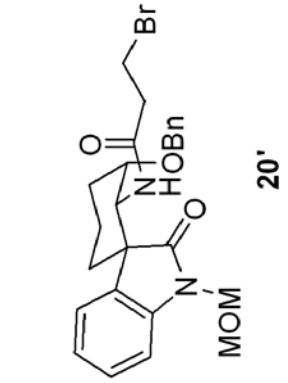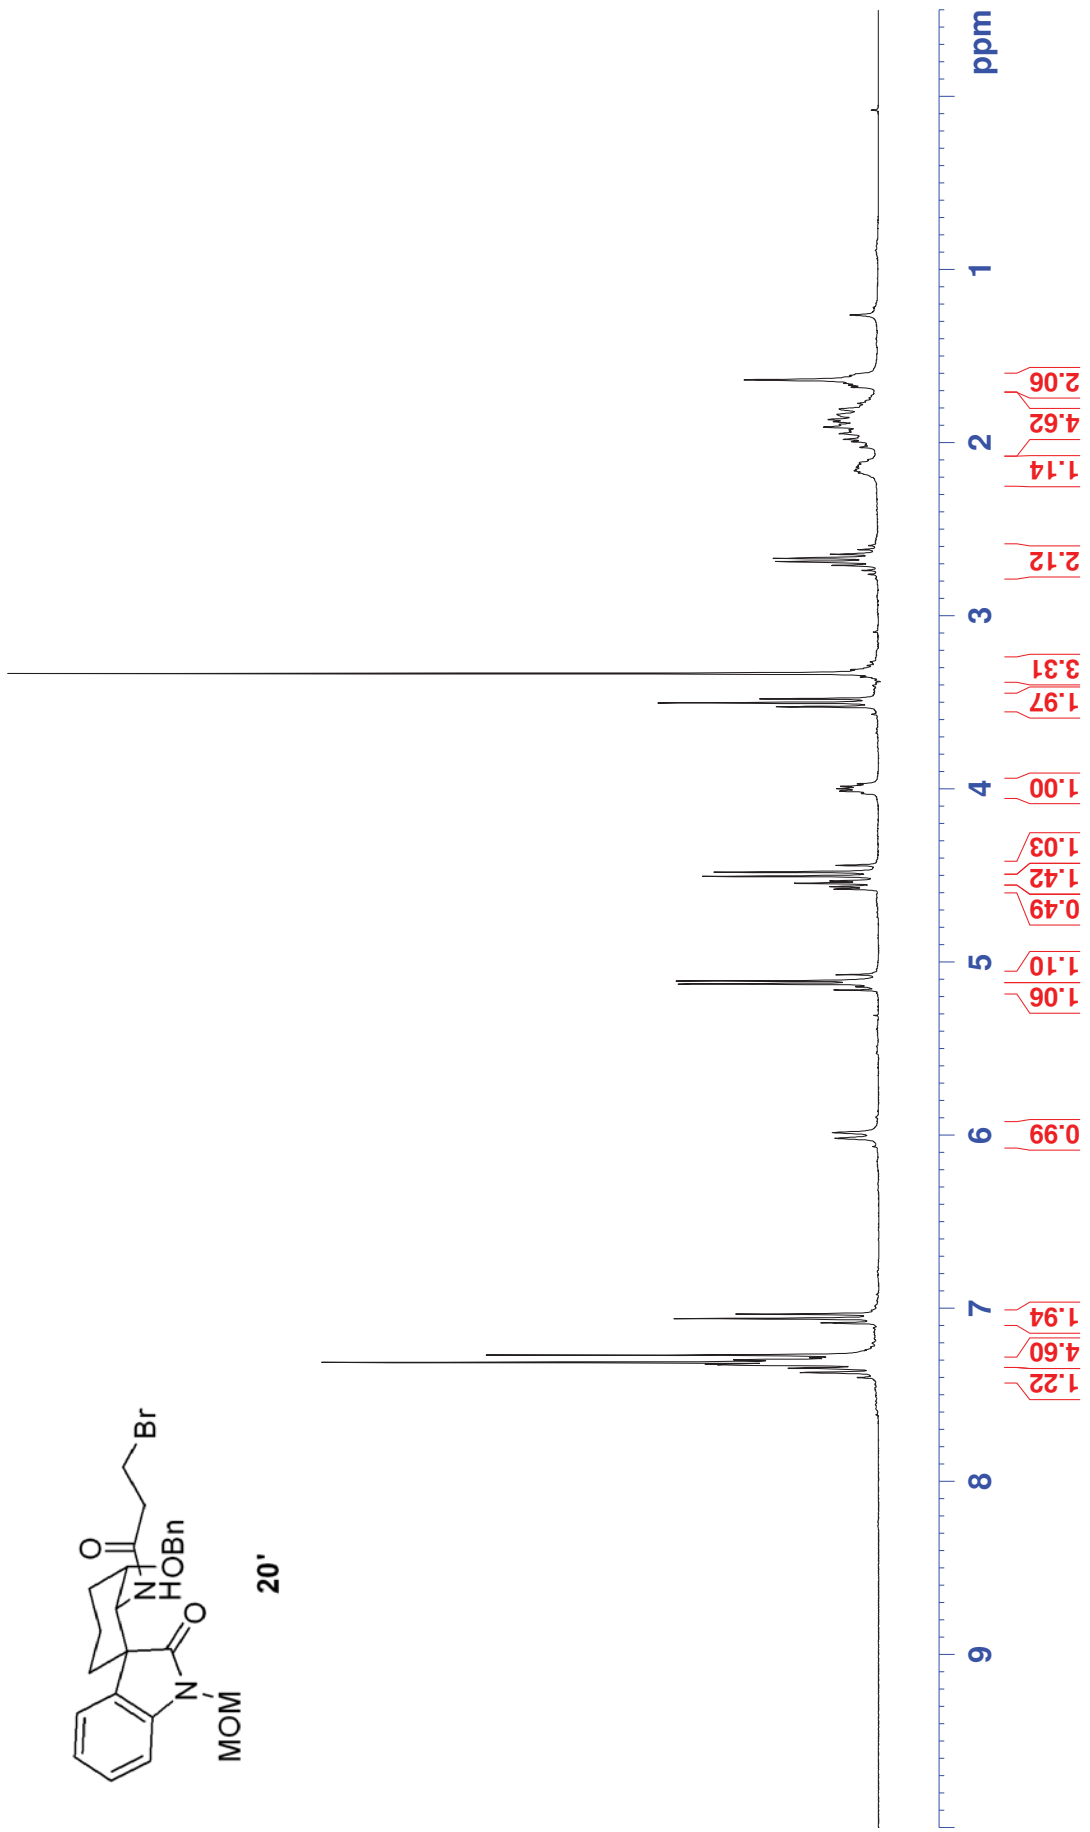

ch12-055-2 C13 301

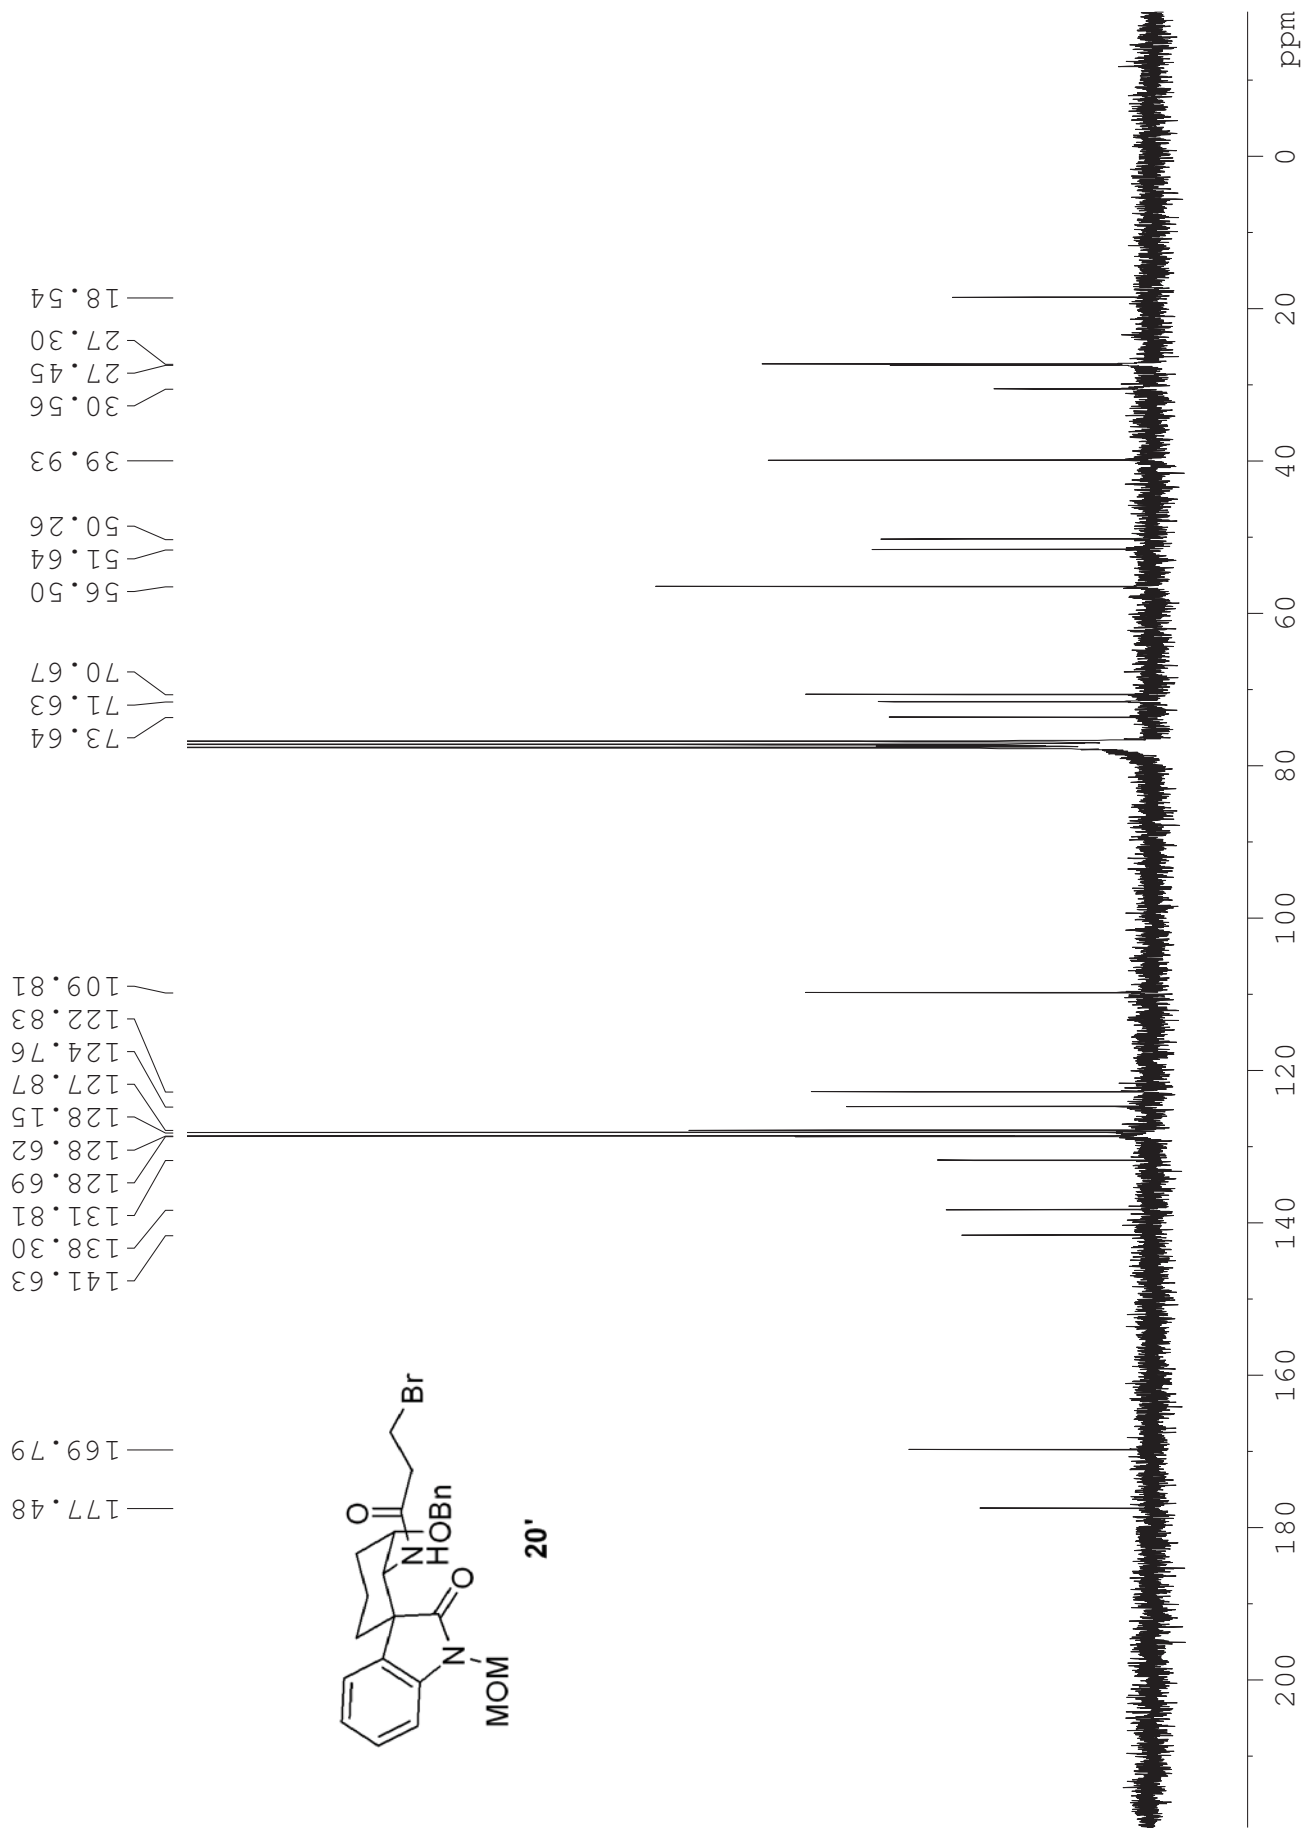

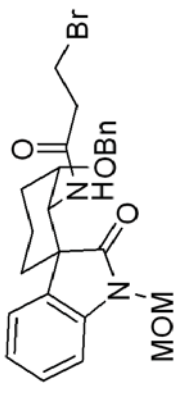

ch12-055-2 NOESY 400b

20'

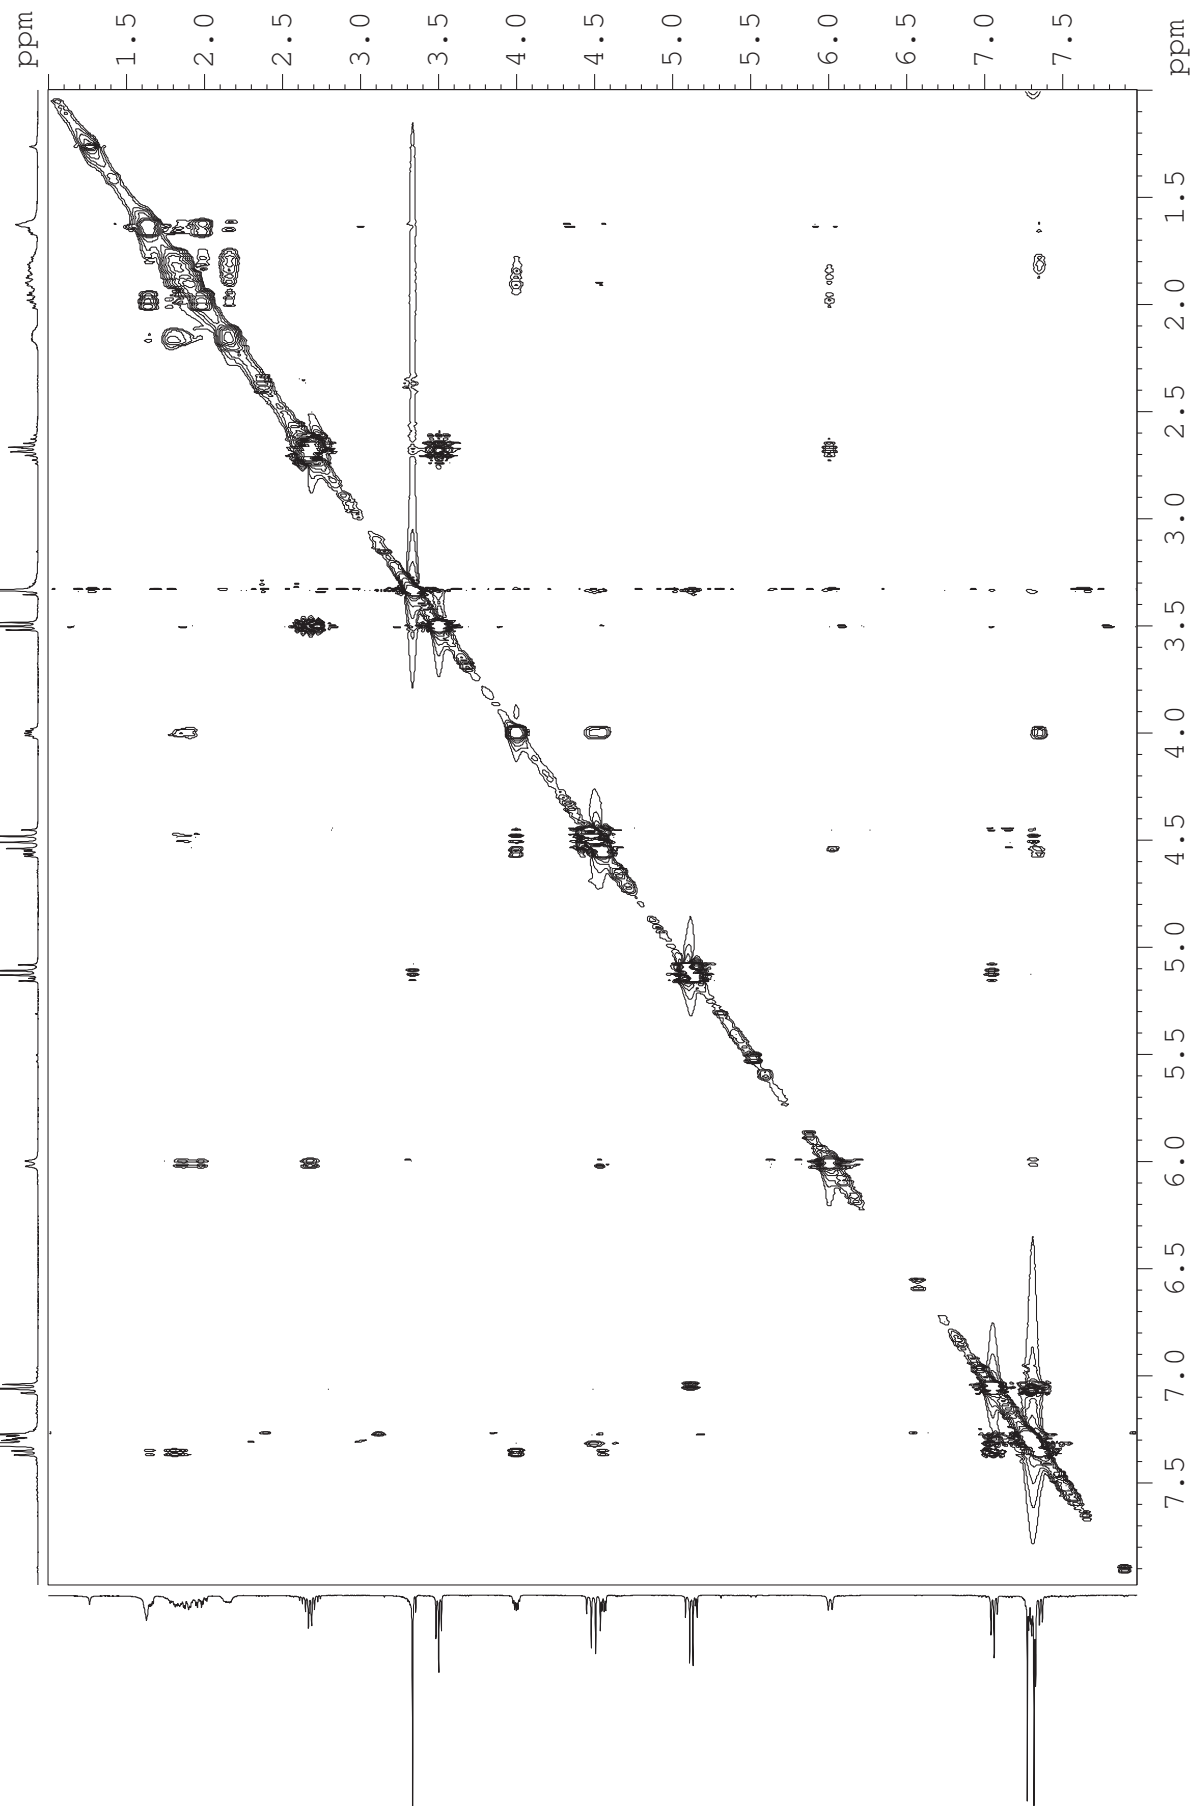

ch12-081 301b

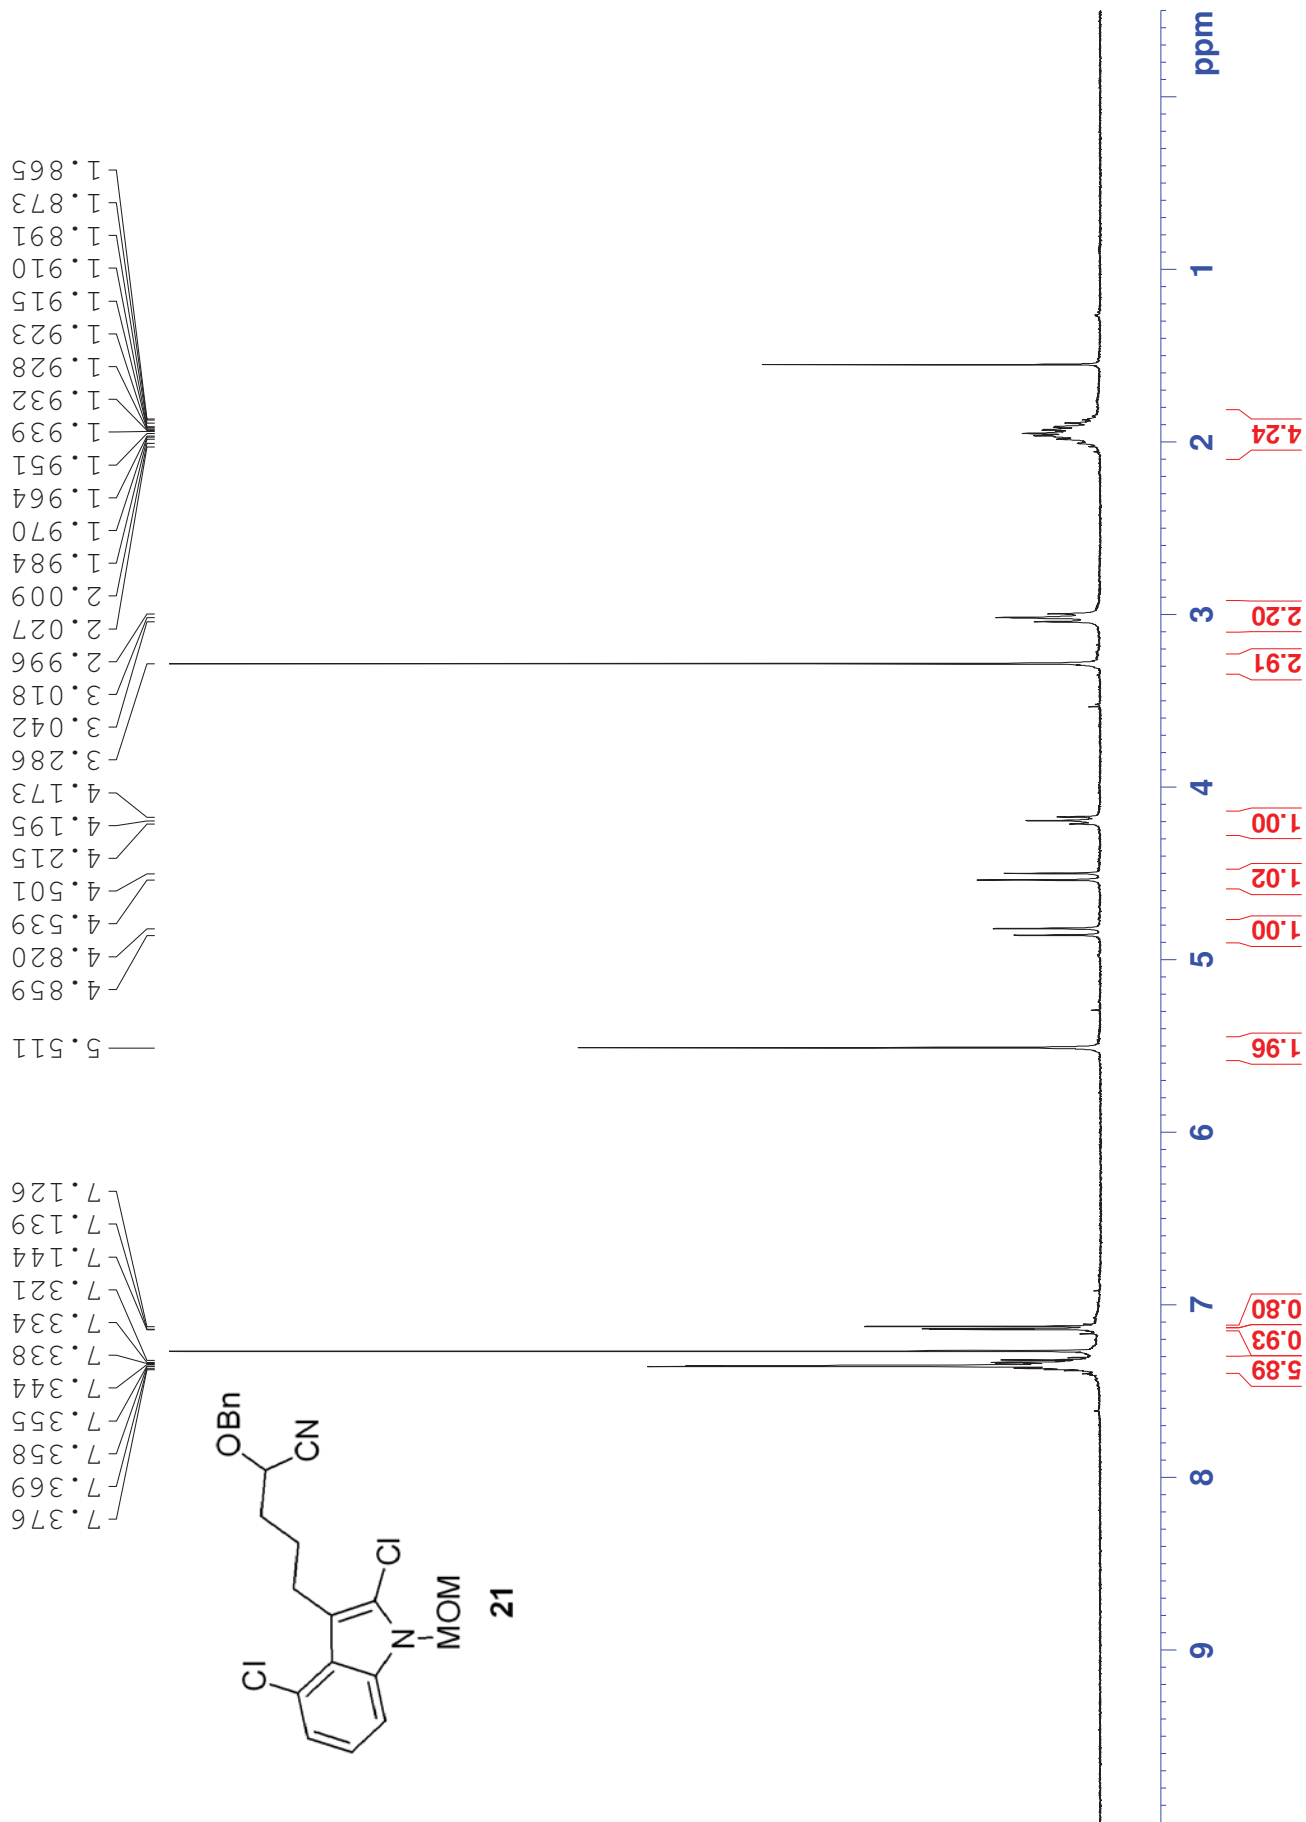

ch12-081 C13 300

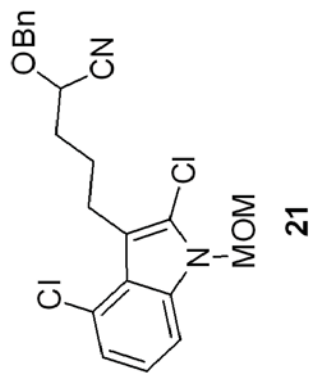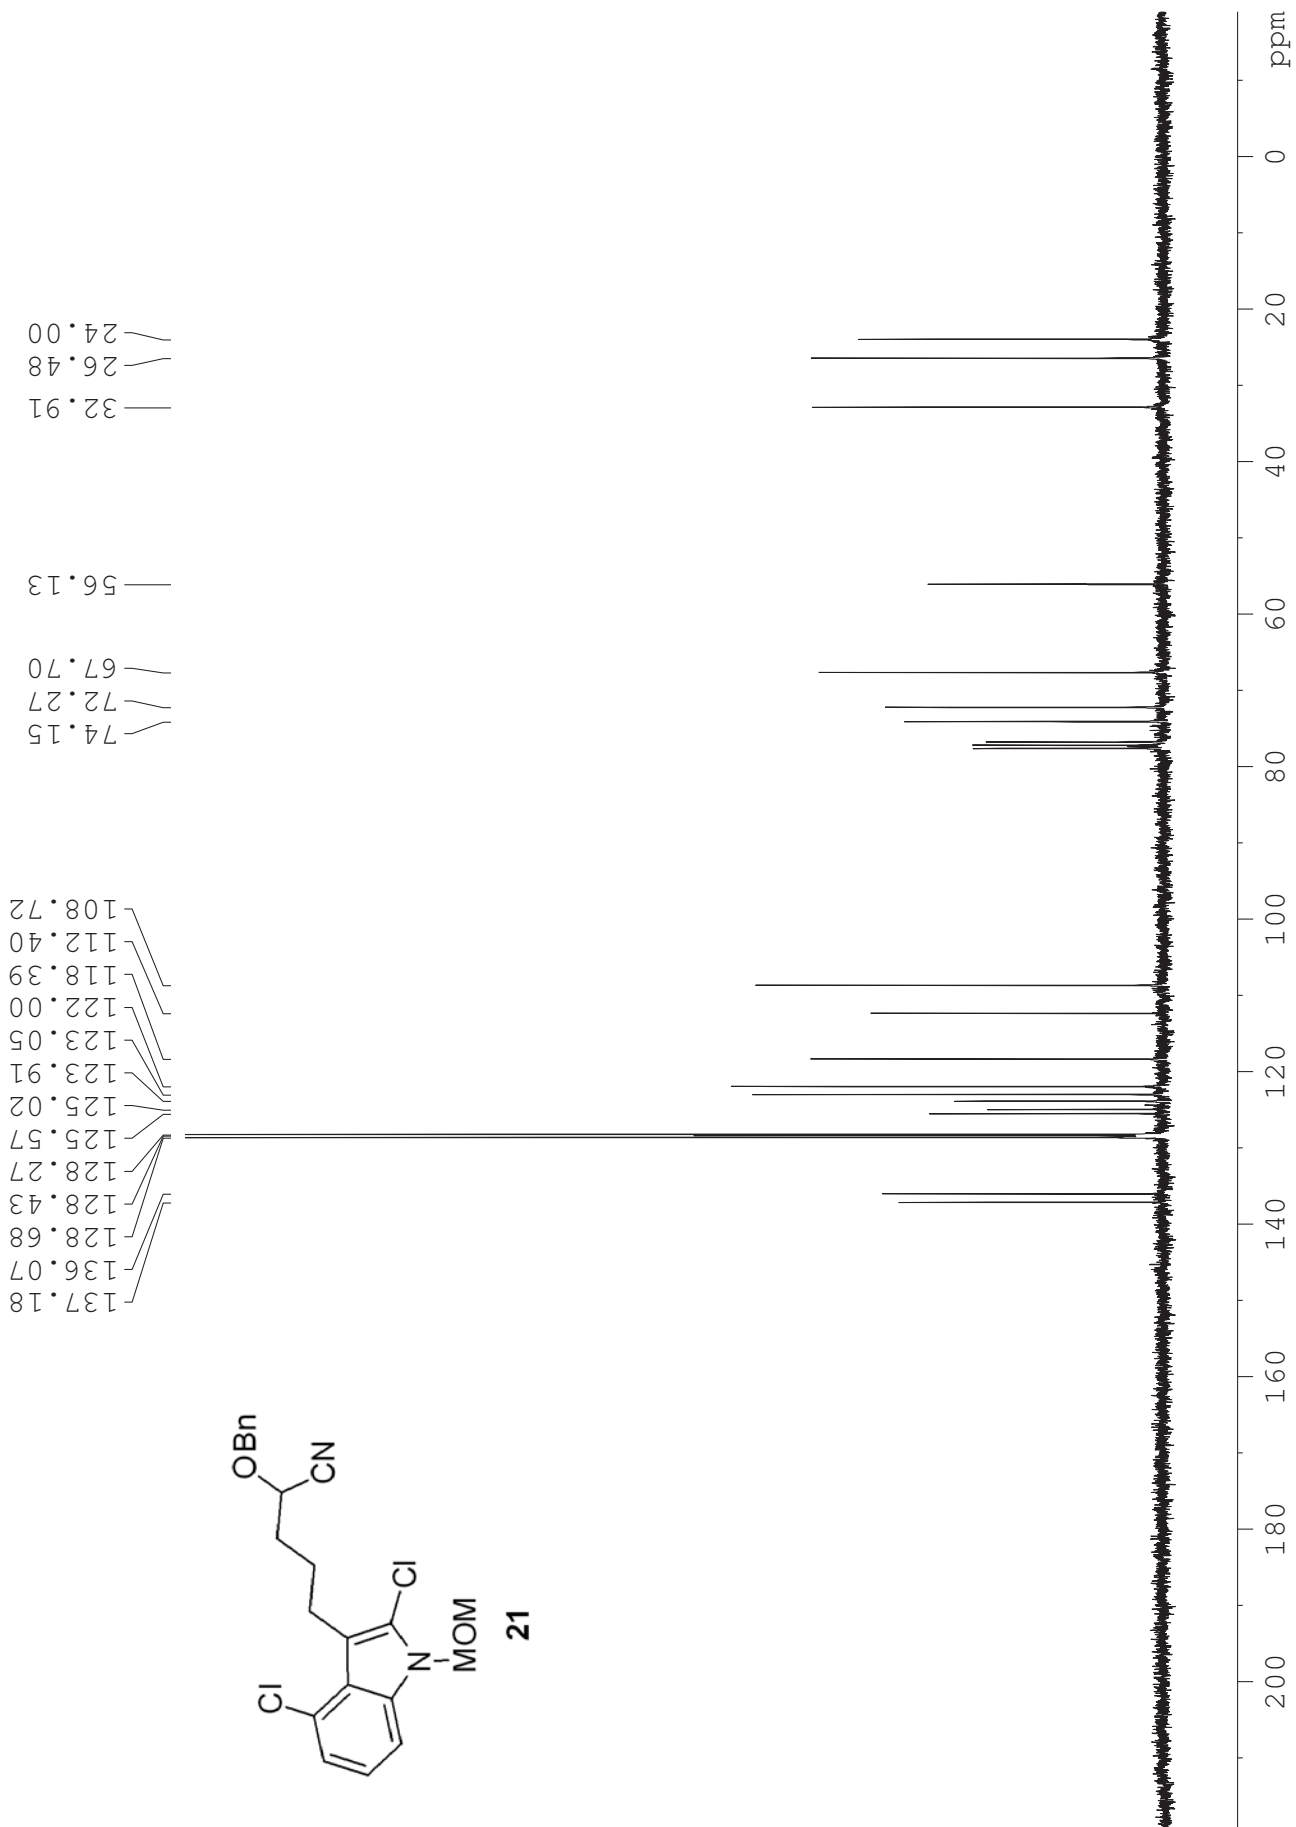



ch12-082-1 300

7.302  
7.278  
7.222  
7.196  
7.175  
7.170  
7.160  
7.152  
7.143  
7.110  
7.108  
7.083  
7.081  
6.992  
6.987  
6.966  
6.854  
6.852  
6.829  
5.242  
5.210  
5.177  
5.078  
5.042  
5.020  
4.984  
4.897  
4.866  
4.708  
4.668  
4.464  
4.424  
4.154  
4.141  
3.261  
2.672  
2.657  
2.650  
2.623  
2.596  
2.186  
2.173  
2.162  
2.138  
2.128  
2.113  
2.085  
2.075  
2.065  
2.048  
2.021  
1.750  
1.707  
1.682  
1.636

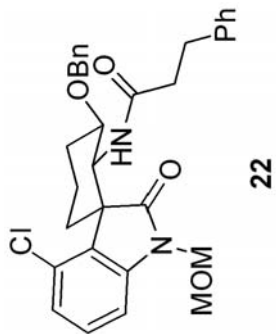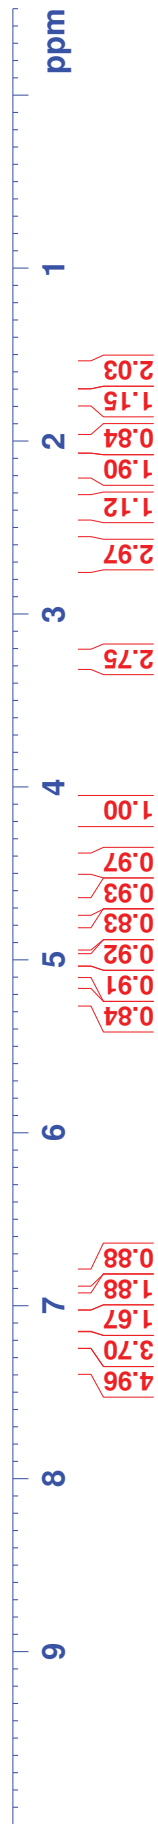

ch12-082-1 C13 300

178.60  
172.02

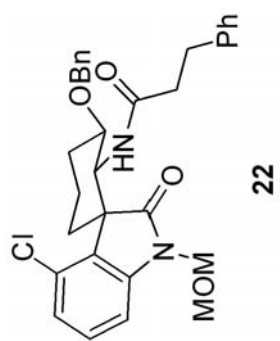

142.98  
141.16  
139.05  
131.98  
129.72  
128.59  
128.51  
128.24  
127.78  
127.66  
126.69  
126.16  
125.42  
107.77

76.64  
71.25  
70.88

56.45  
56.35  
52.28

38.35  
31.43  
30.52  
29.96  
18.66

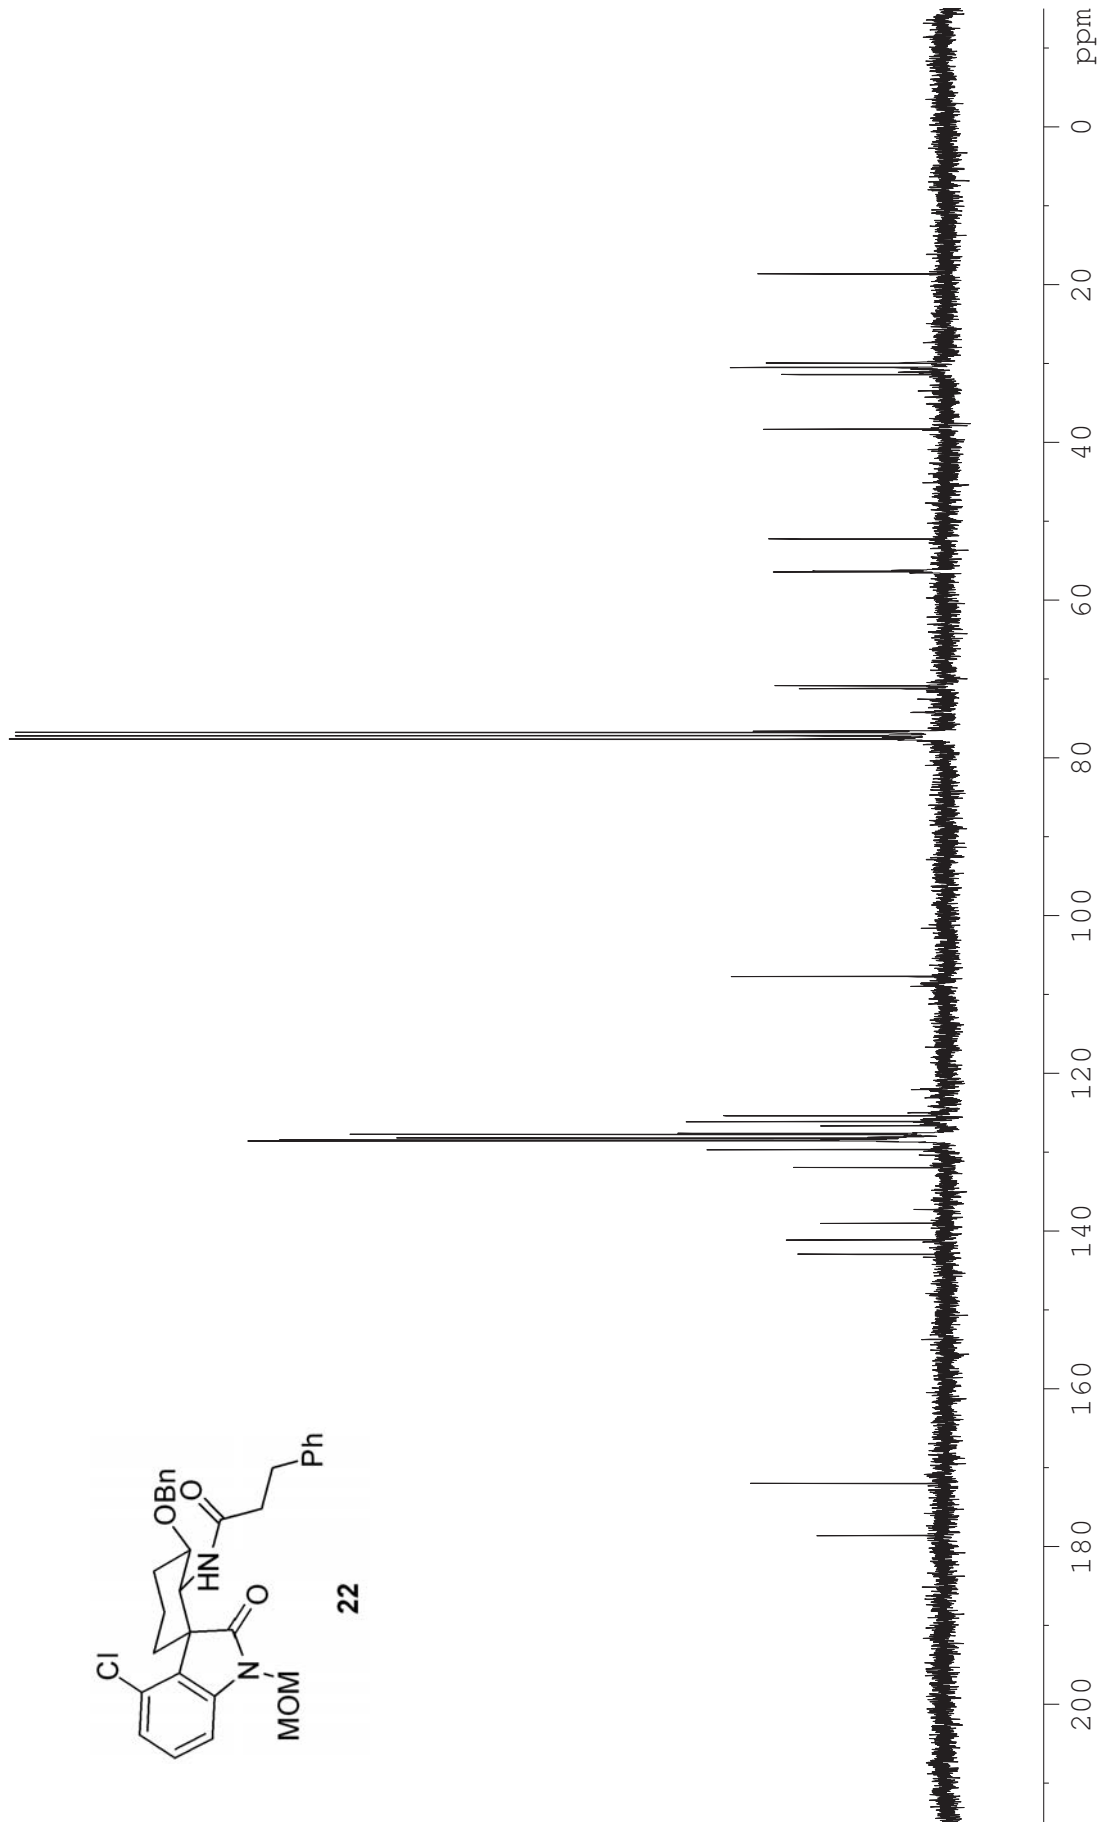

ch12-073 301a

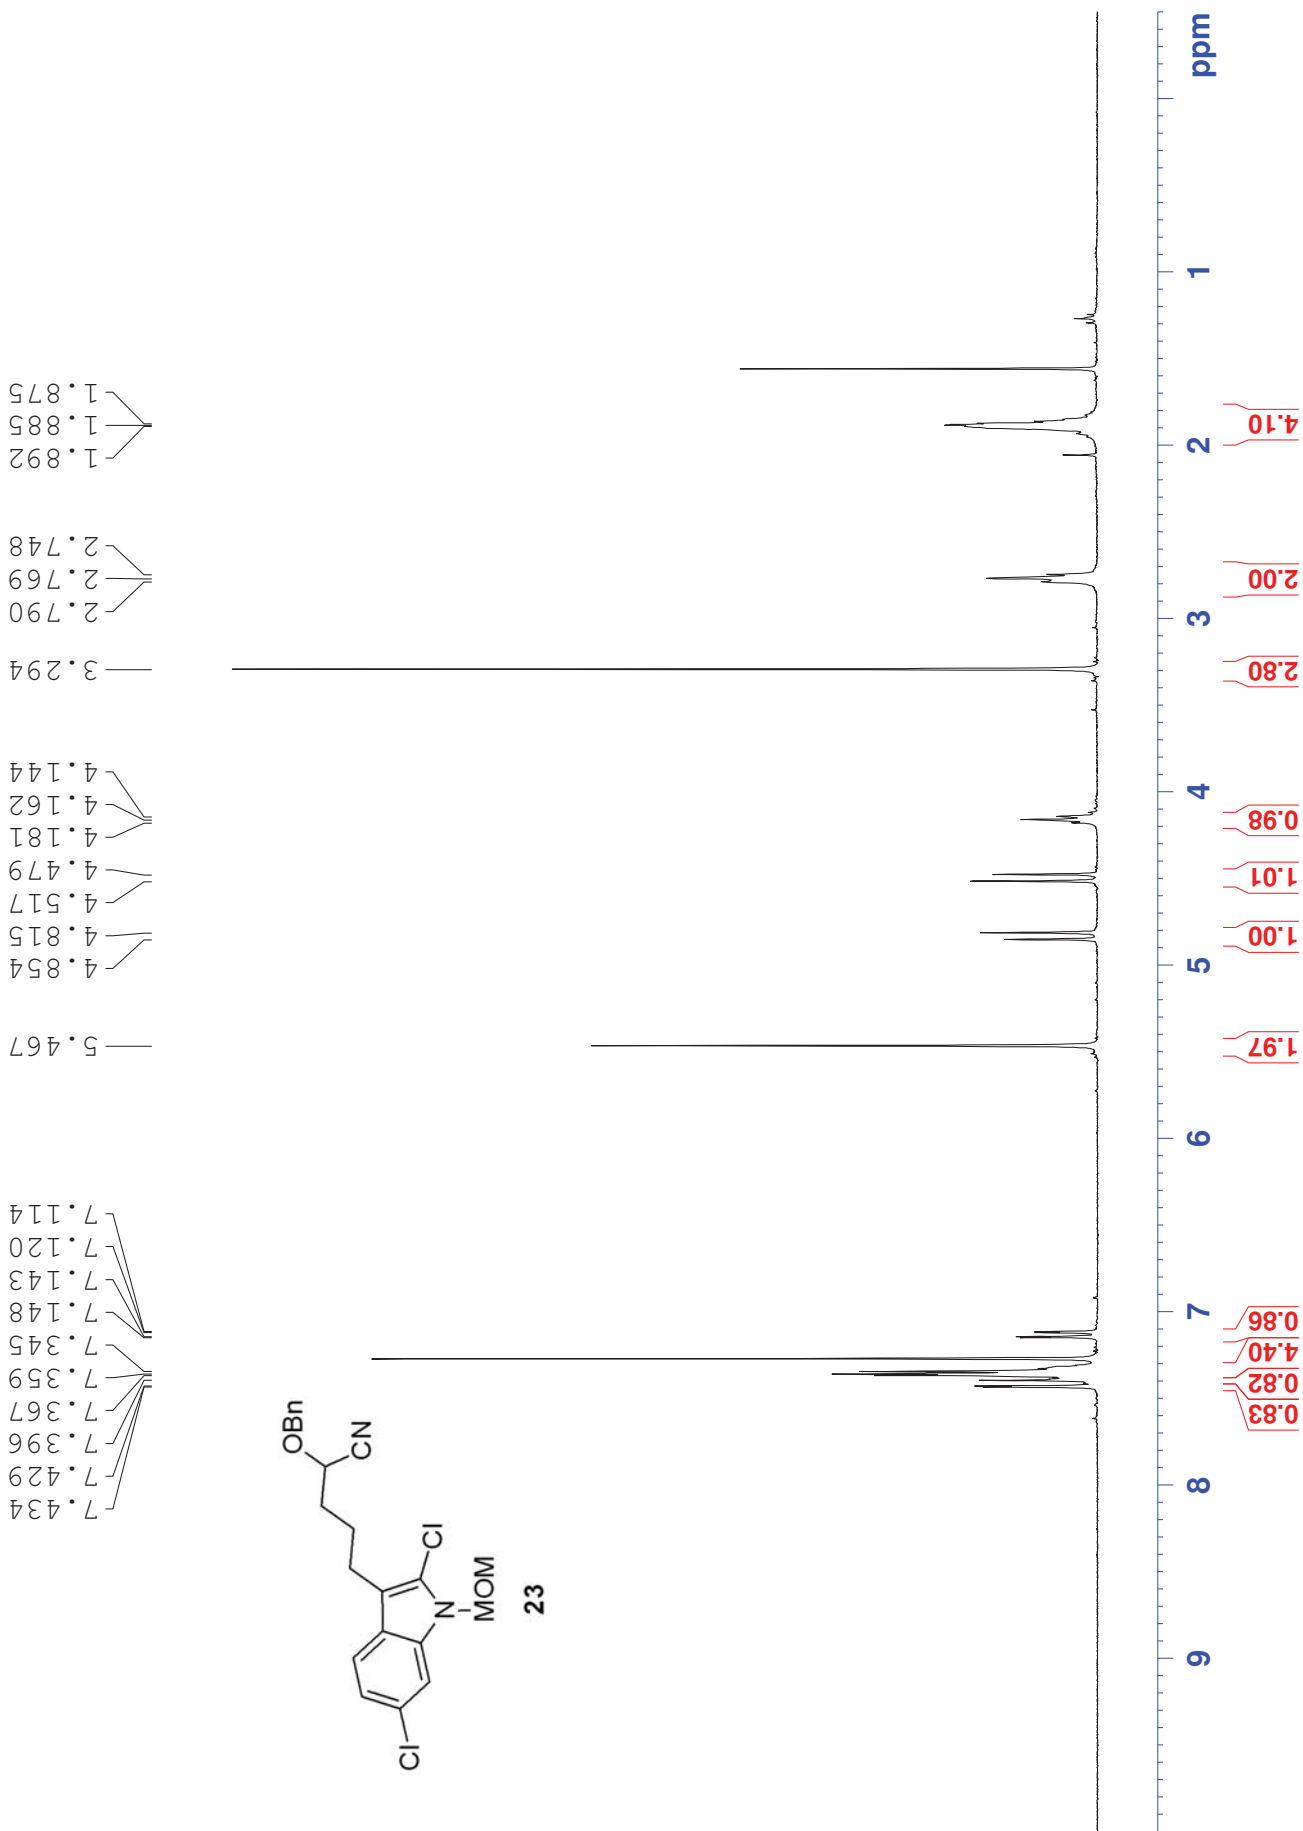

chl2-073 repurify C13 301b

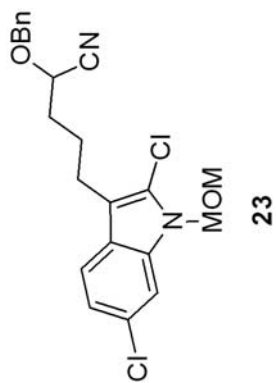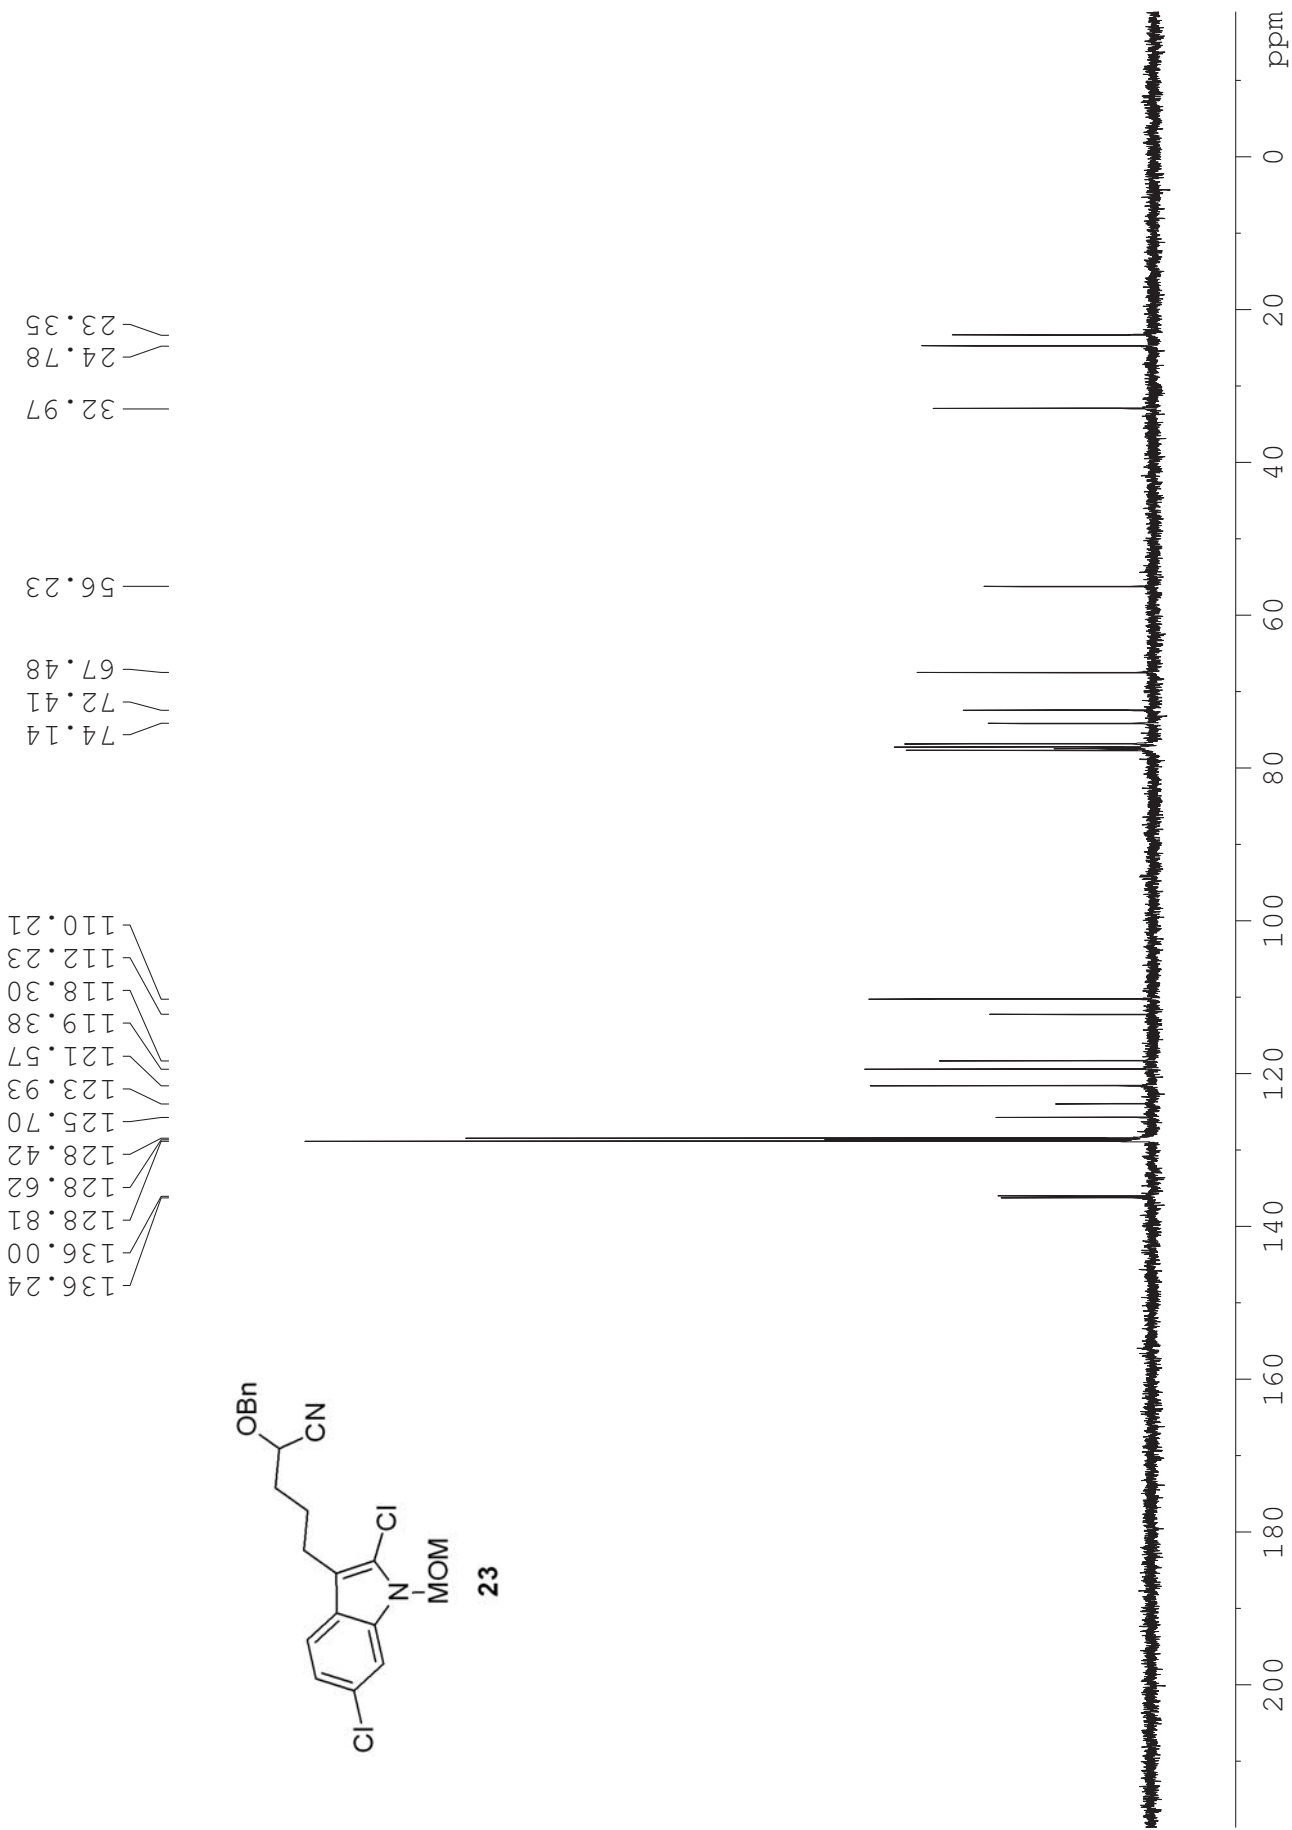

ch12-078-1 300

7.348  
7.322  
7.306  
7.293  
7.279  
7.263  
7.218  
7.198  
7.174  
7.165  
7.149  
7.139  
7.133  
7.112  
7.106  
6.951  
6.945  
6.934  
6.928  
5.010  
4.968  
4.936  
4.695  
4.655  
4.616  
4.583  
4.550  
4.458  
4.418  
4.175  
4.161  
3.240  
2.663  
2.646  
2.637  
2.619  
2.610  
2.597  
2.188  
2.166  
2.161  
2.138  
2.090  
2.064  
2.037  
2.014  
1.861  
1.849  
1.805  
1.772  
1.736  
1.723  
1.670  
1.581  
1.533

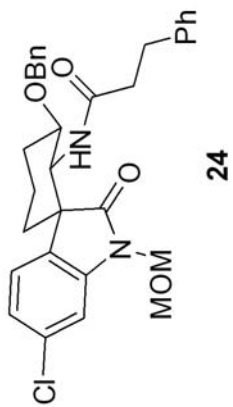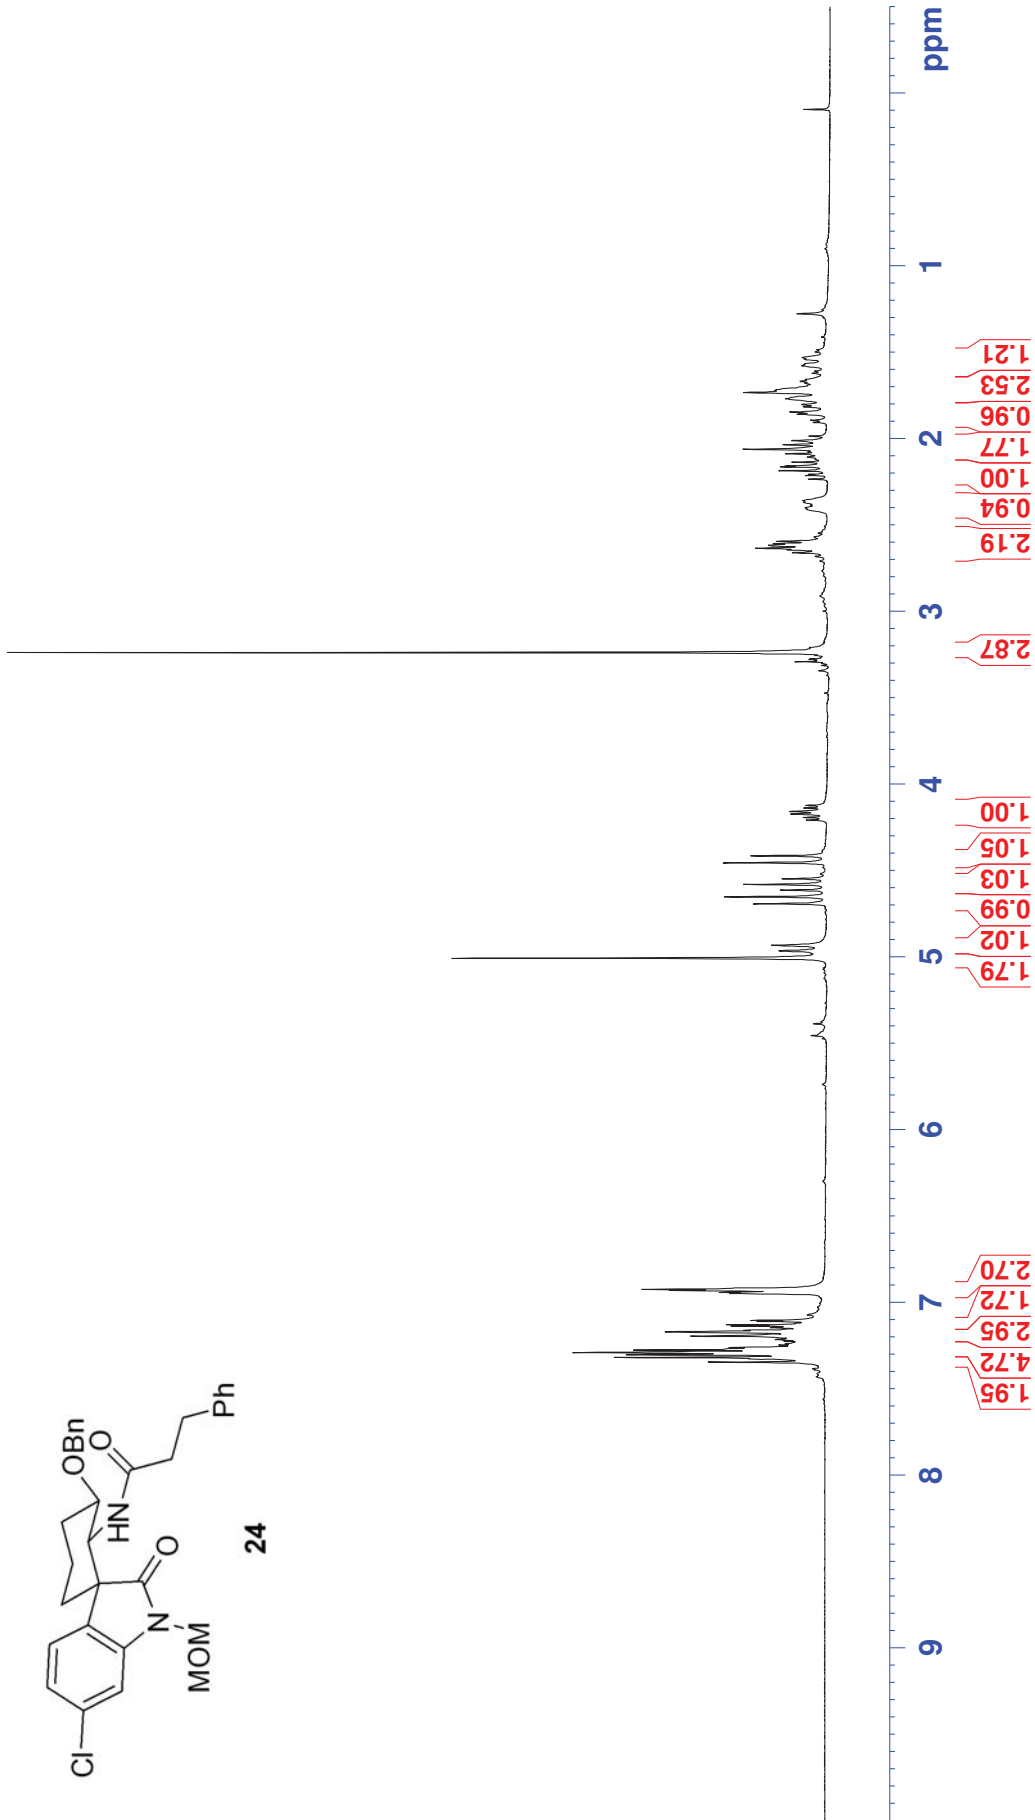

ch12-078-1 C13 300

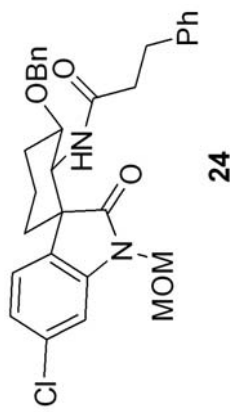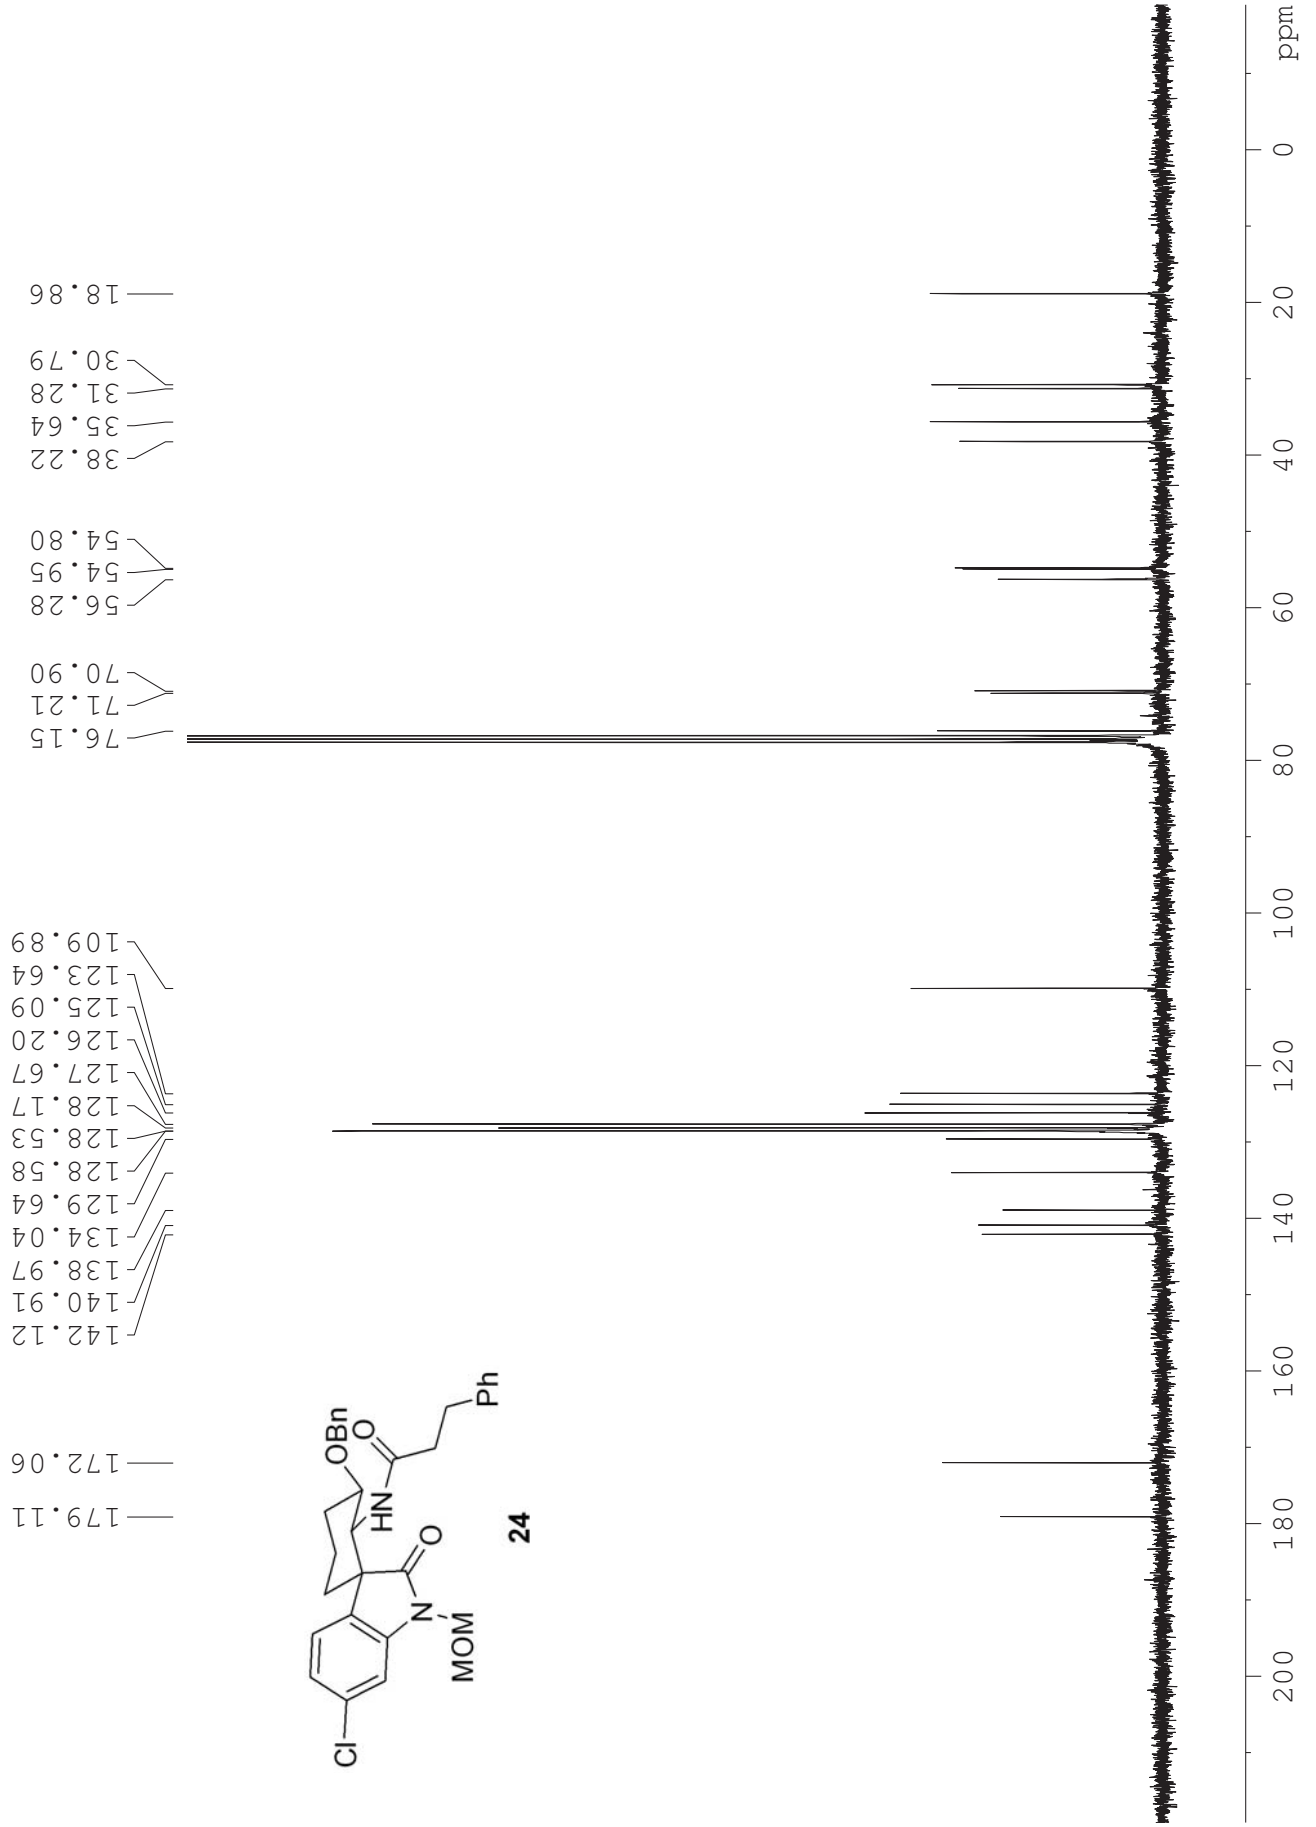

ch12-140 400b

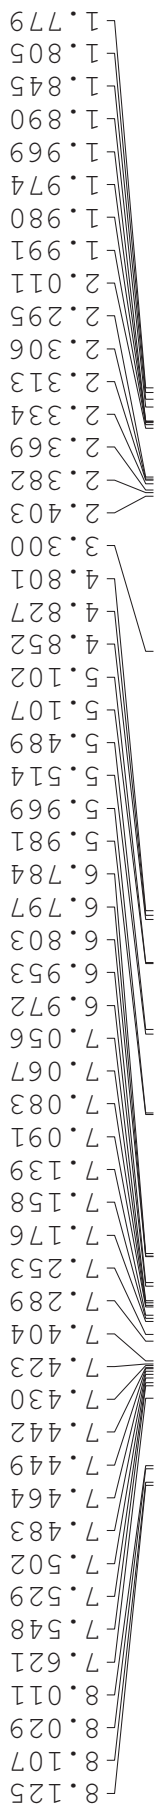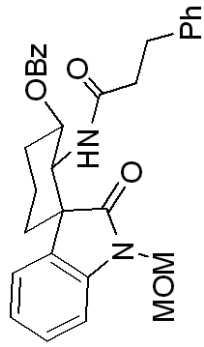

29

ch12-140 C13 400a

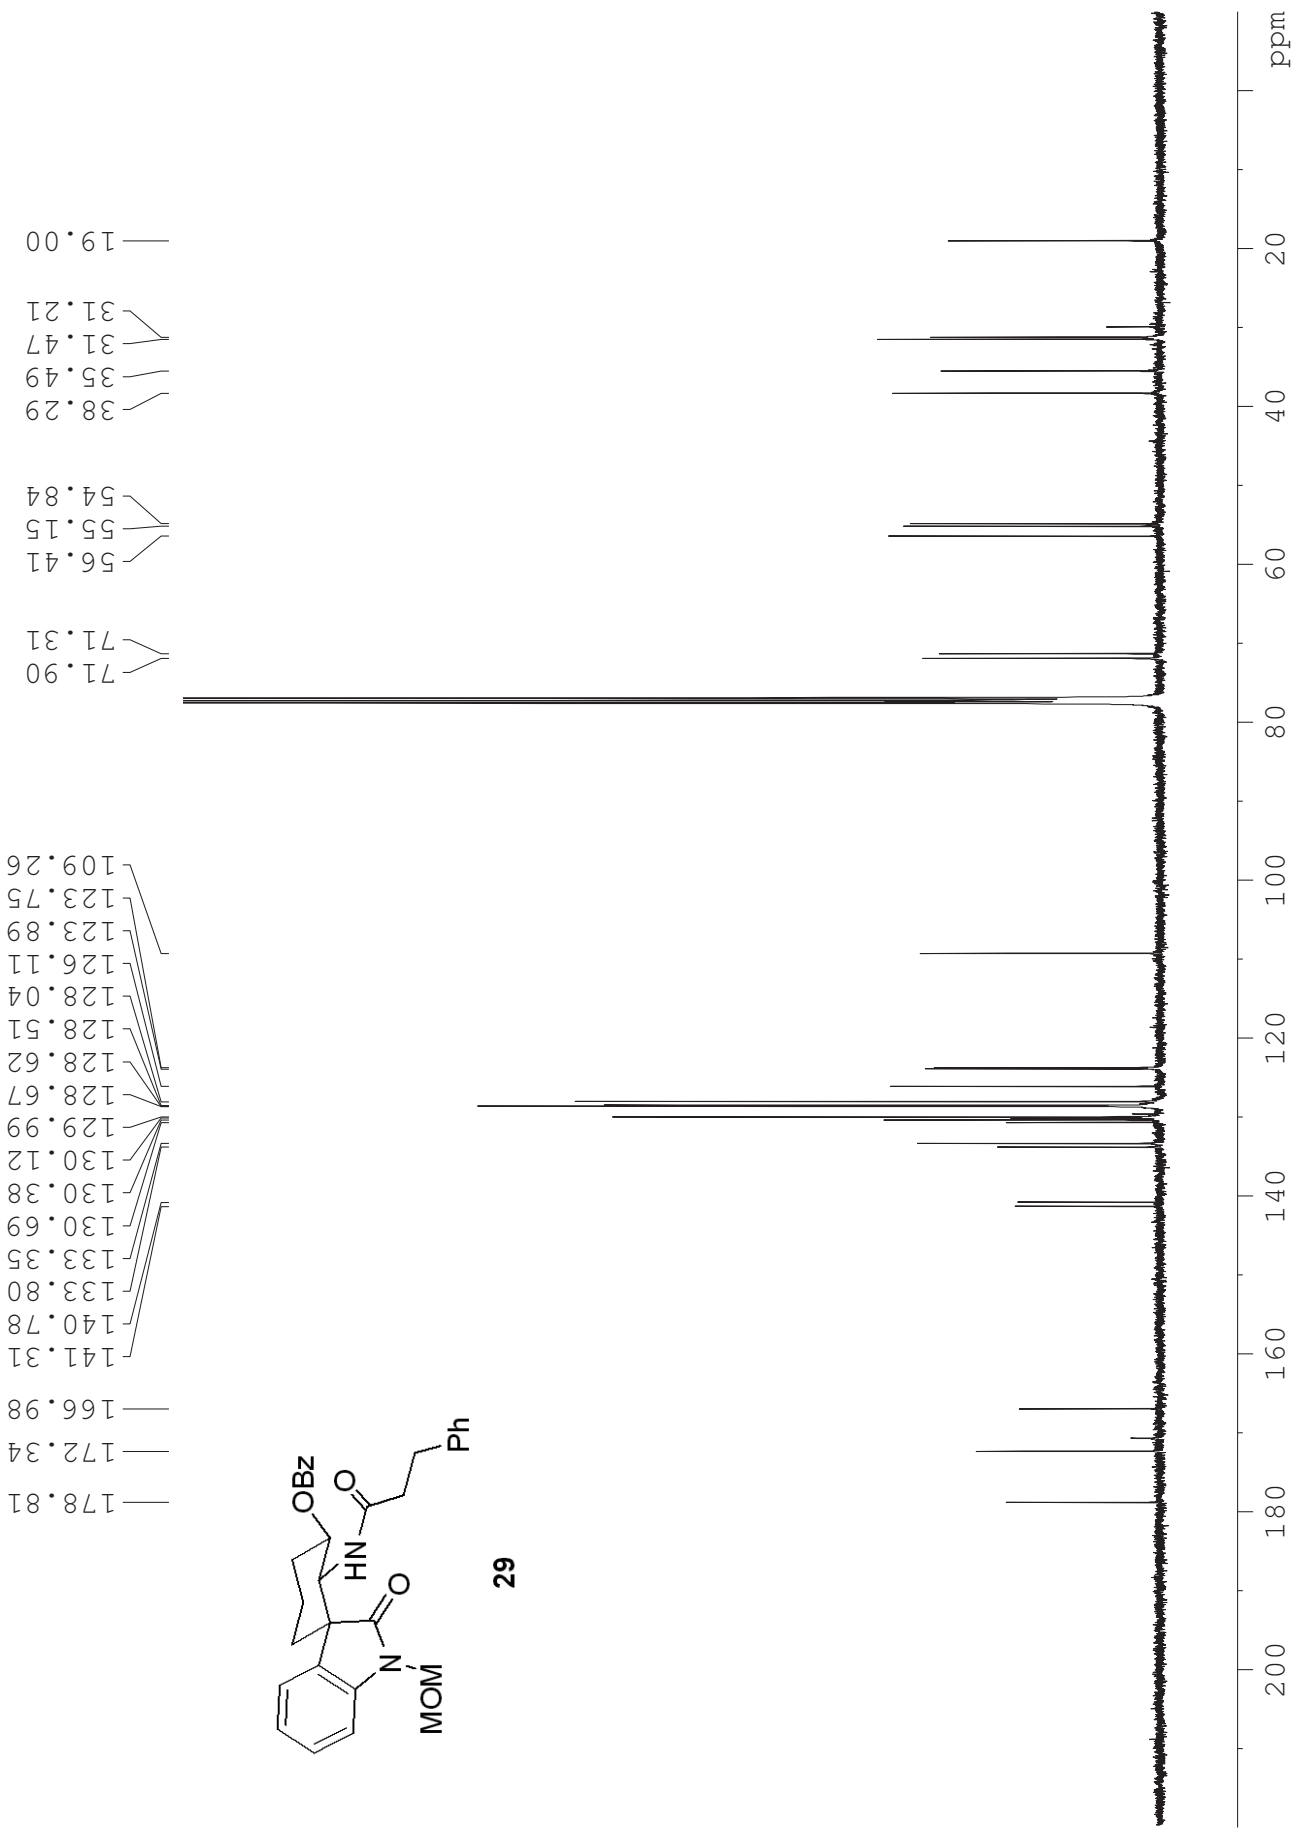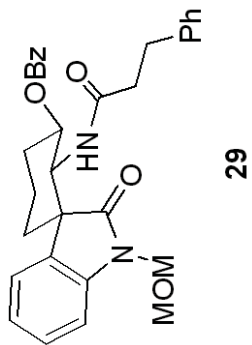



ch12-140 NOESY 400A

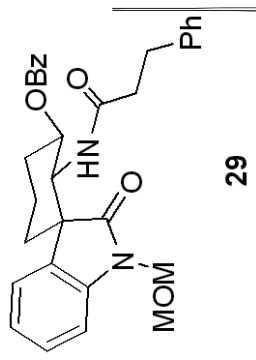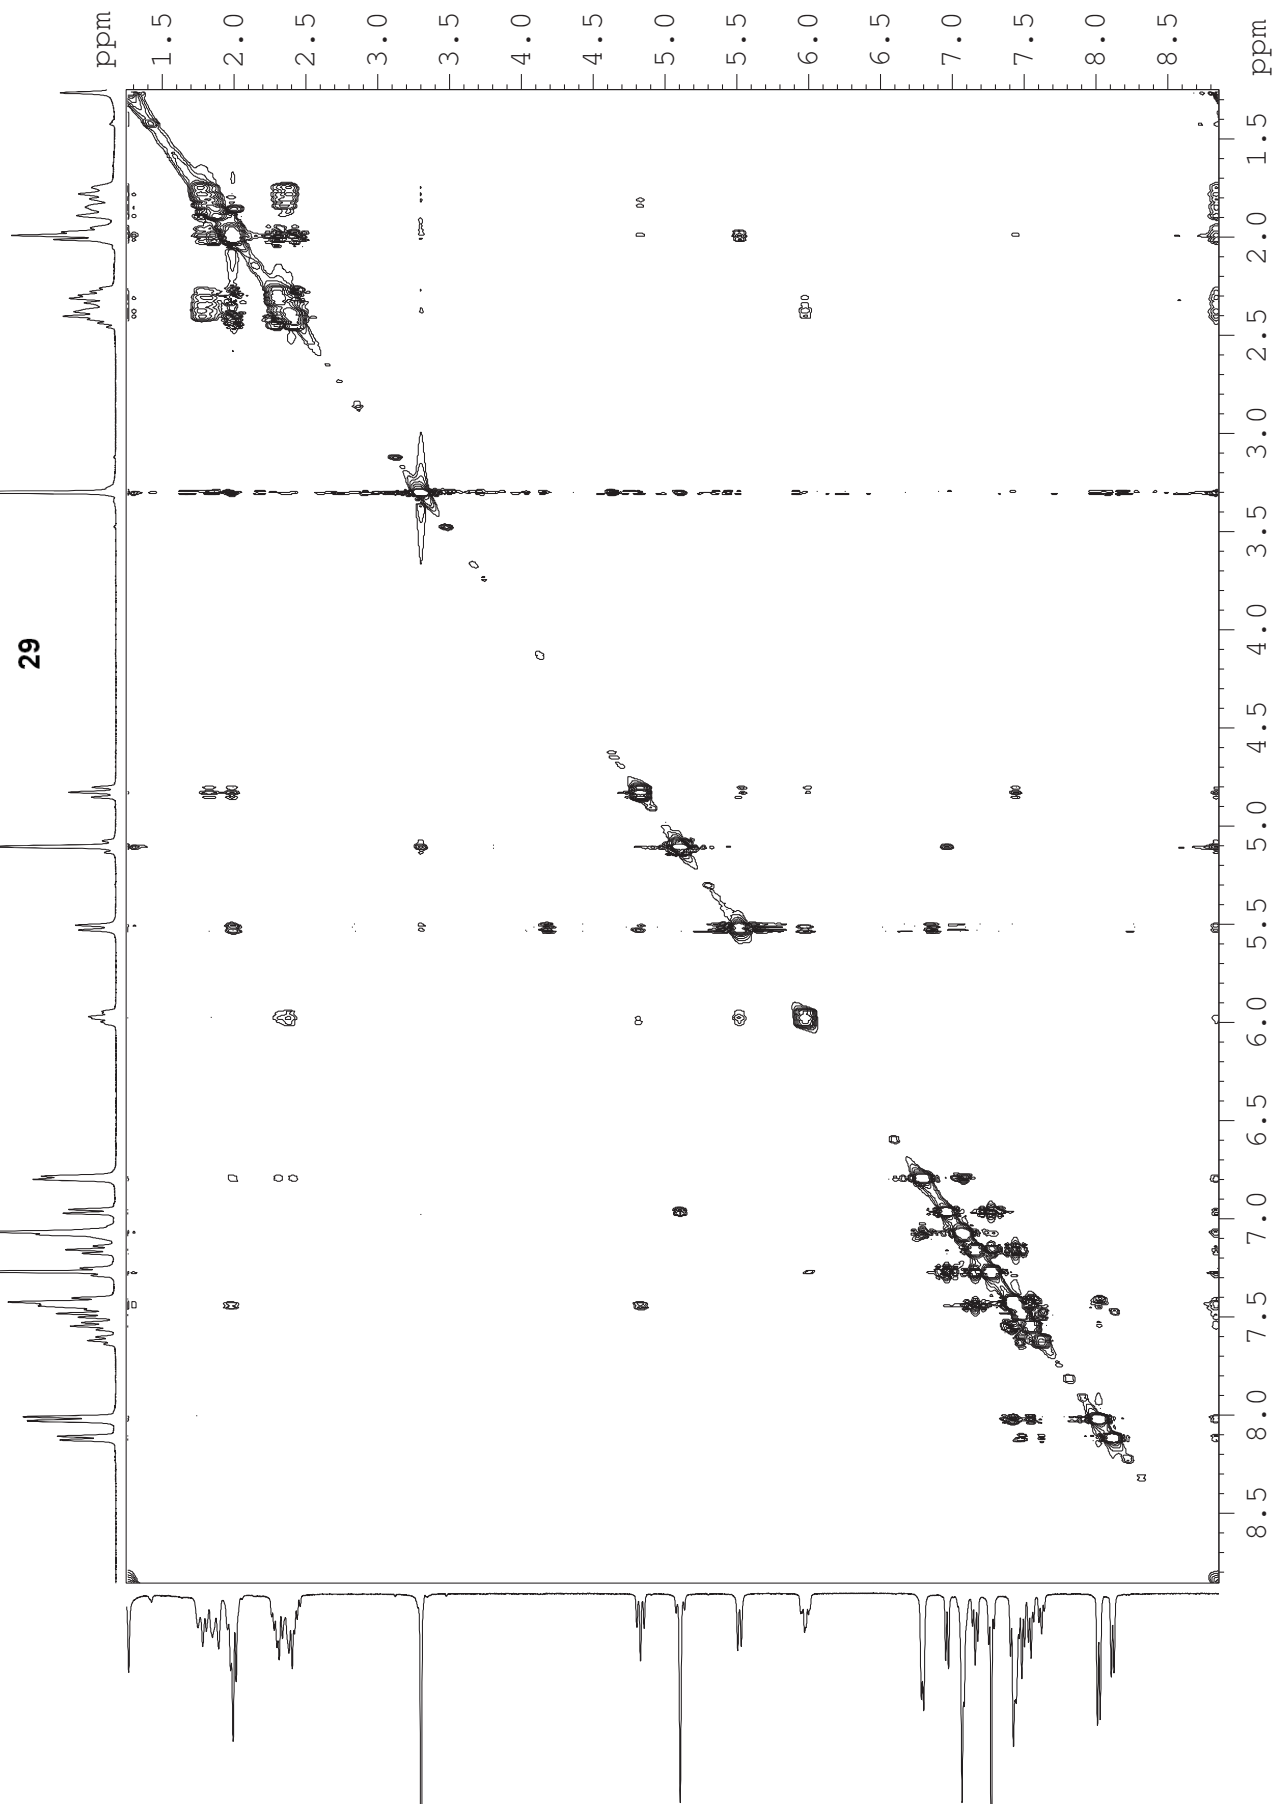

ch12-142 400A

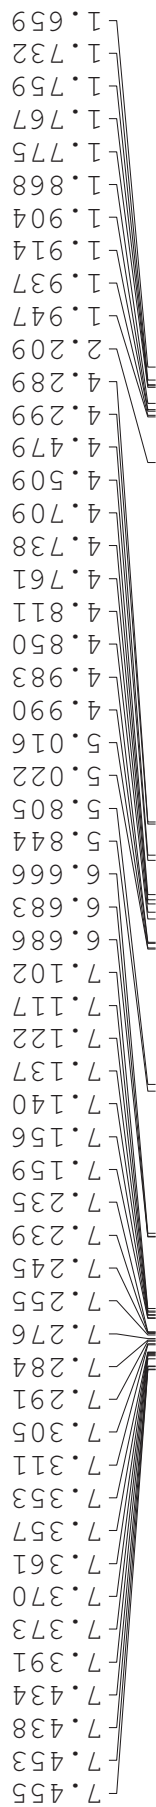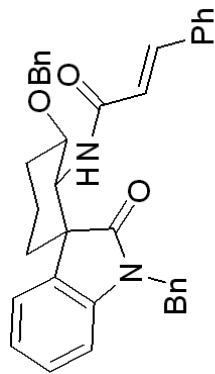

30

ch12-142 C13 300

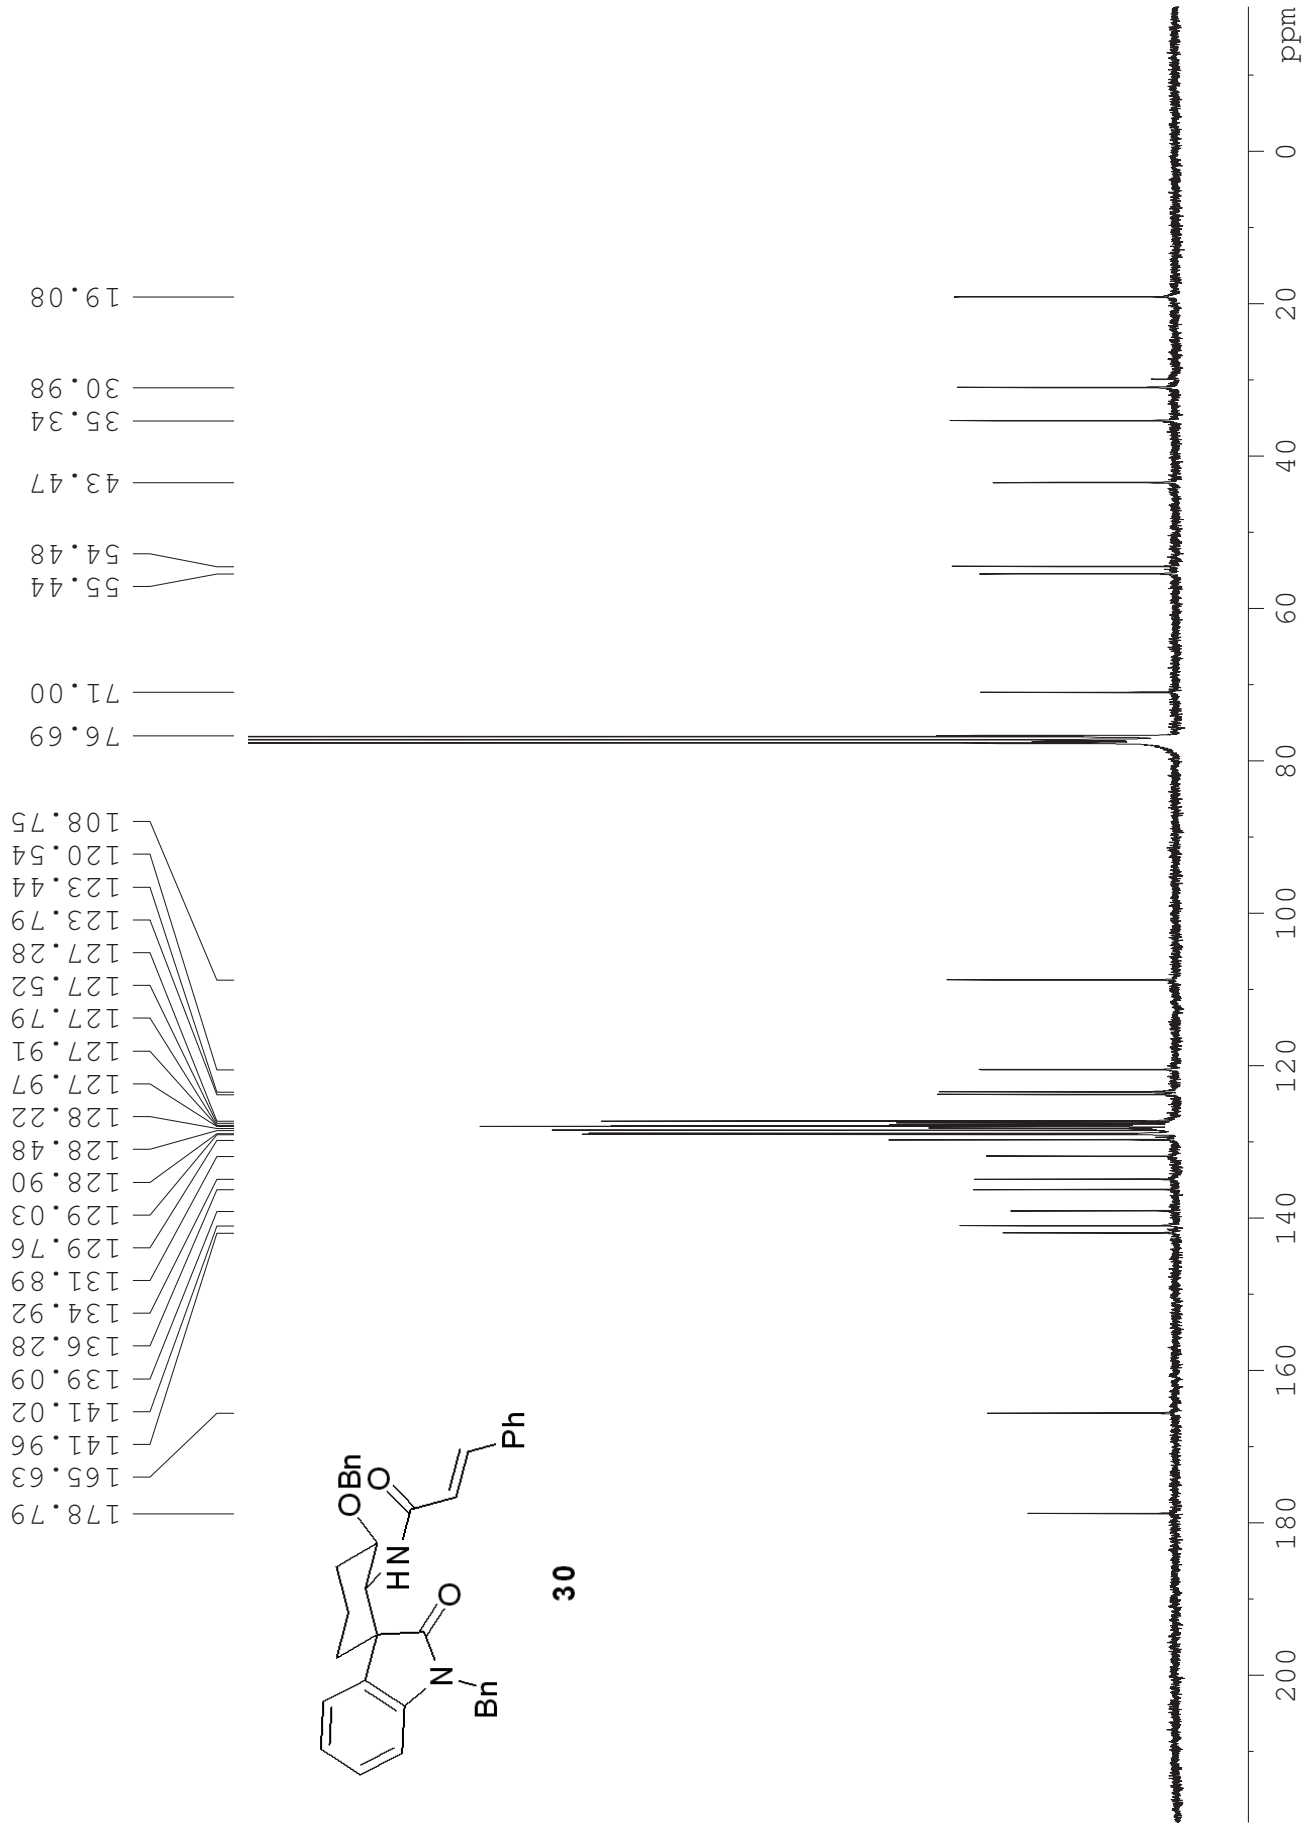

30

ch12-136 400a

7.375  
7.356  
7.318  
7.310  
7.303  
7.293  
7.289  
7.269  
7.257  
7.251  
7.245  
7.243  
7.225  
7.224  
7.206  
7.205  
7.126  
7.108  
6.942  
6.923  
5.258  
5.234  
5.100  
5.095  
4.716  
4.686  
4.607  
4.582  
4.557  
4.502  
4.472  
3.325  
2.406  
2.394  
2.378  
2.373  
2.358  
2.296  
2.278  
2.259  
2.103  
2.083  
2.067  
2.063  
1.989  
1.986  
1.969  
1.796  
1.494  
1.476  
1.458  
1.439  
0.925  
0.906  
0.888

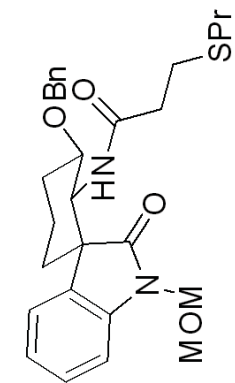

31

884

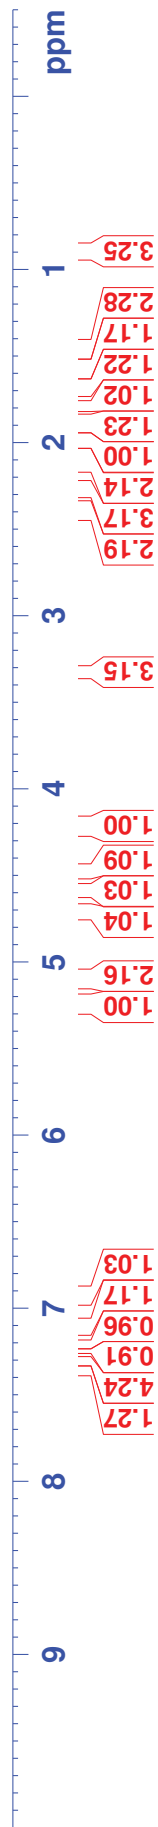

ch12-136 C13 300

179.34  
171.15

141.17  
139.12  
131.20  
128.49  
128.33  
127.67  
127.61  
123.91  
123.73  
108.99

76.44  
71.30  
71.11

56.42  
55.25  
54.91

36.98  
35.59  
34.21  
30.97  
27.63  
22.93  
18.99  
13.58

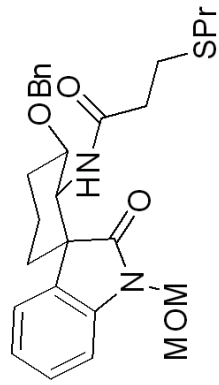

31

585

ppm

0

20

40

60

80

100

120

140

160

180

200

ch12-119-1 400a

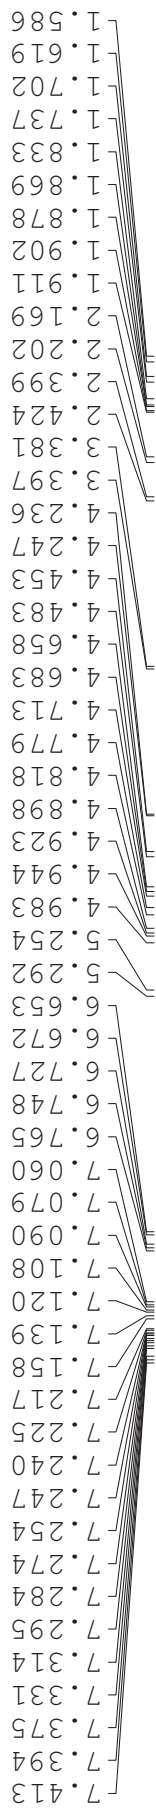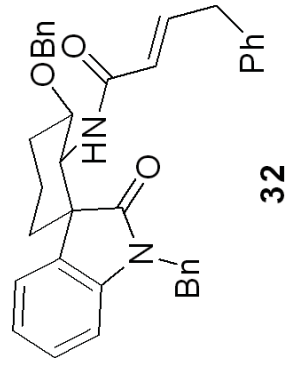

985

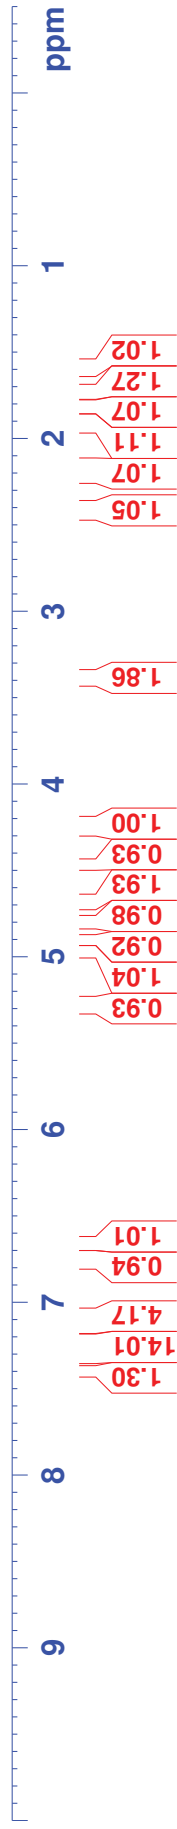

ch12-119-1 C13 400a

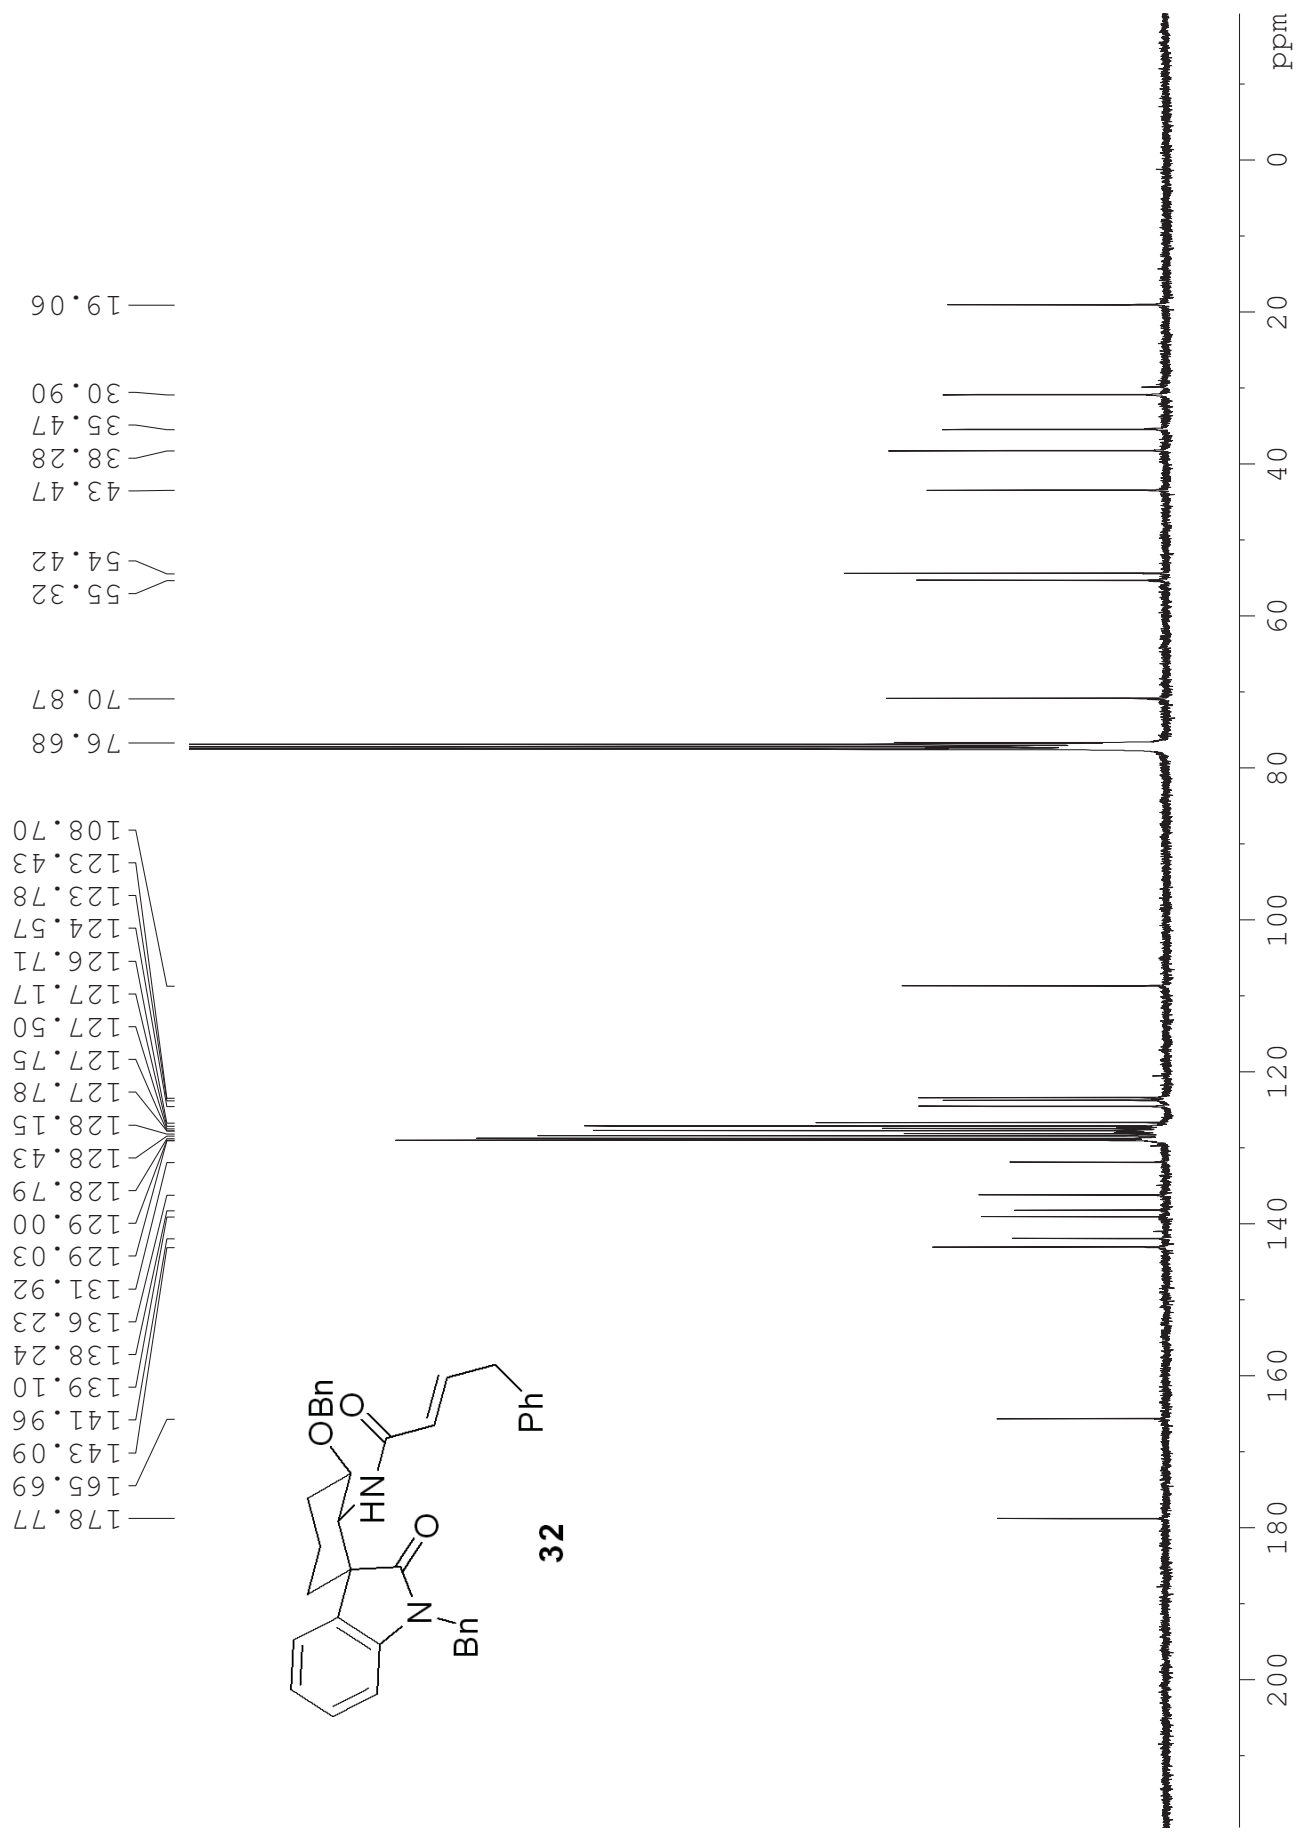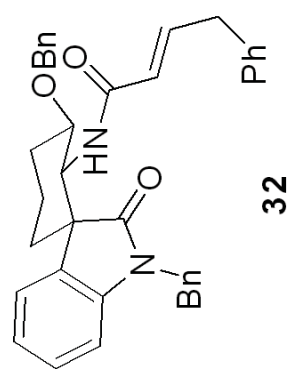

ch12-173 300

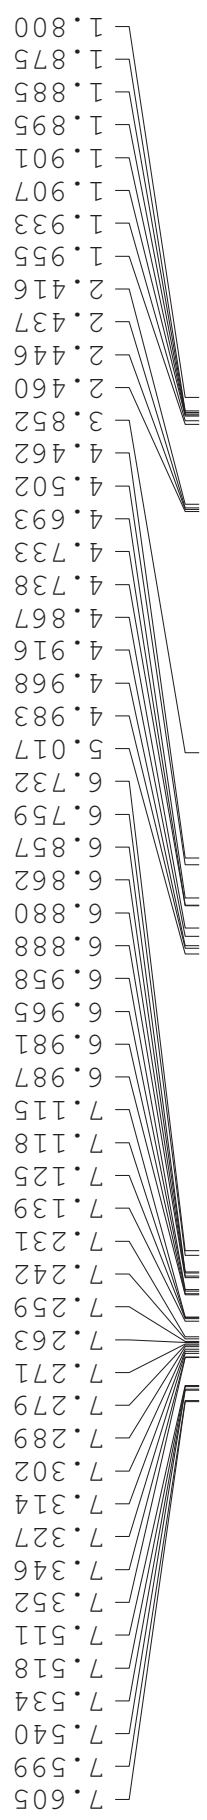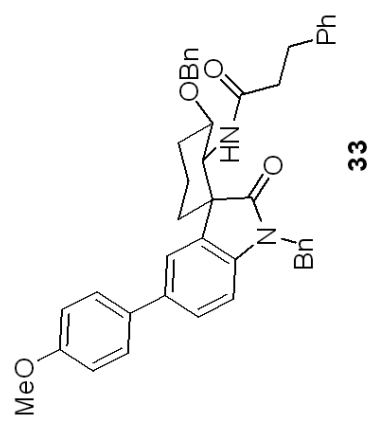

888

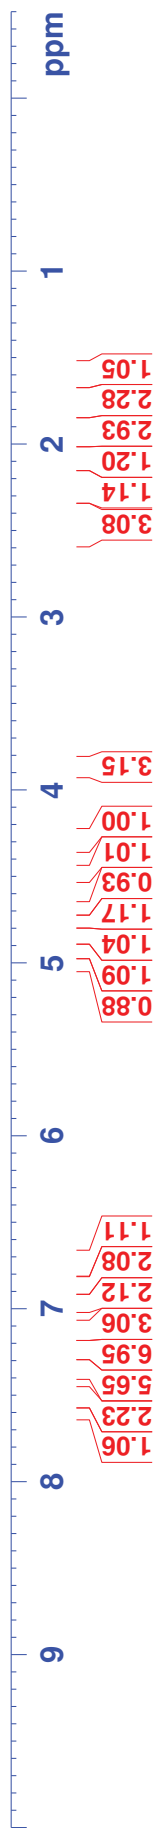



ch12-173 C13 300

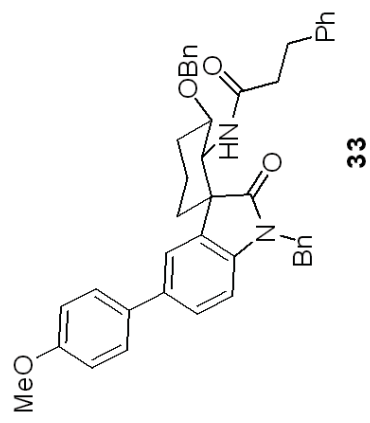

|        |        |        |        |        |        |        |        |        |        |        |        |        |        |        |        |        |        |        |        |        |        |        |
|--------|--------|--------|--------|--------|--------|--------|--------|--------|--------|--------|--------|--------|--------|--------|--------|--------|--------|--------|--------|--------|--------|--------|
| 178.73 | 172.01 | 159.07 | 141.03 | 140.83 | 139.20 | 136.31 | 136.29 | 133.83 | 132.27 | 129.05 | 128.47 | 128.45 | 128.27 | 128.18 | 127.94 | 127.53 | 127.33 | 126.56 | 126.07 | 122.86 | 114.38 | 108.72 |
|--------|--------|--------|--------|--------|--------|--------|--------|--------|--------|--------|--------|--------|--------|--------|--------|--------|--------|--------|--------|--------|--------|--------|

|       |       |       |       |       |       |       |       |       |       |       |
|-------|-------|-------|-------|-------|-------|-------|-------|-------|-------|-------|
| 76.41 | 70.80 | 55.53 | 55.34 | 54.58 | 43.70 | 38.23 | 35.39 | 31.45 | 30.99 | 19.04 |
|-------|-------|-------|-------|-------|-------|-------|-------|-------|-------|-------|

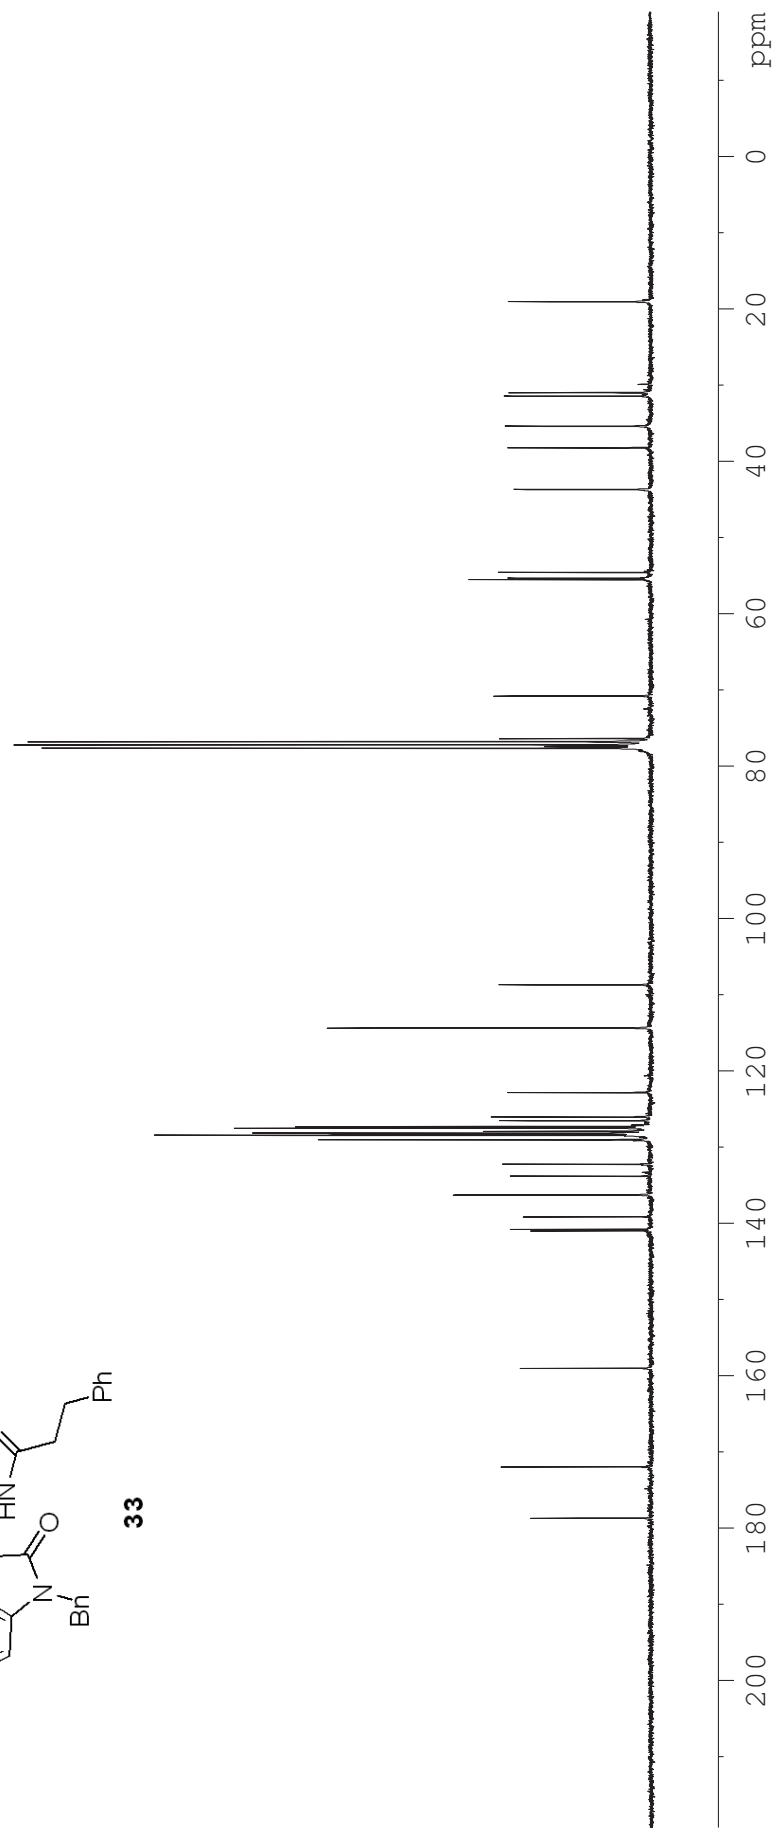

Supplement: NIHMS247275-supplement-1_si_001.pdf [file NIHMS247275-supplement-1_si_001.pdf]
